# Supplementary material for: Identification of pleiotropic loci mediating structural and non-structural carbohydrate accumulation within the sorghum bioenergy association panel using high-throughput markers
Source: Front Plant Sci. 2024 Feb 28;15:1356619. doi: 10.3389/fpls.2024.1356619 (PMC10933071; doi:10.3389/fpls.2024.1356619)
Supplement: Supplementary file 2 [file Table_1.xlsx]

## Sheet: BAP_Phenotypes_Table S1
Table S1: Phenotypic traits recorded on the whole set of accessions of the Bioenergy Association Panel.
Taxa	Plant Height	DTH	Fresh Weight (kg)	Brix %	Dry Weight (kg)	ADF (% DM)	NDF (% DM)	NFC (% DM)	Lignin (% DM)	Brown	Red	White	Yellow	Pericarp
ATLAS	243.5	126	2.1925	10.3	0.3925	34.94	51.02	42.87	4.45563	0	0	0	0	NA
LEOTI	203	110.5	1.11	10.45	0.2025	30.76	51.87	42.79	4.27392	0	0	0	0	NA
PI144134	269	117	1.675	12.45	0.205	35.74	50.97	40.79	4.94123	1	0	0	0	Brown
PI145619	207	NA	NA	NA	0.315	35.87	52.53	37.55	4.72584	0	1	0	0	Red
PI145626	304.5	149	2.5575	11.6	0.47	30.04	42.15	50.33	3.6786	0	1	0	0	Red
PI145632	NA	NA	NA	NA	NA	NA	NA	NA	NA	0	0	0	1	Yellow
PI145633	241	124.5	1.3875	8.95	0.2025	46.68	70.5	22.39	7.06991	0	1	0	0	Red
PI146890	330	126	1.665	12.15	0.3375	38.3	52.47	40.81	5.48054	0	1	0	0	Red
PI147224	290	120	1.545	14.85	0.2525	NA	NA	NA	NA	0	0	1	0	White
PI152591	362	157.5	2.455	7.5	0.4775	52.75	76.03	15.91	9.83816	0	0	1	0	White
PI152651	350.5	158.5	1.3575	10.2	0.3375	39.88	61.4	32.91	5.74075	0	0	1	0	White
PI152694	397.5	147	2.5675	14	0.7275	44.99	65.89	30.54	6.83115	0	0	1	0	White
PI152727	346	155.5	1.7725	7.35	0.3175	50.85	75.61	20.7	8.64106	0	1	0	0	Red
PI152728	355	152	1.85	7.6	0.33	43.91	68.27	26.71	7.20903	0	0	1	0	White
PI152730	397.5	157.5	2.915	4.45	0.2925	40.45	58.62	34.07	4.82261	0	0	0	1	Yellow
PI152733	413	158.5	3.245	14.25	0.565	41.81	64.78	32.27	6.65096	1	0	0	0	Brown
PI152751	415	158.5	2.805	15.1	0.6525	41.04	60.79	34.89	6.69516	0	0	1	0	White
PI152771	299	159.5	2.4875	10.7	0.46	35.21	49.58	46.01	5.20373	1	0	0	0	Brown
PI152816	266	158.5	1.605	12.45	0.35	35.93	53.36	41.63	5.50508	1	0	0	0	Brown
PI152828	183.5	137	1.3375	9.75	0.2325	39.86	62.9	25.37	3.70174	1	0	0	0	Brown
PI152860	372.5	157	2.7825	14.45	0.4275	37.75	54.86	42.1	6.01513	0	1	0	0	Red
PI152862	515	159.5	2.225	12.45	0.695	45.67	65.78	30.01	7.02969	0	0	1	0	White
PI152923	310	153	1.48	9.3	0.225	45.99	64.68	28.32	6.84589	0	0	1	0	White
PI152961	347.5	154.5	1.8025	10.75	0.555	40.29	58.36	36.44	5.97085	0	0	1	0	White
PI152963	399	157	2.61	8.25	0.39	48.89	71.91	23.04	8.2941	0	1	0	0	Red
PI152965	197	154	1.71	14.3	0.2775	32.03	49.49	45.43	4.56412	0	1	0	0	Red
PI152966	369	158	1.94	10.85	0.495	40.4	60.57	34.49	6.88059	0	0	0	1	Yellow
PI152967	338	159.5	2.26	13.2	0.505	36.24	53.3	43.17	5.63333	0	0	1	0	White
PI152971	342.5	158.5	2.77	14	0.4625	34.23	52.45	43.81	5.56876	0	0	1	0	White
PI153877	416	159	2.205	9.35	0.4275	54.72	78.24	15.76	10.0854	0	0	0	1	Yellow
PI154750	452	158	2.77	9.7	0.7225	43.63	65.13	31.5	7.84111	0	1	0	0	Red
PI154844	371	159.5	2.955	12.35	0.805	35.46	53.76	41.91	5.53552	0	0	0	0	NA
PI154846	410.5	158	2.175	11.45	0.4825	40.85	61.89	34.94	7.49595	0	1	0	0	Red
PI154944	316.5	157	1.9125	7.75	0.3075	35.84	55.94	41.04	5.6777	0	1	0	0	Red
PI154987	410	157	2.45	10.7	0.49	43.74	63.7	31.22	6.74186	0	1	0	0	Red
PI154988	152.5	118.5	0.685	8.75	0.12	48.31	75.05	14.16	6.61075	0	1	0	0	Red
PI155149	475	159	6.325	11.5	0.795	45.05	65.26	30.97	7.1538	0	0	0	1	Yellow
PI155516	396.5	157.5	3.2525	8.75	0.4725	46.68	68.48	25.39	7.34739	0	1	0	0	Red
PI155760	304	126	0.87	9.85	0.235	48.22	71.32	22.79	6.94651	0	0	1	0	White
PI155885	409	158	2.93	7.75	0.4575	49.6	71.09	23.17	8.61919	0	0	1	0	White
PI156018	335	159	1.495	7.85	0.2925	50.68	74.81	18.2	9.26039	1	0	0	0	Brown
PI156178	359.5	158	1.9675	6.9	0.34	45.94	69.6	24.55	7.35068	1	0	0	0	Brown
PI156203	372.5	159	2.605	9.7	0.38	39.67	58.34	36.48	5.56166	0	1	0	0	Red
PI156217	422	159	4.18	9.3	0.43	42.54	62.3	34.14	6.40887	1	0	0	0	Brown
PI156268	496	158.5	6.5875	8.6	1.14	43.81	64.53	30.39	7.17673	1	0	0	0	Brown
PI156326	370	156	4.52	7	0.435	45.59	67.52	24.21	6.92053	0	0	1	0	White
PI156330	348	155.5	2.86	6.45	0.335	46.79	70.94	22.05	7.04126	0	1	0	0	Red
PI156393	382.5	158.5	3.7775	9	0.485	45.15	66.24	30.86	7.98673	0	1	0	0	Red
PI156463	269.5	159	1.5575	8.25	0.365	39.28	60.19	32.44	5.10901	1	0	0	0	Brown
PI156487	395.5	158	3.0975	7.9	0.635	47.95	70.9	25.28	7.52055	0	1	0	0	Red
PI156871	340	153	0.495	7.1	0.235	49.77	74.91	19.99	8.28253	0	1	0	0	Red
PI156890	300	132	2.435	15.9	0.29	NA	NA	NA	NA	0	1	0	0	Red
PI157030	382	154	4.45	7.7	0.32	46.74	71.73	24.43	7.54138	0	0	0	1	Yellow
PI157033	304.5	158.5	2.08	13.35	0.48	42.15	61.7	32.06	5.62949	1	0	0	0	Brown
PI157035	387.5	159	2.07	12.8	0.4875	38.62	61.46	34	4.68457	0	1	0	0	Red
PI157804	257	112	0.6425	8.4	0.16	43.24	65.26	27.19	5.89912	0	0	1	0	White
PI167093	400	135	1.33	13.6	0.3575	47.35	67.08	28.66	7.12181	0	0	0	0	NA
PI170787	232	118.5	1.165	12.6	0.245	NA	NA	NA	NA	1	0	0	0	Brown
PI175919	225	117	1.52	13	0.2175	NA	NA	NA	NA	1	0	0	0	Brown
PI176766	322.5	112	1.1325	7.2	0.3525	45.33	72.04	20.45	7.24211	0	1	0	0	Red
PI179749	200	116	0.5825	9.05	0.16	43.41	66.43	25.83	6.48733	1	0	0	0	Brown
PI180348	178	112	0.595	10.4	0.2375	28.03	58.97	37.32	5.00953	0	0	1	0	White
PI181080	234.5	108	0.89	8.55	0.1675	43.06	72	21.23	6.48024	0	0	0	0	NA
PI181083	180	114.5	1.025	9.65	0.1525	38.7	59.56	32.18	3.99557	1	0	0	0	Brown
PI181899	190	104	0.28	7.9	0.1075	43.19	73.28	18.54	5.67756	0	0	1	0	White
PI195754	236.5	118.5	1.245	10.7	0.23	44.21	71.25	19.45	5.429	0	0	1	0	White
PI196049	459	159	5.4	12.65	0.965	40.47	61.53	34.78	6.57397	0	0	1	0	White
PI196583	313	132	2.3175	11.6	0.3575	34.04	49.51	44.61	4.56847	0	1	0	0	Red
PI196586	220.5	118.5	1.6175	11.8	0.2475	30.33	48.86	44.32	4.60439	0	0	0	0	NA
PI196598	226.5	126	1.3175	9.4	0.2	51.27	79.03	12.2	7.61918	1	0	0	0	Brown
PI197542	189	120	0.25	8.7	0.075	41.34	80.63	9.19	3.14042	1	0	0	0	Brown
PI19770	277	116	1.9825	12.75	0.37	NA	NA	NA	NA	1	0	0	0	Brown
PI213900	292.5	124.5	0.685	8.5	0.165	51.27	82.46	9.71	6.71841	1	0	0	0	Brown
PI217691	259	157	1.165	9	0.185	40.13	60.08	32.04	5.6647	0	0	1	0	White
PI218112	195	104	1.3	12.75	0.2925	32.74	51.2	44.08	5.28046	0	0	1	0	White
PI221548	257.5	146	1.9125	10.9	0.305	46.54	68.8	27.74	8.60161	0	0	0	0	NA
PI221651	355.5	157	2.6175	6.95	0.3	47.43	69.47	22.84	7.17153	0	0	0	1	Yellow
PI226096	336	122	0.68	7.85	0.17	52.06	84.49	9.47	6.17516	0	1	0	0	Red
PI22913	303	120	1.575	12.9	0.305	NA	NA	NA	NA	0	0	0	0	NA
PI229841	320	150	1.1525	7.7	0.315	50.52	76.02	20.03	7.57393	0	0	0	0	NA
PI250583	278	118.5	2.1375	10.38	0.3425	49.93	74.45	18.94	7.62479	0	0	0	1	Yellow
PI251672	318	135	2.565	13.05	0.395	NA	NA	NA	NA	1	0	0	0	Brown
PI253986	227	104	0.695	6.55	0.1675	39.72	64.59	26.55	5.63597	0	0	1	0	White
PI255239	NA	NA	NA	NA	NA	NA	NA	NA	NA	1	0	0	0	Brown
PI255744	291.5	132	2.32	8.05	0.4275	37.3	54.01	41.34	5.23381	0	0	1	0	White
PI257599	317.5	155.5	3.0525	12.1	0.575	40.81	69.01	29.03	5.57386	0	0	1	0	White
PI257600	333.5	158.5	2.1975	13.45	0.5325	37.78	55.68	41.97	5.90123	0	0	1	0	White
PI266927	453.5	158.5	2.485	9.55	0.45	47.08	69.23	26.2	8.61997	0	0	0	1	Yellow
PI267573	454	154	3.2675	6.95	0.5125	49.16	69.84	23.71	8.99187	0	1	0	0	Red
PI273465	433	157.5	3.2775	8.8	0.5825	45.79	67.66	28.76	6.91232	0	0	0	1	Yellow
PI273969	363	158	1.92	11.85	0.32	38.28	60.75	37	6.43406	1	0	0	0	Brown
PI276837	376	158	3.56	14.45	0.715	34.64	51.13	45.48	4.89186	0	0	1	0	White
PI291246	340	138	2.645	14	0.53	37.63	54.14	40.02	5.8596	0	0	0	0	NA
PI297130	390	158.5	2.6	11.8	0.4925	43.47	65.89	30.08	6.57025	0	0	0	0	NA
PI297155	235.5	112	0.785	6.1	0.1425	46.49	77.03	12.35	6.58399	0	0	0	0	NA
PI297171	372	154.5	2.0925	7.7	0.3775	49.83	72.71	22.21	8.35617	0	0	0	0	NA
PI300117	NA	NA	NA	NA	NA	48.53	77.67	15.8	6.8926	1	0	0	0	Brown
PI300118	332	129	0.395	9.25	0.21	50.86	76.27	17.19	7.20178	1	0	0	0	Brown
PI300119	260	125	0.2875	3.35	0.1625	50.35	80.59	10.18	6.32995	1	0	0	0	Brown
PI302252	316	126	1.105	10.6	0.3225	44.49	64.47	27	5.56387	0	0	1	0	White
PI303658	319	159.5	2.575	13.1	0.4025	37.28	58.1	37.85	6.17136	0	1	0	0	Red
PI329256	400	152	4.155	13.5	0.845	41.81	63.39	33.33	7.58625	0	0	1	0	White
PI329286	385	155	2.995	6.8	0.45	54.42	77.05	18.61	10.094	0	0	1	0	White
PI329299	422	154	4.12	9.2	0.865	42.71	66.24	31.73	7.50187	0	1	0	0	Red
PI329300	432	156	5.53	9.1	0.825	42	65.13	32.47	7.25876	0	1	0	0	Red
PI329301	300	NA	NA	NA	0.765	NA	NA	NA	NA	0	1	0	0	Red
PI329310	390	160	3.195	10.2	0.83	36.83	58.39	39.81	7.09474	0	1	0	0	Red
PI329319	370	154.5	2.78	6.75	0.535	49.02	72.59	19.39	8.33677	0	1	0	0	Red
PI329326	289	158	2.295	5	0.3525	49.83	70.95	21.35	9.10641	0	1	0	0	Red
PI329333	410.5	159.5	3.4275	9.95	0.6875	37.97	57.94	38.04	5.58759	0	0	1	0	White
PI329338	400	155	1.435	9.1	0.355	47.98	68.27	26.94	7.82589	1	0	0	0	Brown
PI329351	421	157.5	2.7975	8.2	0.545	52.69	75.32	20.38	8.44872	1	0	0	0	Brown
PI329394	515	159	6.96	12.3	0.97	38.77	56.51	41.38	6.33037	0	0	0	0	NA
PI329403	495	155	4.775	11	1.055	41.47	60.09	35.67	6.77385	0	0	0	1	Yellow
PI329435	153.5	118.5	0.71	7.95	0.1075	49.02	73.62	15.09	7.10215	0	0	0	1	Yellow
PI329440	367.5	157	3.545	13.35	0.6275	39.82	60.51	36.62	7.1751	0	0	0	0	NA
PI329465	452.5	157	2.165	10.5	0.5575	49.28	73.45	21.82	9.98116	0	1	0	0	Red
PI329466	517.5	145	1.545	8.95	0.4625	47.78	72.15	24.49	8.80322	0	1	0	0	Red
PI329471	480	153	4.125	6.9	0.325	49.27	72.59	22.74	7.56065	0	1	0	0	Red
PI329473	455	162	4.205	8	0.685	56.55	82.06	14.85	9.75242	1	0	0	0	Brown
PI329478	289.5	158	2.2525	8.75	0.25	47.7	66.89	20.16	7.14316	0	1	0	0	Red
PI329480	470	153	4.04	5.8	0.54	51.07	73.59	20.36	8.69067	0	1	0	0	Red
PI329501	294	157.5	2.8075	7.4	0.3175	48.03	71.42	21.17	7.52804	0	1	0	0	Red
PI329506	295	158.5	2.5425	6.5	0.375	46.83	70.69	22.45	6.44723	1	0	0	0	Brown
PI329510	451.5	156	3.4625	8.35	0.635	47.38	70.12	27.49	7.48825	1	0	0	0	Brown
PI329511	455	158	3.8075	10.35	0.8575	43.81	65.53	30.6	7.22748	1	0	0	0	Brown
PI329517	303.5	159	2.7625	7.8	0.4725	43.76	66.64	25.53	6.5558	0	1	0	0	Red
PI329518	311	156.5	2.9075	6.9	0.3225	45.74	66.84	24.9	6.37121	0	1	0	0	Red
PI329519	355	158.5	3.495	7.6	0.3875	49.21	70.85	19.73	6.5802	0	1	0	0	Red
PI329541	340.5	157.5	3.375	5.95	0.42	49.14	70.64	23.41	9.01	0	0	1	0	White
PI329545	396	158.5	2.7	7.35	0.4525	51.37	75.2	20.64	8.18011	1	0	0	0	Brown
PI329546	426	157.5	2.785	7.05	0.565	52.75	76.34	18.04	8.97357	1	0	0	0	Brown
PI329550	450	157.5	3.14	5.3	0.4975	47.96	70.8	25.13	7.82846	0	1	0	0	Red
PI329551	412	158	2.3975	8.1	0.5675	52.51	76.26	17.76	9.18829	0	0	0	0	NA
PI329554	450	157.5	3.5225	5.6	0.4425	50.2	72.95	19.19	8.93596	0	1	0	0	Red
PI329569	525	153	7.795	8.2	0.785	50.11	73.78	22.66	8.94315	1	0	0	0	Brown
PI329570	338.5	159	3.605	8.7	0.385	42.68	63.32	32.42	5.98854	0	1	0	0	Red
PI329583	391	156	2.715	6.8	0.45	51.18	73.64	20.82	7.99652	0	0	0	0	NA
PI329584	405	153	3.81	5.4	0.54	54.47	77.84	16.48	9.74565	0	0	1	0	White
PI329585	402.5	157	3.21	6.1	0.465	50.07	71.05	20	7.95993	0	1	0	0	Red
PI329605	364.5	157	2.8325	6.6	0.4375	49.89	74.27	20.07	10.8344	0	1	0	0	Red
PI329614	265	158	2.5375	7.2	0.3825	42.86	64.04	27.44	5.41003	0	1	0	0	Red
PI329615	351.5	157	3.825	6	0.4275	43.99	66.13	26.57	6.67391	1	0	0	0	Brown
PI329617	414.5	158	2.725	7	0.485	51.08	73.25	19.91	7.83548	0	0	1	0	White
PI329618	328.5	157	2.725	8.1	0.4525	44.16	64.83	27.73	6.74013	0	1	0	0	Red
PI329632	338.5	157	2.4175	6.75	0.38	52.73	79.8	13.89	8.13352	0	1	0	0	Red
PI329644	390	157.5	3.285	7.15	0.58	54.41	78.87	15.79	9.16775	0	1	0	0	Red
PI329645	NA	NA	NA	NA	NA	NA	NA	NA	NA	0	1	0	0	Red
PI329646	490	152	3.57	6.1	0.67	52.24	76.02	17.75	9.12283	0	1	0	0	Red
PI329665	388.5	158.5	2.7425	7.85	0.5775	46.01	66.49	26.47	7.77618	1	0	0	0	Brown
PI329673	379	155.5	4.17	6.65	0.435	48.49	72.52	21.92	7.4928	0	1	0	0	Red
PI329699	362	157	2.635	13.6	0.5675	34.77	52.4	44.53	4.63223	0	0	0	0	NA
PI329702	500	157	4.1675	7.05	0.7725	53.48	77.73	17.81	9.8954	0	1	0	0	Red
PI329710	445	154	3.22	9.4	0.38	46.86	71.68	25.68	8.99678	1	0	0	0	Brown
PI329711	389.5	158	3.4475	6.55	0.735	47.67	70.96	23.35	8.34126	0	0	1	0	White
PI329841	460	157.5	3.0425	12.15	0.8075	43.6	65.88	30.15	6.98919	1	0	0	0	Brown
PI329843	395	158	4.4	6.6	1.26	52.43	73.86	17.31	10.3336	0	1	0	0	Red
PI329864	409.5	157	2.7325	13.7	0.7325	41.19	61.02	33.63	7.22702	0	1	0	0	Red
PI329865	400	157.5	4.2425	8.85	0.78	42.43	64.55	31.46	7.28191	0	0	0	0	NA
PI330167	401	158.5	2.955	12.15	0.655	37.11	60.82	36.74	5.73184	0	0	0	0	Mixed
PI330168	303.5	159	4.215	9.3	0.8425	40.6	53.68	34.87	5.79491	0	0	0	0	NA
PI330169	447.5	157	4.035	11.6	0.6775	40.64	62.13	34.73	7.11499	0	0	1	0	White
PI330181	490	163	2.745	12.2	1.75	47.01	66.41	29.1	7.71647	0	0	1	0	White
PI330182	500	158	3.1025	14	1.435	46.55	67.02	29.19	7.67772	0	0	0	1	Yellow
PI330184	405	157	1.5975	10.85	0.4925	47.34	69.65	24.41	8.57087	0	1	0	0	Red
PI330185	405	152	3.14	11.3	1.075	42.76	63.98	32.32	6.82237	0	0	0	1	Yellow
PI330195	383	159	2.3325	12.3	0.485	43.61	65.43	28.99	6.69551	0	1	0	0	Red
PI330196	485	155	2.545	8.3	0.505	52.06	78.68	16.13	8.89535	0	1	0	0	Red
PI330199	473.5	135	1.155	11.4	0.2975	45.13	65.18	29.59	6.74221	1	0	0	0	Brown
PI330796	392.5	158	3.29	7	0.5825	47.36	71.65	21.7	7.5337	0	0	1	0	White
PI330803	433	158.5	2.855	5.25	0.565	52.58	78.17	18.09	10.1727	0	0	1	0	White
PI330807	238.5	158.5	2.945	5.7	0.33	44.94	66.15	26.81	6.5218	0	0	1	0	White
PI330833	455	159	3.775	7.9	0.5475	50.68	72.5	22.23	8.83158	0	0	0	0	NA
PI330858	390.5	158	2.7825	7.45	0.565	48.62	70.78	25	7.9612	0	0	1	0	White
PI337680	334.5	162	4.545	4.1	0.425	53.28	73.5	15.88	8.61358	0	0	1	0	White
PI337689	337.5	157.5	3.63	8.9	0.7825	47.35	70.12	25.66	7.94163	0	0	0	0	NA
PI35038	232.5	118.5	1.5775	9.05	0.285	NA	NA	NA	NA	0	1	0	0	Red
PI365512	90	117	0.4525	9.35	0.085	44.99	66.97	19.56	5.19774	1	0	0	0	Brown
PI452542	522	159	6.23	12.8	0.77	53.98	78.98	14.49	9.43245	0	0	1	0	White
PI452544	482	157	8.005	6.3	1.0975	42.45	64.75	29.08	6.36388	0	0	0	0	NA
PI452619	NA	NA	NA	NA	NA	45.26	64.66	31.87	7.45098	0	0	0	0	NA
PI452692	436.5	156.5	4.4125	8	1	48.63	70.05	25.27	7.9621	1	0	0	0	Brown
PI453106	470	162	3.17	10.2	NA	NA	NA	NA	NA	1	0	0	0	Brown
PI453177	392.5	157.5	3.34	5.7	0.365	49.35	69.67	22.31	7.66911	0	0	0	0	NA
PI453696	NA	153	4.735	8.2	1.265	44.98	68.85	28.35	7.66572	0	0	0	1	Yellow
PI455217	535	157.5	4.5575	8.65	0.995	47.4	69.73	26.03	8.05652	0	0	0	0	NA
PI455221	491.5	159.5	3.3525	10.9	0.495	52.32	74.08	21.87	9.53068	0	0	0	0	NA
PI455280	400	154	3.435	6.3	0.44	41.75	60.47	29.11	6.61484	0	0	0	0	NA
PI455301	458	157	3.9725	9.85	0.64	40.59	62.42	33.01	6.07664	0	0	0	0	NA
PI455307	499.5	158	4.14	6.3	0.5775	52.44	76.02	18.97	9.21917	0	0	0	0	NA
PI505717	465	157.5	3.0025	8.7	0.47	48.92	73.99	20.89	9.11427	0	0	1	0	White
PI505722	412.5	158.5	3.055	9.55	0.51	46.23	70.96	23.27	7.73787	0	0	0	0	NA
PI505735	374	156	2.175	13.1	0.54	NA	NA	NA	NA	0	0	0	0	NA
PI506030	415	157	2.35	9.5	0.4025	49.5	72.88	21.56	7.61124	0	0	1	0	White
PI506069	408.5	159	2.5225	7.9	0.365	51.44	74.65	19.28	7.81539	0	0	0	1	Yellow
PI506114	367.5	157	3.4425	5.25	0.35	54.52	77.16	16.07	9.67746	0	0	0	0	NA
PI506122	322	158	1.5775	6.4	0.415	51.77	75.45	18.07	9.40347	0	0	0	0	NA
PI508366	418	156	2.96	6.35	0.4025	49.97	72.79	19.49	8.69162	0	0	1	0	White
PI510757	313	157	3.2975	7.15	0.555	40.74	62.13	30.7	6.71935	0	0	1	0	White
PI511355	308.5	157	2.1775	14.45	0.615	30.1	47.45	47.29	4.40692	0	0	0	0	NA
PI513898	341.5	159	1.6925	6.9	0.2125	50.96	74.02	16.48	8.09481	0	0	1	0	White
PI514456	458.5	157	2.4575	7	0.5025	50.49	74.16	22.87	9.18842	0	0	1	0	White
PI521019	408.5	155.5	3.3875	8.65	0.5	42.37	64.96	30.32	7.64136	0	1	0	0	Red
PI521152	362	158	3.1025	9.7	0.51	48.24	71.56	23.19	7.38906	0	0	0	1	Yellow
PI521280	387	158.5	2.5125	7.8	0.465	49.21	72.07	21.49	7.81126	1	0	0	0	Brown
PI521281	362.5	159	2.8825	7.35	0.4925	45.57	67.17	25.53	5.91601	1	0	0	0	Brown
PI521290	396	158.5	2.405	11.3	0.51	50.7	72.4	21.27	8.55173	0	0	0	0	NA
PI524475	301.5	157.5	3.735	5.45	0.2875	44.84	67.26	26.4	5.69523	0	0	1	0	White
PI525049	415.5	158	2.7675	8.15	0.57	53.07	78.97	17.6	10.409	0	0	0	0	NA
PI52606	154	124.5	0.9175	8	0.1125	48.38	64.15	22.97	5.52084	0	0	0	0	NA
PI526905	121	117	1.015	9.9	0.155	40.27	63.19	27.63	4.52316	1	0	0	0	Brown
PI527045	140.5	127.5	0.9	10.15	0.1825	38.43	59.04	30.06	5.01548	1	0	0	0	Brown
PI533792	89.5	134	0.275	6.9	0.0975	41.17	75.26	15.18	5.3486	1	0	0	0	Brown
PI533902	162.5	104	1.0275	6.25	0.1675	45.79	70.26	11.35	5.21275	0	1	0	0	Red
PI533998	183.5	110.5	0.2825	10.55	0.085	38.4	63.99	24.29	5.34158	1	0	0	0	Brown
PI534120	101	118.5	0.575	9.2	0.1325	43.43	73.26	11.59	4.37181	1	0	0	0	Brown
PI534165	62	112	0.855	8	0.12	45.54	72.43	14.78	5.03437	0	0	1	0	White
PI535783	187	104	1.22	13.2	0.3775	16.34	47.32	45.67	5.8458	1	0	0	0	Brown
PI535785	239.5	118.5	1.54	14.75	0.365	NA	NA	NA	NA	0	0	1	0	White
PI535792	101.5	108	0.6125	5.9	0.1425	38.23	66.45	18.23	3.65631	1	0	0	0	Brown
PI535793	146	118.5	0.925	12.1	0.175	29.67	54.29	40.11	5.23102	0	0	1	0	White
PI535794	114	118.5	0.76	12.55	0.1625	NA	NA	NA	NA	0	0	1	0	White
PI535795	206	104	1.4075	14	0.335	22	44.81	50.94	3.12871	1	0	0	0	Brown
PI535796	152.5	104	1.835	10.65	0.42	15.05	54.87	45.67	4.17778	0	1	0	0	Red
PI540518	249	108	0.535	5.35	0.1475	46.87	79.99	10.44	5.22538	0	0	0	1	Yellow
PI542718	140.5	104	0.61	3.95	0.1525	46.39	73.93	18.86	6.95136	0	1	0	0	Red
PI550604	137.5	104	0.6175	7	0.115	41.47	74.73	19.84	5.44072	0	0	0	0	NA
PI552851	NA	NA	NA	NA	NA	NA	NA	NA	NA	0	0	0	1	Yellow
PI561840	172	110.5	0.845	4.85	0.1225	45.82	72.52	14.21	5.39913	0	0	0	0	NA
PI562717	300	125	0.32	9.75	0.2125	44.63	69.01	24.67	7.10971	1	0	0	0	Brown
PI562730	467	159	1.795	10.65	0.47	49.74	73.13	23.61	8.33701	1	0	0	0	Brown
PI562732	504	156	6.0125	13.2	1.0575	39.61	61.69	34.76	6.38253	0	0	0	0	NA
PI562781	407.5	158	3.095	8.65	0.425	50	72.96	21.05	9.21611	0	0	1	0	White
PI562897	370	158.5	1.4575	7.75	0.35	49.3	74.28	18.22	7.72997	0	0	1	0	White
PI562970	375.5	159.5	2.6175	7.3	0.3875	52.2	74.67	18.24	8.88608	0	0	1	0	White
PI562971	293	156.5	2.4325	7.3	0.325	48.33	69.71	20.29	7.6817	0	0	1	0	White
PI562981	273	156	2.1975	6.5	0.365	49.62	71.78	20.57	8.82019	0	0	1	0	White
PI562982	356.5	158.5	1.9275	6	0.2975	52.51	74.15	17.73	9.13647	0	0	0	1	Yellow
PI562985	359	154	2.34	5.55	0.385	49.7	70.15	18.12	9.23016	0	1	0	0	Red
PI562990	372.5	157.5	2.2175	6	0.245	46	65.85	25.51	7.50483	0	1	0	0	Red
PI562991	362	156	3.2375	6.25	0.3525	53.39	77.58	15.75	8.78458	0	0	1	0	White
PI562994	385.5	158.5	2.3625	6.55	0.31	50.73	73.33	17.95	8.68453	0	1	0	0	Red
PI562997	390.5	159	2.075	6.6	0.3275	45.79	68.65	24.53	6.91286	0	1	0	0	Red
PI562998	296.5	157	2.1	6.35	0.2475	43.22	63.22	28.63	7.01116	0	1	0	0	Red
PI563002	271.5	157	2.1625	5.2	0.1925	47.99	68.99	21.54	7.58537	0	1	0	0	Red
PI563006	433	158	3.5275	8.3	0.6	53.14	77.32	17.89	10.5927	0	0	0	1	Yellow
PI563009	350.5	156	1.925	6.6	0.335	50.75	74.11	19.69	9.15101	0	0	1	0	White
PI563020	337.5	159.5	2.1775	6.05	0.34	47.89	69.61	22.97	8.25548	0	0	1	0	White
PI563021	364	158.5	1.815	6.9	0.36	49.73	71.46	21.95	8.18823	0	1	0	0	Red
PI563022	356	159.5	2.645	6.25	0.4	50.65	72.05	17.8	8.98064	0	1	0	0	Red
PI563032	296.5	158	1.8575	10.7	0.5475	29.84	50	48.01	4.09323	1	0	0	0	Brown
PI563196	411	155	2.275	9.7	0.515	45.42	66.48	29.17	7.08998	1	0	0	0	Brown
PI563222	326	155.5	2.9925	8.55	0.6975	41	63.76	29.47	5.55456	0	1	0	0	Red
PI563295	281.5	157.5	2.315	12.6	0.3575	33.62	50.12	44.81	4.73072	1	0	0	0	Brown
PI563329	460	155	5.8	11.38	0.895	42.55	63.97	33.13	6.85106	0	0	0	0	NA
PI563330	448	157.5	4.745	11.55	1.225	46.33	67.7	28.74	8.67107	0	0	0	1	Yellow
PI563331	NA	NA	NA	NA	NA	NA	NA	NA	NA	0	1	0	0	Red
PI563332	486.5	156.5	3.9825	8.9	1.11	47.7	70.59	26.85	7.75397	0	0	0	1	Yellow
PI563338	457.5	159	2.935	8.3	0.665	50.31	72.21	22.34	8.34371	0	0	1	0	White
PI563348	419.5	159.5	2.71	9.4	0.3975	50.82	74.12	19.65	8.07763	0	0	1	0	White
PI563350	316	158.5	1.6125	8.55	0.2475	46.25	70.27	23.23	7.18254	0	0	1	0	White
PI563355	344	159	1.54	8.9	0.225	45.01	68.34	26.6	7.56968	0	0	1	0	White
PI564163	113	122	0.8025	7.2	0.135	47.87	72.69	15.66	4.86781	0	0	1	0	White
PI566819	352.5	136.5	2.42	15.2	0.685	56.8	82.21	12.43	10.387	0	1	0	0	Red
PI568717	297	158.5	3.2825	6.5	0.395	35.81	54.69	36.49	6.28121	0	0	1	0	White
PI569090	375	146	1.8325	8.6	0.3975	46.09	65.54	24.08	7.03779	0	0	0	1	Yellow
PI569097	445	152	2.875	9.6	1.26	40.84	61.15	34.63	5.19608	0	1	0	0	Red
PI569148	432.5	154	6.065	11.7	1.0925	42.56	66.42	31.37	7.6874	0	1	0	0	Red
PI569244	425	135	2.825	13.8	0.65	44.6	65.3	25.89	6.45213	0	0	0	0	NA
PI569264	440	158	2.555	9.15	0.6375	40.37	62.29	32.63	7.49434	0	0	0	0	NA
PI569416	306.5	158	2.455	6.35	0.32	49.25	69.63	23.84	7.91338	0	0	0	1	Yellow
PI569418	373	157.5	2.045	8.45	0.325	49.18	72.33	21.19	8.39427	0	1	0	0	Red
PI569419	346.5	158	2.5575	5.35	0.295	52.99	73.14	16.34	8.28598	0	1	0	0	Red
PI569420	312	156.5	3.0925	6.1	0.2575	42.77	64.84	29.29	5.32711	1	0	0	0	Brown
PI569421	271.5	155.5	1.765	6.6	0.3	43.72	64.82	25.51	5.91871	0	0	1	0	White
PI569422	356.5	158.5	1.8125	6.6	0.2325	51.98	74.65	19.22	8.8976	0	0	1	0	White
PI569423	373.5	157.5	3.2125	5.8	0.3125	51.51	77.09	16.9	8.84651	1	0	0	0	Brown
PI569425	267.5	160	2.1425	7.45	0.2925	45.8	65.66	24.79	7.08513	0	0	0	1	Yellow
PI569427	329	159	2.54	6.35	0.33	47.03	71.12	20.56	7.51064	0	0	1	0	White
PI569433	275.5	155.5	1.9425	7	0.4075	47.59	73.02	21.26	8.01849	0	0	1	0	White
PI569435	380	156	3.105	5	0.3375	48.15	70.19	20.3	7.41736	0	0	1	0	White
PI569443	280.5	158	2.595	6.9	0.25	44.39	65.61	25.21	5.90988	1	0	0	0	Brown
PI569444	308	157	2.365	5.95	0.2525	44.2	64.43	27.64	6.59215	0	0	1	0	White
PI569445	378	159.5	2.9575	7.6	0.3725	50.77	72.18	19.08	8.94663	0	0	1	0	White
PI569446	234	158	1.885	3.6	0.1725	50.3	73.69	16.99	6.91204	0	0	1	0	White
PI569447	362.5	159.5	2.0275	8.85	0.2625	49.39	73.38	19.08	8.35161	0	0	1	0	White
PI569452	429	154.5	2.7675	13.8	0.95	50.31	73.39	21.08	7.53743	0	1	0	0	Red
PI569453	302	157	1.6075	6.65	0.25	39.66	61.61	30.11	6.95251	0	1	0	0	Red
PI569454	430.5	160	2.76	9.65	0.44	52.02	75.39	16.66	9.2471	0	1	0	0	Red
PI569455	321	159	1.9425	7.2	0.25	48.89	73.93	18.21	7.07581	0	1	0	0	Red
PI569457	377.5	159	2.665	7.25	0.305	47.94	71.06	20.91	7.67134	0	0	0	1	Yellow
PI569458	352.5	158	2.02	6.6	0.31	51.91	75.94	18.42	9.13417	0	0	1	0	White
PI569459	318.5	159.5	2.535	7.75	0.3175	47.23	71.2	23.11	6.0306	0	0	1	0	White
PI569460	328.5	158.5	2.69	6.5	0.3275	47.87	70.19	22.64	7.54602	0	0	1	0	White
PI569462	327.5	158	3.54	6.1	0.31	45.46	67.28	26.51	6.72825	1	0	0	0	Brown
PI569465	326	157	1.795	7.2	0.2525	45.82	64.76	24.16	8.30738	0	0	0	1	Yellow
PI569886	335	156.5	2.14	6.6	0.345	50.83	74.72	18.62	10.5473	1	0	0	0	Brown
PI570031	367	159.5	2.5775	5.6	0.3725	54.91	77.18	14.28	9.09855	0	1	0	0	Red
PI570038	316.5	158.5	1.8925	7.3	0.23	49.05	72.11	19.7	6.95086	0	0	0	1	Yellow
PI570039	367.5	154.5	1.365	6.1	0.2925	51.46	75.15	16.13	9.61394	1	0	0	0	Brown
PI570042	281.5	158	2.205	5.05	0.2825	46.62	66.5	26.02	7.65119	1	0	0	0	Brown
PI570047	289	155.5	2.635	5.85	0.26	49.67	69.35	20.07	7.08703	0	1	0	0	Red
PI570053	274	158	2.175	5.85	0.325	44.48	65.45	25.49	6.23722	0	1	0	0	Red
PI570071	356	154.5	2.485	7.95	0.3525	52.84	76.04	16.16	9.62494	0	0	1	0	White
PI570073	285	153	1.875	4.5	0.21	51.88	75.83	16.36	7.72587	0	0	1	0	White
PI570074	312	159	1.765	6.7	0.3325	44.87	69.08	22.53	6.8978	0	0	0	1	Yellow
PI570075	367.5	154	1.7975	7.5	0.3575	53.03	76.8	17.99	10.3095	0	0	1	0	White
PI570076	327	158.5	1.5675	8.35	0.3475	50.52	74.89	21.8	8.83441	0	1	0	0	Red
PI570085	367.5	157.5	2.2	4.55	0.2775	51.51	74.94	20.24	8.6521	0	1	0	0	Red
PI570087	362	154.5	2.78	7.2	0.3375	48.43	70.91	20.43	7.36557	0	1	0	0	Red
PI570090	470	158	3.4425	7.7	0.56	53.78	78.22	15.98	10.3574	0	1	0	0	Red
PI570091	335.5	155.5	1.895	6.55	0.355	47.71	72.23	21.92	8.13729	1	0	0	0	Brown
PI570096	395	158	2.4325	7.35	0.29	45.84	68.2	24.77	7.01992	0	0	1	0	White
PI570106	291	157.5	2.2525	4.6	0.2775	49.6	70.89	19.63	8.71586	0	1	0	0	Red
PI570109	261	158.5	1.81	5.75	0.195	50.35	72.35	17.59	8.08698	0	0	1	0	White
PI570110	371.5	156	2.675	5.95	0.415	49.76	72.79	20.61	6.94398	0	0	1	0	White
PI570114	390	158	2.0625	7.45	0.2975	54.1	78.41	14.25	9.85142	0	0	1	0	White
PI570145	400.5	156	3.2825	8.2	0.805	45.87	67.3	27.11	7.84916	0	1	0	0	Red
PI570254	332	157.5	2.8125	8.65	0.4225	43.85	66.32	27.61	7.4301	0	0	0	1	Yellow
PI570371	321	159.5	2.155	7.05	0.36	48.26	71.61	22.33	8.63534	0	1	0	0	Red
PI570373	426	158.5	2.2575	7.95	0.42	52.48	76.66	18.42	9.73511	0	0	1	0	White
PI570388	492.5	158	2.2125	10.75	0.6525	47.5	70.69	25.08	8.97455	0	0	1	0	White
PI570393	345	157.5	4.1925	6.95	0.52	48.57	70.91	21.68	6.7414	0	1	0	0	Red
PI570400	333.5	154	2.87	7.2	0.37	49.77	74.57	20.1	7.93205	0	0	1	0	White
PI570431	481	159	3.0325	11.75	0.65	46.16	67.19	29.29	7.48212	0	0	0	1	Yellow
PI573193	326.5	155.5	2.51	6.45	0.39	43.52	62.92	28.54	6.83432	0	0	1	0	White
PI576399	173	104	0.335	14.4	0.1075	41.78	70.78	21.05	4.05423	0	0	1	0	White
PI576401	124.5	124.5	1.04	7.4	0.1675	39.8	67.06	21.91	4.78304	0	0	0	1	Yellow
PI583832	296.5	156	2.1775	13.5	0.4525	49.27	72.56	18.85	8.09644	1	0	0	0	Brown
PI585406	401	156.5	3.1925	7.55	0.3025	46.76	68.08	22.43	7.53143	0	0	0	0	NA
PI585448	395.5	159	2.995	7.7	0.525	51.03	75.39	19.48	8.04298	0	0	0	0	NA
PI585452	426	158	3.1325	6.15	0.4275	53.39	77.05	16.28	10.0345	0	1	0	0	Red
PI585454	368	160	2.26	8.1	0.32	48.33	69.83	22.82	8.83657	0	0	0	1	Yellow
PI585461	372.5	159.5	1.83	7.3	0.3025	48.08	69.71	22.71	6.8339	0	1	0	0	Red
PI585467	334	160	2.605	7.35	0.31	51.82	75.14	17.07	8.15782	0	0	0	0	NA
PI585577	268	154	1.72	7	0.39	40.14	61.08	29.73	5.84637	0	1	0	0	Red
PI585608	326.5	157	3.04	6.65	0.34	43.32	65.92	28.16	5.02432	0	1	0	0	Red
PI585954	333	158.5	1.9725	6.1	0.305	50.94	71.76	18.66	9.39317	0	1	0	0	Red
PI585961	361	158	2.1	5.2	0.2925	52.11	73.79	17.49	8.24907	0	1	0	0	Red
PI585966	310.5	158.5	1.91	6.05	0.27	50.02	71.35	19.26	8.11957	1	0	0	0	Brown
PI586435	273	132	1.33	12.1	0.2725	47.83	71.24	22.34	10.0153	0	1	0	0	Red
PI586443	350	158	3.3525	14.25	0.495	35.75	54.66	42.56	4.47362	1	0	0	0	Brown
PI586499	288	118.5	2.395	11.65	0.5375	37.06	59.82	35.01	5.76505	0	0	0	1	Yellow
PI586541	322	135	2.4375	14.4	0.3475	NA	NA	NA	NA	0	0	0	0	NA
PI593916	120	110.5	0.785	8.15	0.1025	38.6	59.03	31.33	5.17056	0	0	1	0	White
PI619807	389	158	2.995	11	0.445	42.97	61.76	30.86	8.13128	0	1	0	0	Red
PI619838	301	159.5	1.8425	6.9	0.325	46.22	68.84	24.08	7.39307	1	0	0	0	Brown
PI620072	406	159	1.995	8.25	0.4125	48.84	75.99	20.05	8.26312	0	0	0	1	Yellow
PI620157	415	157	2.6775	8.65	0.605	48.97	73.94	21.61	8.2793	0	0	0	1	Yellow
PI63715	232	118.5	1.8475	12.1	0.3475	NA	NA	NA	NA	0	1	0	0	Red
PI641807	261.5	132	2.0575	12.95	0.43	32.71	46.03	49.08	4.1747	0	0	1	0	White
PI641810	232.5	117	1.7825	14.8	0.3725	NA	NA	NA	NA	1	0	0	0	Brown
PI641815	218.5	112	1.2775	11.9	0.255	26.82	48.26	44.43	3.09136	1	0	0	0	Brown
PI641817	224	108	1.4825	11.4	0.2375	29.67	49.79	41.45	3.75424	0	1	0	0	Red
PI641821	203.5	114.5	1.415	9.95	0.2625	NA	NA	NA	NA	1	0	0	0	Brown
PI641824	254.5	118.5	1.39	11.6	0.2625	NA	NA	NA	NA	1	0	0	0	Brown
PI641829	252	120	1.7175	13	0.27	NA	NA	NA	NA	0	1	0	0	Red
PI641830	224	108	1.3975	8.95	0.18	38.48	59.53	35.39	7.57548	1	0	0	0	Brown
PI641834	257	132	1.5775	12.4	0.4225	28.83	44.48	48.23	4.18425	1	0	0	0	Brown
PI641835	270	117	2.1525	12.1	0.465	0.25	87.18	1.41	NA	0	1	0	0	Red
PI641836	193	104	1.3025	14.4	0.29	23.34	45.83	48.64	3.36622	1	0	0	0	Brown
PI641850	325	135	2.5025	12.75	0.615	32.75	44.57	47.74	3.99591	0	0	1	0	White
PI641860	252.5	118.5	1.6125	16.75	0.405	48.43	74.48	20.37	7.90103	0	0	0	0	NA
PI641862	213	112	0.8425	11.7	0.2375	19.77	52.87	39.96	6.39542	1	0	0	0	Brown
PI641892	262	147	1.27	9.8	0.32	31.3	47.49	45.61	4.57698	1	0	0	0	Brown
PI641909	274	159	1.57	8.3	0.2025	46.55	69.99	23.45	5.6036	0	1	0	0	Red
PI642998	317.5	112	0.97	8.3	0.245	42.88	69.91	25.05	6.91488	0	1	0	0	Red
PI643008	325.5	158	2.095	13.55	0.5025	39.38	58.97	36.11	4.78628	1	0	0	0	Brown
PI643016	386	158.5	2.21	15.2	0.615	33.94	49.82	44.75	5.16588	0	0	0	1	Yellow
PI646242	377	158.5	2.15	9.25	0.35	44.33	65.21	27.14	7.05756	0	1	0	0	Red
PI646251	390	158	2.53	5.3	0.4725	48.49	73.3	22.11	8.36489	1	0	0	0	Brown
PI646266	292.5	156.5	2.675	6.55	0.3425	47.92	70.75	23.28	7.22119	0	1	0	0	Red
PI651491	382.5	135	3.19	14.7	0.495	32.14	46.28	47.87	4.46422	0	1	0	0	Red
PI651493	346.5	150.5	2.695	14.25	0.6775	31.96	45.66	47.98	4.6472	0	0	1	0	White
PI651495	347.5	138	2.3325	13.65	0.415	30.79	43.04	50.34	4.52825	1	0	0	0	Brown
PI651496	357.5	146	2.105	12.1	0.4175	37.8	57.63	35.26	5.86467	0	0	0	0	NA
PI651497	382	155.5	3.15	14.5	0.8275	54.72	76.59	16.73	10.0126	0	0	0	0	NA
PI653616	337.5	132	3.6975	17.75	0.8075	NA	NA	NA	NA	1	0	0	0	Brown
PI653617	341.5	154.5	2.7025	17.55	0.615	26.88	44.63	50.86	3.76329	1	0	0	0	Brown
PI655972	173	112	0.84	7.5	0.19	47.44	77.73	12.52	6.09216	0	0	1	0	White
PI655978	97	135	0.435	9.3	0.0975	41.32	61.82	20.24	4.50902	0	0	0	1	Yellow
PI655981	191	104	0.37	5.8	0.185	42.2	65.08	31.15	7.17128	0	0	1	0	White
PI655983	269.5	124.5	1.86	12.05	0.2725	34.68	51.22	40.84	4.3659	1	0	0	0	Brown
PI656015	159.5	118.5	1.0675	13.75	0.1875	36.16	58.26	33.3	4.43732	0	0	1	0	White
PI656026	113.5	118.5	0.8225	7.05	0.1025	52.32	78.67	6.85	7.90192	0	0	0	1	Yellow
PI656035	198.5	108	0.9475	3.3	0.2225	41.11	67.81	26.83	6.41153	0	0	1	0	White
PI656065	176	117	0.8725	9.8	0.18	41.19	61.22	30.34	5.09148	0	0	1	0	White
PI92270	195	104	0.62	13.5	0.17	44.73	70.4	24.97	6.51795	1	0	0	0	Brown
Rio	332.5	146.5	1.895	12.05	0.5175	34.86	53.12	43.13	4.54062	0	0	0	0	NA
WRAY	319.5	135	2.46	16.9	0.8175	21.23	39.61	50.63	NA	0	0	0	0	NA

## Sheet: Table S2
Table S2: A list of accessions of the BAP classified based on the photoperiod sensitivity.
Taxa	PHOTOPERIOD	Type
PI_144134	PHOTOPERIOD_INSENSITIVE	Sweet
PI_145619	PHOTOPERIOD_INSENSITIVE	Sweet
PI_145626	PHOTOPERIOD_INSENSITIVE	Sweet
PI_145632	PHOTOPERIOD_INSENSITIVE	Sweet
PI_145633	PHOTOPERIOD_INSENSITIVE	Cellulosic
PI_146890	PHOTOPERIOD_INSENSITIVE	Sweet
PI_147224	PHOTOPERIOD_INSENSITIVE	Sweet
PI_152591	PHOTOPERIOD_SENSITIVE	Cellulosic
PI_152651	PHOTOPERIOD_INSENSITIVE	Sweet
PI_152694	PHOTOPERIOD_INSENSITIVE	Sweet
PI_152727	PHOTOPERIOD_SENSITIVE	Cellulosic
PI_152728	PHOTOPERIOD_SENSITIVE	Cellulosic
PI_152730	PHOTOPERIOD_SENSITIVE	Cellulosic
PI_152733	PHOTOPERIOD_SENSITIVE	Sweet
PI_152751	PHOTOPERIOD_SENSITIVE	Sweet
PI_152771	PHOTOPERIOD_INSENSITIVE	Sweet
PI_152816	PHOTOPERIOD_INSENSITIVE	Sweet
PI_152828	PHOTOPERIOD_INSENSITIVE	Cellulosic
PI_152860	PHOTOPERIOD_SENSITIVE	Sweet
PI_152862	PHOTOPERIOD_INSENSITIVE	Sweet
PI_152923	PHOTOPERIOD_INSENSITIVE	Cellulosic
PI_152961	PHOTOPERIOD_INSENSITIVE	Sweet
PI_152963	PHOTOPERIOD_SENSITIVE	Cellulosic
PI_152965	PHOTOPERIOD_INSENSITIVE	Sweet
PI_152966	PHOTOPERIOD_INSENSITIVE	Sweet
PI_152967	PHOTOPERIOD_INSENSITIVE	Sweet
PI_152971	PHOTOPERIOD_INSENSITIVE	Sweet
PI_153877	PHOTOPERIOD_SENSITIVE	Cellulosic
PI_154750	PHOTOPERIOD_SENSITIVE	Cellulosic
PI_154844	PHOTOPERIOD_SENSITIVE	Sweet
PI_154846	PHOTOPERIOD_SENSITIVE	Sweet
PI_154944	PHOTOPERIOD_INSENSITIVE	Cellulosic
PI_154987	PHOTOPERIOD_SENSITIVE	Sweet
PI_154988	PHOTOPERIOD_INSENSITIVE	Cellulosic
PI_155149	PHOTOPERIOD_SENSITIVE	Sweet
PI_155516	PHOTOPERIOD_SENSITIVE	Cellulosic
PI_155760	PHOTOPERIOD_INSENSITIVE	Cellulosic
PI_155885	PHOTOPERIOD_SENSITIVE	Cellulosic
PI_156018	PHOTOPERIOD_SENSITIVE	Cellulosic
PI_156178	PHOTOPERIOD_SENSITIVE	Cellulosic
PI_156203	PHOTOPERIOD_SENSITIVE	Cellulosic
PI_156217	PHOTOPERIOD_SENSITIVE	Cellulosic
PI_156268	PHOTOPERIOD_SENSITIVE	Cellulosic
PI_156326	PHOTOPERIOD_SENSITIVE	Cellulosic
PI_156330	PHOTOPERIOD_SENSITIVE	Cellulosic
PI_156393	PHOTOPERIOD_SENSITIVE	Cellulosic
PI_156463	PHOTOPERIOD_SENSITIVE	Cellulosic
PI_156487	PHOTOPERIOD_SENSITIVE	Cellulosic
PI_156871	PHOTOPERIOD_SENSITIVE	Cellulosic
PI_156890	PHOTOPERIOD_INSENSITIVE	Sweet
PI_157030	PHOTOPERIOD_SENSITIVE	Cellulosic
PI_157033	PHOTOPERIOD_SENSITIVE	Sweet
PI_157035	PHOTOPERIOD_SENSITIVE	Sweet
PI_157804	PHOTOPERIOD_INSENSITIVE	Cellulosic
PI_167093	PHOTOPERIOD_INSENSITIVE	Sweet
PI_170787	PHOTOPERIOD_INSENSITIVE	Sweet
PI_175919	PHOTOPERIOD_INSENSITIVE	Sweet
PI_176766	PHOTOPERIOD_INSENSITIVE	Cellulosic
PI_179749	PHOTOPERIOD_INSENSITIVE	Cellulosic
PI_180348	PHOTOPERIOD_INSENSITIVE	Sweet
PI_181080	PHOTOPERIOD_INSENSITIVE	Cellulosic
PI_181083	PHOTOPERIOD_INSENSITIVE	Cellulosic
PI_181899	PHOTOPERIOD_INSENSITIVE	Cellulosic
PI_195754	PHOTOPERIOD_INSENSITIVE	Sweet
PI_196049	PHOTOPERIOD_SENSITIVE	Sweet
PI_196583	PHOTOPERIOD_INSENSITIVE	Sweet
PI_196586	PHOTOPERIOD_INSENSITIVE	Sweet
PI_196598	PHOTOPERIOD_INSENSITIVE	GRAIN
PI_197542	PHOTOPERIOD_INSENSITIVE	Cellulosic
PI_19770	PHOTOPERIOD_INSENSITIVE	Sweet
PI_213900	PHOTOPERIOD_INSENSITIVE	Cellulosic
PI_217691	PHOTOPERIOD_INSENSITIVE	Cellulosic
PI_218112	PHOTOPERIOD_INSENSITIVE	Sweet
PI_221548	PHOTOPERIOD_INSENSITIVE	Sweet
PI_221651	PHOTOPERIOD_SENSITIVE	Cellulosic
PI_226096	PHOTOPERIOD_INSENSITIVE	Cellulosic
PI_22913	PHOTOPERIOD_INSENSITIVE	Sweet
PI_229841	PHOTOPERIOD_INSENSITIVE	Cellulosic
PI_250583	PHOTOPERIOD_INSENSITIVE	Sweet
PI_251672	PHOTOPERIOD_INSENSITIVE	Sweet
PI_253986	PHOTOPERIOD_INSENSITIVE	Cellulosic
PI_255239	PHOTOPERIOD_SENSITIVE	Sweet
PI_255744	PHOTOPERIOD_INSENSITIVE	Cellulosic
PI_257599	PHOTOPERIOD_INSENSITIVE	Sweet
PI_257600	PHOTOPERIOD_INSENSITIVE	Sweet
PI_266927	PHOTOPERIOD_SENSITIVE	Cellulosic
PI_267573	PHOTOPERIOD_SENSITIVE	Cellulosic
PI_273465	PHOTOPERIOD_SENSITIVE	Cellulosic
PI_273969	PHOTOPERIOD_INSENSITIVE	Sweet
PI_276837	PHOTOPERIOD_INSENSITIVE	Sweet
PI_291246	PHOTOPERIOD_INSENSITIVE	Sweet
PI_297130	PHOTOPERIOD_SENSITIVE	Sweet
PI_297155	PHOTOPERIOD_INSENSITIVE	Cellulosic
PI_297171	PHOTOPERIOD_SENSITIVE	Cellulosic
PI_300117	PHOTOPERIOD_SENSITIVE	Sweet
PI_300118	PHOTOPERIOD_INSENSITIVE	Cellulosic
PI_300119	PHOTOPERIOD_INSENSITIVE	Cellulosic
PI_302252	PHOTOPERIOD_INSENSITIVE	Sweet
PI_303658	PHOTOPERIOD_INSENSITIVE	Sweet
PI_329256	PHOTOPERIOD_SENSITIVE	Sweet
PI_329286	PHOTOPERIOD_SENSITIVE	Cellulosic
PI_329299	PHOTOPERIOD_SENSITIVE	Cellulosic
PI_329300	PHOTOPERIOD_SENSITIVE	Cellulosic
PI_329301	PHOTOPERIOD_SENSITIVE	Sweet
PI_329310	PHOTOPERIOD_SENSITIVE	Sweet
PI_329319	PHOTOPERIOD_SENSITIVE	Cellulosic
PI_329326	PHOTOPERIOD_SENSITIVE	Cellulosic
PI_329333	PHOTOPERIOD_SENSITIVE	Cellulosic
PI_329338	PHOTOPERIOD_INSENSITIVE	Cellulosic
PI_329351	PHOTOPERIOD_SENSITIVE	Cellulosic
PI_329394	PHOTOPERIOD_SENSITIVE	Sweet
PI_329403	PHOTOPERIOD_SENSITIVE	Sweet
PI_329435	PHOTOPERIOD_INSENSITIVE	Cellulosic
PI_329440	PHOTOPERIOD_INSENSITIVE	Sweet
PI_329465	PHOTOPERIOD_SENSITIVE	Sweet
PI_329466	PHOTOPERIOD_INSENSITIVE	Cellulosic
PI_329471	PHOTOPERIOD_SENSITIVE	Cellulosic
PI_329473	PHOTOPERIOD_SENSITIVE	GRAIN
PI_329478	PHOTOPERIOD_SENSITIVE	Cellulosic
PI_329480	PHOTOPERIOD_SENSITIVE	Cellulosic
PI_329501	PHOTOPERIOD_SENSITIVE	Cellulosic
PI_329506	PHOTOPERIOD_SENSITIVE	Cellulosic
PI_329510	PHOTOPERIOD_SENSITIVE	Cellulosic
PI_329511	PHOTOPERIOD_SENSITIVE	Sweet
PI_329517	PHOTOPERIOD_SENSITIVE	Cellulosic
PI_329518	PHOTOPERIOD_SENSITIVE	Cellulosic
PI_329519	PHOTOPERIOD_SENSITIVE	Cellulosic
PI_329541	PHOTOPERIOD_SENSITIVE	Cellulosic
PI_329545	PHOTOPERIOD_SENSITIVE	Cellulosic
PI_329546	PHOTOPERIOD_SENSITIVE	Cellulosic
PI_329550	PHOTOPERIOD_SENSITIVE	Cellulosic
PI_329551	PHOTOPERIOD_SENSITIVE	Cellulosic
PI_329554	PHOTOPERIOD_SENSITIVE	Cellulosic
PI_329569	PHOTOPERIOD_SENSITIVE	Cellulosic
PI_329570	PHOTOPERIOD_SENSITIVE	Cellulosic
PI_329583	PHOTOPERIOD_SENSITIVE	Cellulosic
PI_329584	PHOTOPERIOD_SENSITIVE	Cellulosic
PI_329585	PHOTOPERIOD_SENSITIVE	Cellulosic
PI_329605	PHOTOPERIOD_SENSITIVE	Cellulosic
PI_329614	PHOTOPERIOD_SENSITIVE	Cellulosic
PI_329615	PHOTOPERIOD_SENSITIVE	Cellulosic
PI_329617	PHOTOPERIOD_SENSITIVE	Cellulosic
PI_329618	PHOTOPERIOD_SENSITIVE	Cellulosic
PI_329632	PHOTOPERIOD_SENSITIVE	Cellulosic
PI_329644	PHOTOPERIOD_SENSITIVE	Cellulosic
PI_329645	PHOTOPERIOD_SENSITIVE	Sweet
PI_329646	PHOTOPERIOD_SENSITIVE	Cellulosic
PI_329665	PHOTOPERIOD_SENSITIVE	Cellulosic
PI_329673	PHOTOPERIOD_SENSITIVE	Cellulosic
PI_329699	PHOTOPERIOD_INSENSITIVE	Sweet
PI_329702	PHOTOPERIOD_SENSITIVE	Cellulosic
PI_329710	PHOTOPERIOD_SENSITIVE	Cellulosic
PI_329711	PHOTOPERIOD_SENSITIVE	Cellulosic
PI_329841	PHOTOPERIOD_SENSITIVE	Sweet
PI_329843	PHOTOPERIOD_SENSITIVE	Cellulosic
PI_329864	PHOTOPERIOD_INSENSITIVE	Sweet
PI_329865	PHOTOPERIOD_SENSITIVE	Cellulosic
PI_330167	PHOTOPERIOD_SENSITIVE	Sweet
PI_330168	PHOTOPERIOD_SENSITIVE	Cellulosic
PI_330169	PHOTOPERIOD_SENSITIVE	Sweet
PI_330181	PHOTOPERIOD_SENSITIVE	Sweet
PI_330182	PHOTOPERIOD_SENSITIVE	Sweet
PI_330184	PHOTOPERIOD_SENSITIVE	Sweet
PI_330185	PHOTOPERIOD_SENSITIVE	Sweet
PI_330195	PHOTOPERIOD_SENSITIVE	Sweet
PI_330196	PHOTOPERIOD_SENSITIVE	Cellulosic
PI_330199	PHOTOPERIOD_INSENSITIVE	Sweet
PI_330796	PHOTOPERIOD_SENSITIVE	Cellulosic
PI_330803	PHOTOPERIOD_SENSITIVE	Cellulosic
PI_330807	PHOTOPERIOD_SENSITIVE	Cellulosic
PI_330833	PHOTOPERIOD_SENSITIVE	Cellulosic
PI_330858	PHOTOPERIOD_SENSITIVE	Cellulosic
PI_337680	PHOTOPERIOD_SENSITIVE	Cellulosic
PI_337689	PHOTOPERIOD_INSENSITIVE	Cellulosic
PI_35038	PHOTOPERIOD_INSENSITIVE	Cellulosic
PI_365512	PHOTOPERIOD_INSENSITIVE	Cellulosic
PI_452542	PHOTOPERIOD_SENSITIVE	Sweet
PI_452544	PHOTOPERIOD_SENSITIVE	Cellulosic
PI_452619	PHOTOPERIOD_SENSITIVE	Sweet
PI_452692	PHOTOPERIOD_SENSITIVE	Cellulosic
PI_453106	PHOTOPERIOD_SENSITIVE	Sweet
PI_453177	PHOTOPERIOD_SENSITIVE	Cellulosic
PI_453696	PHOTOPERIOD_SENSITIVE	Cellulosic
PI_455217	PHOTOPERIOD_SENSITIVE	Cellulosic
PI_455221	PHOTOPERIOD_SENSITIVE	Sweet
PI_455280	PHOTOPERIOD_SENSITIVE	Cellulosic
PI_455301	PHOTOPERIOD_SENSITIVE	Cellulosic
PI_455307	PHOTOPERIOD_SENSITIVE	Cellulosic
PI_505717	PHOTOPERIOD_SENSITIVE	Cellulosic
PI_505722	PHOTOPERIOD_SENSITIVE	Cellulosic
PI_505735	PHOTOPERIOD_INSENSITIVE	Sweet
PI_506030	PHOTOPERIOD_SENSITIVE	Cellulosic
PI_506069	PHOTOPERIOD_SENSITIVE	Cellulosic
PI_506114	PHOTOPERIOD_SENSITIVE	Cellulosic
PI_506122	PHOTOPERIOD_SENSITIVE	Cellulosic
PI_508366	PHOTOPERIOD_SENSITIVE	Cellulosic
PI_510757	PHOTOPERIOD_SENSITIVE	Cellulosic
PI_511355	PHOTOPERIOD_INSENSITIVE	Sweet
PI_513898	PHOTOPERIOD_SENSITIVE	Cellulosic
PI_514456	PHOTOPERIOD_SENSITIVE	Cellulosic
PI_521019	PHOTOPERIOD_SENSITIVE	Cellulosic
PI_521152	PHOTOPERIOD_SENSITIVE	Cellulosic
PI_521280	PHOTOPERIOD_SENSITIVE	Cellulosic
PI_521281	PHOTOPERIOD_SENSITIVE	Cellulosic
PI_521290	PHOTOPERIOD_SENSITIVE	Sweet
PI_524475	PHOTOPERIOD_SENSITIVE	Cellulosic
PI_525049	PHOTOPERIOD_SENSITIVE	Cellulosic
PI_52606	PHOTOPERIOD_INSENSITIVE	GRAIN
PI_526905	PHOTOPERIOD_INSENSITIVE	GRAIN
PI_527045	PHOTOPERIOD_INSENSITIVE	GRAIN
PI_533792	PHOTOPERIOD_INSENSITIVE	GRAIN
PI_533902	PHOTOPERIOD_INSENSITIVE	GRAIN
PI_533998	PHOTOPERIOD_INSENSITIVE	GRAIN
PI_534120	PHOTOPERIOD_INSENSITIVE	GRAIN
PI_534165	PHOTOPERIOD_INSENSITIVE	GRAIN
PI_535783	PHOTOPERIOD_INSENSITIVE	Sweet
PI_535785	PHOTOPERIOD_INSENSITIVE	Sweet
PI_535792	PHOTOPERIOD_INSENSITIVE	GRAIN
PI_535793	PHOTOPERIOD_INSENSITIVE	Sweet
PI_535794	PHOTOPERIOD_INSENSITIVE	GRAIN
PI_535795	PHOTOPERIOD_INSENSITIVE	Sweet
PI_535796	PHOTOPERIOD_INSENSITIVE	Sweet
PI_540518	PHOTOPERIOD_INSENSITIVE	Cellulosic
PI_542718	PHOTOPERIOD_INSENSITIVE	GRAIN
PI_550604	PHOTOPERIOD_INSENSITIVE	GRAIN
PI_552851	PHOTOPERIOD_SENSITIVE	Sweet
PI_561840	PHOTOPERIOD_INSENSITIVE	GRAIN
PI_562717	PHOTOPERIOD_INSENSITIVE	Cellulosic
PI_562730	PHOTOPERIOD_INSENSITIVE	Sweet
PI_562732	PHOTOPERIOD_SENSITIVE	Sweet
PI_562781	PHOTOPERIOD_SENSITIVE	Cellulosic
PI_562897	PHOTOPERIOD_SENSITIVE	Cellulosic
PI_562970	PHOTOPERIOD_SENSITIVE	Cellulosic
PI_562971	PHOTOPERIOD_SENSITIVE	Cellulosic
PI_562981	PHOTOPERIOD_SENSITIVE	Cellulosic
PI_562982	PHOTOPERIOD_SENSITIVE	Cellulosic
PI_562985	PHOTOPERIOD_SENSITIVE	Cellulosic
PI_562990	PHOTOPERIOD_SENSITIVE	Cellulosic
PI_562991	PHOTOPERIOD_SENSITIVE	Cellulosic
PI_562994	PHOTOPERIOD_SENSITIVE	Cellulosic
PI_562997	PHOTOPERIOD_SENSITIVE	Cellulosic
PI_562998	PHOTOPERIOD_SENSITIVE	Cellulosic
PI_563002	PHOTOPERIOD_SENSITIVE	Cellulosic
PI_563006	PHOTOPERIOD_SENSITIVE	Cellulosic
PI_563009	PHOTOPERIOD_SENSITIVE	Cellulosic
PI_563020	PHOTOPERIOD_SENSITIVE	Cellulosic
PI_563021	PHOTOPERIOD_SENSITIVE	Cellulosic
PI_563022	PHOTOPERIOD_SENSITIVE	Cellulosic
PI_563032	PHOTOPERIOD_INSENSITIVE	Sweet
PI_563196	PHOTOPERIOD_SENSITIVE	Cellulosic
PI_563222	PHOTOPERIOD_SENSITIVE	Cellulosic
PI_563295	PHOTOPERIOD_SENSITIVE	Sweet
PI_563329	PHOTOPERIOD_SENSITIVE	Sweet
PI_563330	PHOTOPERIOD_SENSITIVE	Sweet
PI_563331	PHOTOPERIOD_SENSITIVE	Sweet
PI_563332	PHOTOPERIOD_SENSITIVE	Cellulosic
PI_563338	PHOTOPERIOD_SENSITIVE	Cellulosic
PI_563348	PHOTOPERIOD_SENSITIVE	Cellulosic
PI_563350	PHOTOPERIOD_SENSITIVE	Cellulosic
PI_563355	PHOTOPERIOD_SENSITIVE	Cellulosic
PI_564163	PHOTOPERIOD_INSENSITIVE	GRAIN
PI_566819	PHOTOPERIOD_INSENSITIVE	Sweet
PI_568717	PHOTOPERIOD_SENSITIVE	Cellulosic
PI_569090	PHOTOPERIOD_INSENSITIVE	Cellulosic
PI_569097	PHOTOPERIOD_SENSITIVE	Cellulosic
PI_569148	PHOTOPERIOD_SENSITIVE	Sweet
PI_569244	PHOTOPERIOD_INSENSITIVE	Sweet
PI_569264	PHOTOPERIOD_SENSITIVE	Cellulosic
PI_569416	PHOTOPERIOD_SENSITIVE	Cellulosic
PI_569418	PHOTOPERIOD_SENSITIVE	Cellulosic
PI_569419	PHOTOPERIOD_SENSITIVE	Cellulosic
PI_569420	PHOTOPERIOD_SENSITIVE	Cellulosic
PI_569421	PHOTOPERIOD_SENSITIVE	Cellulosic
PI_569422	PHOTOPERIOD_SENSITIVE	Cellulosic
PI_569423	PHOTOPERIOD_SENSITIVE	Cellulosic
PI_569425	PHOTOPERIOD_SENSITIVE	Cellulosic
PI_569427	PHOTOPERIOD_SENSITIVE	Cellulosic
PI_569433	PHOTOPERIOD_SENSITIVE	Cellulosic
PI_569435	PHOTOPERIOD_SENSITIVE	Cellulosic
PI_569443	PHOTOPERIOD_SENSITIVE	Cellulosic
PI_569444	PHOTOPERIOD_SENSITIVE	Cellulosic
PI_569445	PHOTOPERIOD_SENSITIVE	Cellulosic
PI_569446	PHOTOPERIOD_SENSITIVE	Cellulosic
PI_569447	PHOTOPERIOD_SENSITIVE	Cellulosic
PI_569452	PHOTOPERIOD_SENSITIVE	Sweet
PI_569453	PHOTOPERIOD_SENSITIVE	Cellulosic
PI_569454	PHOTOPERIOD_SENSITIVE	Cellulosic
PI_569455	PHOTOPERIOD_SENSITIVE	Cellulosic
PI_569457	PHOTOPERIOD_SENSITIVE	Cellulosic
PI_569458	PHOTOPERIOD_SENSITIVE	Cellulosic
PI_569459	PHOTOPERIOD_SENSITIVE	Cellulosic
PI_569460	PHOTOPERIOD_SENSITIVE	Cellulosic
PI_569462	PHOTOPERIOD_SENSITIVE	Cellulosic
PI_569465	PHOTOPERIOD_SENSITIVE	Cellulosic
PI_569886	PHOTOPERIOD_SENSITIVE	Cellulosic
PI_570031	PHOTOPERIOD_SENSITIVE	Cellulosic
PI_570038	PHOTOPERIOD_SENSITIVE	Cellulosic
PI_570039	PHOTOPERIOD_SENSITIVE	Cellulosic
PI_570042	PHOTOPERIOD_SENSITIVE	Cellulosic
PI_570047	PHOTOPERIOD_SENSITIVE	Cellulosic
PI_570053	PHOTOPERIOD_SENSITIVE	Cellulosic
PI_570071	PHOTOPERIOD_SENSITIVE	Cellulosic
PI_570073	PHOTOPERIOD_SENSITIVE	Cellulosic
PI_570074	PHOTOPERIOD_SENSITIVE	Cellulosic
PI_570075	PHOTOPERIOD_SENSITIVE	Cellulosic
PI_570076	PHOTOPERIOD_SENSITIVE	Cellulosic
PI_570085	PHOTOPERIOD_SENSITIVE	Cellulosic
PI_570087	PHOTOPERIOD_SENSITIVE	Cellulosic
PI_570090	PHOTOPERIOD_SENSITIVE	Cellulosic
PI_570091	PHOTOPERIOD_SENSITIVE	Cellulosic
PI_570096	PHOTOPERIOD_SENSITIVE	Cellulosic
PI_570106	PHOTOPERIOD_SENSITIVE	Cellulosic
PI_570109	PHOTOPERIOD_SENSITIVE	Cellulosic
PI_570110	PHOTOPERIOD_SENSITIVE	Cellulosic
PI_570114	PHOTOPERIOD_SENSITIVE	Cellulosic
PI_570145	PHOTOPERIOD_SENSITIVE	Cellulosic
PI_570254	PHOTOPERIOD_SENSITIVE	Cellulosic
PI_570371	PHOTOPERIOD_SENSITIVE	Cellulosic
PI_570373	PHOTOPERIOD_SENSITIVE	Cellulosic
PI_570388	PHOTOPERIOD_SENSITIVE	Sweet
PI_570393	PHOTOPERIOD_SENSITIVE	Cellulosic
PI_570400	PHOTOPERIOD_SENSITIVE	Cellulosic
PI_570431	PHOTOPERIOD_SENSITIVE	Sweet
PI_573193	PHOTOPERIOD_SENSITIVE	Cellulosic
PI_576399	PHOTOPERIOD_INSENSITIVE	Sweet
PI_576401	PHOTOPERIOD_INSENSITIVE	GRAIN
PI_583832	PHOTOPERIOD_INSENSITIVE	Sweet
PI_585406	PHOTOPERIOD_INSENSITIVE	Cellulosic
PI_585448	PHOTOPERIOD_SENSITIVE	Cellulosic
PI_585452	PHOTOPERIOD_SENSITIVE	Cellulosic
PI_585454	PHOTOPERIOD_SENSITIVE	Cellulosic
PI_585461	PHOTOPERIOD_SENSITIVE	Cellulosic
PI_585467	PHOTOPERIOD_SENSITIVE	Cellulosic
PI_585577	PHOTOPERIOD_SENSITIVE	Cellulosic
PI_585608	PHOTOPERIOD_SENSITIVE	Cellulosic
PI_585954	PHOTOPERIOD_SENSITIVE	Cellulosic
PI_585961	PHOTOPERIOD_SENSITIVE	Cellulosic
PI_585966	PHOTOPERIOD_SENSITIVE	Cellulosic
PI_586435	PHOTOPERIOD_INSENSITIVE	Sweet
PI_586443	PHOTOPERIOD_INSENSITIVE	Sweet
PI_586499	PHOTOPERIOD_INSENSITIVE	Sweet
PI_586541	PHOTOPERIOD_INSENSITIVE	Sweet
PI_593916	PHOTOPERIOD_INSENSITIVE	GRAIN
PI_619807	PHOTOPERIOD_SENSITIVE	Sweet
PI_619838	PHOTOPERIOD_SENSITIVE	Cellulosic
PI_620072	PHOTOPERIOD_SENSITIVE	Cellulosic
PI_620157	PHOTOPERIOD_SENSITIVE	Cellulosic
PI_63715	PHOTOPERIOD_INSENSITIVE	Sweet
PI_641807	PHOTOPERIOD_INSENSITIVE	Sweet
PI_641810	PHOTOPERIOD_INSENSITIVE	Sweet
PI_641815	PHOTOPERIOD_INSENSITIVE	Sweet
PI_641817	PHOTOPERIOD_INSENSITIVE	Sweet
PI_641821	PHOTOPERIOD_INSENSITIVE	Cellulosic
PI_641824	PHOTOPERIOD_INSENSITIVE	Sweet
PI_641829	PHOTOPERIOD_INSENSITIVE	Sweet
PI_641830	PHOTOPERIOD_INSENSITIVE	Cellulosic
PI_641834	PHOTOPERIOD_INSENSITIVE	Sweet
PI_641835	PHOTOPERIOD_INSENSITIVE	Sweet
PI_641836	PHOTOPERIOD_INSENSITIVE	Sweet
PI_641850	PHOTOPERIOD_INSENSITIVE	Sweet
PI_641860	PHOTOPERIOD_INSENSITIVE	Sweet
PI_641862	PHOTOPERIOD_INSENSITIVE	Sweet
PI_641892	PHOTOPERIOD_INSENSITIVE	Cellulosic
PI_641909	PHOTOPERIOD_INSENSITIVE	Cellulosic
PI_642998	PHOTOPERIOD_INSENSITIVE	Cellulosic
PI_643008	PHOTOPERIOD_INSENSITIVE	Sweet
PI_643016	PHOTOPERIOD_SENSITIVE	Sweet
PI_646242	PHOTOPERIOD_SENSITIVE	Cellulosic
PI_646251	PHOTOPERIOD_SENSITIVE	Cellulosic
PI_646266	PHOTOPERIOD_SENSITIVE	Cellulosic
PI_651491	PHOTOPERIOD_INSENSITIVE	Sweet
PI_651493	PHOTOPERIOD_INSENSITIVE	Sweet
PI_651495	PHOTOPERIOD_INSENSITIVE	Sweet
PI_651496	PHOTOPERIOD_INSENSITIVE	Sweet
PI_651497	PHOTOPERIOD_INSENSITIVE	Sweet
PI_653616	PHOTOPERIOD_INSENSITIVE	Sweet
PI_653617	PHOTOPERIOD_INSENSITIVE	Sweet
PI_655972	PHOTOPERIOD_INSENSITIVE	Cellulosic
PI_655978	PHOTOPERIOD_INSENSITIVE	GRAIN
PI_655981	PHOTOPERIOD_INSENSITIVE	Cellulosic
PI_655983	PHOTOPERIOD_INSENSITIVE	Sweet
PI_656015	PHOTOPERIOD_INSENSITIVE	Sweet
PI_656026	PHOTOPERIOD_INSENSITIVE	GRAIN
PI_656035	PHOTOPERIOD_INSENSITIVE	Cellulosic
PI_656065	PHOTOPERIOD_INSENSITIVE	Cellulosic
PI_92270	PHOTOPERIOD_INSENSITIVE	Sweet
ATLAS	PHOTOPERIOD_INSENSITIVE	Sweet
LEOTI	PHOTOPERIOD_INSENSITIVE	Sweet
RIO	PHOTOPERIOD_INSENSITIVE	Sweet
WRAY	PHOTOPERIOD_INSENSITIVE	Sweet

## Sheet: Correlation_Table S3
	S Table 3: Pearson correlation coefficients of phenotypes in the bioenergy association panel (BAP).
	Traits	Stalk height	Maturity	Fresh weight	Brix (%)	Dry weight	ADF	NDF	NFC
	Stalk Height	-
	Maturity	0.72***	-
	Fresh Weight	0.71***	0.59***	-
	Brix (%)	-0.01ns	-0.24***	-0.01ns	-
	Dry Weight	0.68***	0.44***	0.73***	0.28***	-
	ADF	0.36***	0.41***	0.15**	-0.56***	0.00ns	-
	NDF	0.21***	0.17***	0.02ns	-0.58***	-0.10*	0.82***	-
	NFC	-0.03ns	-0.07ns	0.10*	0.64***	0.24***	-0.78***	-0.96***	-
	Lignin	0.55***	0.49***	0.30***	-0.40***	0.21***	0.81***	0.73***	-0.63***
	*Significance at 0.05 probability.
	**Significance at 0.01 probability.
	***Significance at 0.001 probability.

## Sheet: GWAS_Table S4
	Trait	SNP	CHROM	POS	REF	ALT	Effect	SE	Significance	Model
	SC	Chr01-68367032	Chr01	68367032	C	G	-0.255657	0.0381078	8.61596e-11	MLM
		Chr01-68401502	Chr01	68401502	G	GT	0.204078	0.0304788	9.32033e-11	MLM
		Chr01-68407339	Chr01	68407339	C	T	0.160561	0.0164598	5.50198e-23	FarmCPU
		Chr02-53767385	Chr02	53767385	C	T	0.19477	0.0345389	1.30166e-09	FarmCPU
		Chr02-62085143	Chr02	62085143	G	GCGACGAGGCCCTGGT	0.199742	0.0238632	7.71266e-18	FarmCPU
		Chr02-63553587	Chr02	63553587	G	T	0.0853441	0.0167717	5.69575e-09	FarmCPU
		Chr04-54654878	Chr04	54654878	A	G	0.154596	0.0255183	3.39097e-11	FarmCPU
		Chr04-58220148	Chr04	58220148	G	A	0.204502	0.0198143	6.00056e-25	FarmCPU
		Chr06-42602931	Chr06	42602931	C	T	0.183364	0.0365943	5.56961e-09	FarmCPU
		Chr07-62840682	Chr07	62840682	C	T	0.194647	0.0312171	6.82964e-12	FarmCPU
		Chr08-13157060	Chr08	13157060	T	C	-0.164697	0.0275491	3.10683e-12	FarmCPU
		Chr10-60112564	Chr10	60112564	A	T	0.106774	0.0189506	2.26337e-10	FarmCPU
	PH	Chr01-20134329	Chr01	20134329	C	T	-25.3328	4.81372	1.20499e-09	FarmCPU
		Chr04-5182079	Chr04	5182079	C	A	-26.7704	4.73039	4.21965e-10	FarmCPU
		Chr06-12822695	Chr06	12822695	T	C	39.0306	5.97114	1.17484e-12	FarmCPU
		Chr06-42867057	Chr06	42867057	G	GA	-88.9766	14.669	3.67363e-09	MLM
		Chr07-2812493	Chr07	2812493	T	C	17.9208	3.62226	8.52605e-09	FarmCPU
		Chr08-888245	Chr08	888245	A	G	25.1909	3.99466	1.36276e-11	FarmCPU
		Chr09-57040002	Chr09	57040002	T	A	69.6911	11.7318	7.35492e-09	MLM+FarmCPU
		Chr10-1841997	Chr10	1841997	G	A	21.5031	3.69991	2.53389e-10	FarmCPU
		Chr10-12494420	Chr10	12494420	C	T	40.6923	5.68048	1.52371e-14	FarmCPU
	DTH	Chr01-17500538	Chr01	17500538	A	G	3.59154	0.49064	9.0932e-16	FarmCPU
		Chr04-12331083	Chr04	12331083	T	C	-5.6391	1.0575	2.42267e-09	FarmCPU
		Chr04-27725942	Chr04	27725942	G	A	-5.26949	0.961277	9.10691e-13	FarmCPU
		Chr06-1837917	Chr06	1837917	A	G	4.32064	0.534175	1.05068e-17	FarmCPU
		Chr06-40263069	Chr06	40263069	T	C	-8.60393	1.4406	6.17962e-09	MLM
		Chr06-40491020	Chr06	40491020	G	T	-10.1773	1.62327	1.16275e-09	MLM
		Chr06-40492228	Chr06	40492228	T	A	-10.2664	1.63677	1.14471e-09	MLM
		Chr06-40492264	Chr06	40492264	CA	C	-10.2664	1.63677	1.14471e-09	MLM
		Chr06-40492351	Chr06	40492351	A	G	-10.1773	1.62327	1.16275e-09	MLM
		Chr06-40492968	Chr06	40492968	T	A	-10.1773	1.62327	1.16275e-09	MLM
		Chr06-40493218	Chr06	40493218	T	G	-10.1773	1.62327	1.16275e-09	MLM
		Chr06-40493983	Chr06	40493983	G	A	-8.48535	0.935951	1.37183e-20	MLM+FarmCPU
		Chr06-40559247	Chr06	40559247	T	A	-11.5992	1.69353	3.77778e-11	MLM
		Chr06-40571815	Chr06	40571815	G	A	-8.3708	1.33292	1.09533e-09	MLM
		Chr06-40585501	Chr06	40585501	G	A	-9.08271	1.49002	3.11344e-09	MLM
		Chr06-40693011	Chr06	40693011	A	T	-9.60529	1.48415	3.60419e-10	MLM
		Chr06-41098789	Chr06	41098789	C	G	-10.7795	1.82596	9.02799e-09	MLM
		Chr06-41477213	Chr06	41477213	C	T	-12.3042	1.94135	7.85145e-10	MLM
		Chr09-58757856	Chr09	58757856	G	A	3.48723	0.653872	7.56059e-10	FarmCPU
		Chr10-49363752	Chr10	49363752	AG	A	-5.40002	1.00877	2.05357e-10	FarmCPU
		Chr10-54310441	Chr10	54310441	A	AT	-10.5974	1.50128	5.31369e-14	FarmCPU
	FW	Chr01-32300681	Chr01	32300681	T	C	1.01759	0.162531	1.29008e-12	FarmCPU
		Chr01-65630690	Chr01	65630690	G	A	1.2474	0.180583	2.64065e-11	MLM+FarmCPU
		Chr01-65630747	Chr01	65630747	C	T	0.943847	0.155291	3.43922e-09	MLM
		Chr02-77472104	Chr02	77472104	T	A	0.889598	0.141234	9.83835e-10	MLM
		Chr02-77614911	Chr02	77614911	C	T	0.872953	0.142683	2.74571e-09	MLM
		Chr05-1912326	Chr05	1912326	G	A	0.296082	0.0544071	4.66654e-10	FarmCPU
		Chr05-52717251	Chr05	52717251	T	C	0.999224	0.161132	1.71637e-09	MLM
		Chr05-52717281	Chr05	52717281	A	G	0.999224	0.161132	1.71637e-09	MLM
		Chr05-52717775	Chr05	52717775	T	G	0.990571	0.155906	7.1718e-10	MLM
		Chr06-48272492	Chr06	48272492	A	T	-0.426523	0.0670519	6.51439e-12	FarmCPU
		Chr07-1414259	Chr07	1414259	A	G	1.70041	0.276678	2.34932e-09	MLM
		Chr08-689420	Chr08	689420	G	T	-0.257676	0.0484852	5.51187e-09	FarmCPU
		Chr08-40365254	Chr08	40365254	C	T	-0.720237	0.119483	4.54503e-09	MLM
		Chr08-40365257	Chr08	40365257	C	T	-0.720237	0.119483	4.54503e-09	MLM
		Chr08-40365266	Chr08	40365266	G	A	-0.679869	0.114845	8.25139e-09	MLM
		Chr08-40365292	Chr08	40365292	A	T	-0.714685	0.118232	4.13917e-09	MLM
		Chr08-40365336	Chr08	40365336	C	T	-0.698667	0.116505	5.39861e-09	MLM
		Chr08-61151122	Chr08	61151122	T	C	0.361102	0.0783953	4.24904e-09	FarmCPU
		Chr09-59321818	Chr09	59321818	G	A	1.1031	0.178432	1.91291e-09	MLM
	DW	Chr01-28742846	Chr01	28742846	T	C	0.363055	0.0602313	4.53829e-09	MLM
		Chr01-32299256	Chr01	32299256	A	G	0.350914	0.0525248	1.04017e-10	MLM
		Chr01-32300627	Chr01	32300627	C	T	0.343039	0.0536115	5.5073e-10	MLM
		Chr01-32300681	Chr01	32300681	T	C	0.353602	0.0539034	2.13848e-10	MLM
		Chr01-32301449	Chr01	32301449	C	T	0.353602	0.0539034	2.13848e-10	MLM
		Chr01-32301462	Chr01	32301462	A	T	0.326638	0.052045	1.11683e-09	MLM
		Chr01-32301466	Chr01	32301466	C	CT	0.353602	0.0539034	2.13848e-10	MLM
		Chr01-32302128	Chr01	32302128	G	A	0.343039	0.0536115	5.5073e-10	MLM
		Chr01-32303171	Chr01	32303171	C	T	0.343039	0.0536115	5.5073e-10	MLM
		Chr01-32303678	Chr01	32303678	A	G	0.348978	0.052439	3.0656e-19	MLM+FarmCPU
		Chr01-32307694	Chr01	32307694	G	A	0.343039	0.0536115	5.5073e-10	MLM
		Chr01-32307697	Chr01	32307697	A	G	0.343039	0.0536115	5.5073e-10	MLM
		Chr01-32307906	Chr01	32307906	T	C	0.353602	0.0539034	2.13848e-10	MLM
		Chr01-32308035	Chr01	32308035	G	A	0.353602	0.0539034	2.13848e-10	MLM
		Chr01-48608148	Chr01	48608148	C	T	-0.246526	0.0402817	2.70756e-09	MLM
		Chr01-48608225	Chr01	48608225	C	T	-0.249119	0.039414	8.64961e-10	MLM
		Chr01-48844844	Chr01	48844844	G	T	-0.2278	0.038279	6.93431e-09	MLM
		Chr02-1305600	Chr02	1305600	G	A	0.085982	0.01655	2.01954e-09	FarmCPU
		Chr02-2167922	Chr02	2167922	C	T	0.183439	0.0289731	8.12869e-10	MLM
		Chr02-2170724	Chr02	2170724	C	T	0.183439	0.0289731	8.12869e-10	MLM
		Chr02-2171901	Chr02	2171901	C	T	0.168195	0.0277973	3.99042e-09	MLM
		Chr02-2172979	Chr02	2172979	C	T	0.168195	0.0277973	3.99042e-09	MLM
		Chr02-2173341	Chr02	2173341	T	G	0.183439	0.0289731	8.12869e-10	MLM
		Chr02-2177594	Chr02	2177594	C	T	0.183439	0.0289731	8.12869e-10	MLM
		Chr02-2177904	Chr02	2177904	C	T	0.183439	0.0289731	8.12869e-10	MLM
		Chr02-2178092	Chr02	2178092	T	A	0.183439	0.0289731	8.12869e-10	MLM
		Chr02-2178299	Chr02	2178299	T	TGTAC	0.183439	0.0289731	8.12869e-10	MLM
		Chr02-2179265	Chr02	2179265	C	T	0.183439	0.0289731	8.12869e-10	MLM
		Chr02-2179349	Chr02	2179349	G	A	0.183439	0.0289731	8.12869e-10	MLM
		Chr02-2179561	Chr02	2179561	T	A	0.163866	0.02681	2.83134e-09	MLM
		Chr02-2179566	Chr02	2179566	A	G	0.183439	0.0289731	8.12869e-10	MLM
		Chr02-2179679	Chr02	2179679	C	T	0.163866	0.02681	2.83134e-09	MLM
		Chr02-2179727	Chr02	2179727	C	T	0.163866	0.02681	2.83134e-09	MLM
		Chr02-2180355	Chr02	2180355	G	A	0.183439	0.0289731	8.12869e-10	MLM
		Chr02-2181040	Chr02	2181040	A	C	0.183439	0.0289731	8.12869e-10	MLM
		Chr02-2182944	Chr02	2182944	A	T	0.181361	0.0293106	1.84967e-09	MLM
		Chr02-2183585	Chr02	2183585	CA	C	0.177905	0.0286602	1.65271e-09	MLM
		Chr02-2183587	Chr02	2183587	A	C	0.183439	0.0289731	8.12869e-10	MLM
		Chr02-2184181	Chr02	2184181	C	T	0.183439	0.0289731	8.12869e-10	MLM
		Chr02-2184499	Chr02	2184499	C	G	0.183439	0.0289731	8.12869e-10	MLM
		Chr02-19392514	Chr02	19392514	C	A	0.209969	0.0348173	4.46527e-09	MLM
		Chr02-21794993	Chr02	21794993	A	G	0.0918014	0.0186115	3.66291e-09	FarmCPU
		Chr02-33275093	Chr02	33275093	G	A	0.228935	0.0382625	5.80506e-09	MLM
		Chr02-36613386	Chr02	36613386	A	C	0.205352	0.0329072	1.37002e-09	MLM
		Chr02-71718580	Chr02	71718580	C	T	0.206262	0.0339742	3.56185e-09	MLM
		Chr02-71718582	Chr02	71718582	G	T	0.206262	0.0339742	3.56185e-09	MLM
		Chr04-1805449	Chr04	1805449	C	T	0.297984	0.0486677	2.66572e-09	MLM
		Chr04-8971818	Chr04	8971818	C	A	0.308612	0.0522867	9.06164e-09	MLM
		Chr04-38103965	Chr04	38103965	G	A	0.29919	0.0496973	4.72963e-09	MLM
		Chr05-6193860	Chr05	6193860	C	G	0.203824	0.0338475	4.6879e-09	MLM
		Chr05-6193864	Chr05	6193864	T	C	0.203824	0.0338475	4.6879e-09	MLM
		Chr05-6633276	Chr05	6633276	C	T	0.186392	0.0313999	7.53041e-09	MLM
		Chr05-6633305	Chr05	6633305	G	C	0.186392	0.0313999	7.53041e-09	MLM
		Chr05-10537135	Chr05	10537135	G	GATAATATCAA	0.228749	0.0345204	1.44017e-10	MLM
		Chr05-11221621	Chr05	11221621	T	C	0.257329	0.0432498	6.98094e-09	MLM
		Chr05-11446674	Chr05	11446674	C	G	0.263516	0.0444288	7.73411e-09	MLM
		Chr05-36335859	Chr05	36335859	TAGAA	T	0.241758	0.0402392	5.06178e-09	MLM
		Chr05-42350772	Chr05	42350772	C	A	0.379281	0.0607414	1.3401e-09	MLM
		Chr05-52740435	Chr05	52740435	T	C	0.1875	0.0304745	2.2527e-09	MLM
		Chr05-52740446	Chr05	52740446	C	T	0.189667	0.030996	2.72249e-09	MLM
		Chr05-52740464	Chr05	52740464	A	AC	0.187863	0.0298922	1.06291e-09	MLM
		Chr05-52740466	Chr05	52740466	G	A	0.187863	0.0298922	1.06291e-09	MLM
		Chr05-52740467	Chr05	52740467	G	C	0.187863	0.0298922	1.06291e-09	MLM
		Chr05-52740471	Chr05	52740471	A	C	0.187863	0.0298922	1.06291e-09	MLM
		Chr05-52740474	Chr05	52740474	TC	T	0.187863	0.0298922	1.06291e-09	MLM
		Chr05-52831342	Chr05	52831342	T	C	0.19076	0.032262	8.55413e-09	MLM
		Chr05-56159869	Chr05	56159869	T	A	0.179603	0.0299094	5.14983e-09	MLM
		Chr05-59785398	Chr05	59785398	G	A	0.169455	0.0287092	9.05337e-09	MLM
		Chr05-60554738	Chr05	60554738	G	T	0.20049	0.0326203	2.33717e-09	MLM
		Chr06-42884132	Chr06	42884132	AT	A	-0.0611212	0.0123701	2.82515e-09	FarmCPU
		Chr06-42964172	Chr06	42964172	C	T	-0.172614	0.0276513	1.35303e-09	MLM
		Chr07-179967	Chr07	179967	C	T	0.331928	0.0561006	8.37635e-09	MLM
		Chr07-179970	Chr07	179970	A	G	0.331928	0.0561006	8.37635e-09	MLM
		Chr07-23046281	Chr07	23046281	A	G	0.433378	0.0637947	5.28092e-11	MLM
		Chr07-55860027	Chr07	55860027	TGGCCAAGTTCCAA	T	0.144481	0.0216045	1.95127e-12	FarmCPU
		Chr07-57796532	Chr07	57796532	C	CTCATAT	0.309555	0.0521527	7.55185e-09	MLM
		Chr07-60434191	Chr07	60434191	C	A	0.0810814	0.0116661	8.96575e-14	FarmCPU
		Chr08-8698	Chr08	8698	G	A	0.163405	0.0275437	7.67583e-09	MLM
		Chr08-11047014	Chr08	11047014	T	C	0.329215	0.0536396	2.45382e-09	MLM
		Chr08-14251376	Chr08	14251376	T	G	0.212173	0.0351657	4.39269e-09	MLM
		Chr08-16398853	Chr08	16398853	A	G	0.351715	0.0574299	2.64429e-09	MLM
		Chr08-50452144	Chr08	50452144	C	T	0.341216	0.0533321	5.52876e-10	MLM
		Chr09-13370672	Chr09	13370672	C	T	0.285951	0.046025	1.60122e-09	MLM
		Chr09-19620349	Chr09	19620349	C	T	0.352599	0.0505381	1.71553e-11	MLM
		Chr09-22767396	Chr09	22767396	C	T	0.418952	0.0634829	1.6917e-10	MLM
		Chr10-11270240	Chr10	11270240	A	T	0.195141	0.0310615	1.07706e-09	MLM
		Chr10-23415002	Chr10	23415002	C	CTGGCCTCATCTCGATGGTGCAGGCAAGTCAGTTATG	0.228538	0.0335976	5.00384e-11	MLM
		Chr10-25056054	Chr10	25056054	G	A	0.195261	0.0329659	8.08492e-09	MLM
		Chr10-25056100	Chr10	25056100	GA	G	0.213417	0.0357696	6.37076e-09	MLM
		Chr10-25056102	Chr10	25056102	C	CATA	0.213417	0.0357696	6.37076e-09	MLM
		Chr10-25056105	Chr10	25056105	GA	G	0.213417	0.0357696	6.37076e-09	MLM
		Chr10-25056508	Chr10	25056508	C	T	0.204068	0.034408	7.74997e-09	MLM
		Chr10-27962088	Chr10	27962088	T	A	0.363929	0.0539276	6.92759e-11	MLM
		Chr10-28180061	Chr10	28180061	G	A	0.404904	0.0618453	2.30778e-10	MLM
		Chr10-32586100	Chr10	32586100	G	A	0.294172	0.0453842	3.38798e-10	MLM
		Chr10-33312481	Chr10	33312481	A	T	0.404904	0.0618453	2.30778e-10	MLM
		Chr10-33504910	Chr10	33504910	A	T	0.384156	0.0632203	3.45741e-09	MLM
		Chr10-33991868	Chr10	33991868	A	G	0.384156	0.0632203	3.45741e-09	MLM
		Chr10-34009647	Chr10	34009647	C	T	0.404904	0.0618453	2.30778e-10	MLM
		Chr10-34063072	Chr10	34063072	G	A	0.384156	0.0632203	3.45741e-09	MLM
		Chr10-34063073	Chr10	34063073	C	G	0.384156	0.0632203	3.45741e-09	MLM
		Chr10-34064460	Chr10	34064460	C	T	0.384156	0.0632203	3.45741e-09	MLM
		Chr10-37808945	Chr10	37808945	A	C	0.384156	0.0632203	3.45741e-09	MLM
		Chr10-37808946	Chr10	37808946	C	T	0.384156	0.0632203	3.45741e-09	MLM
		Chr10-37808947	Chr10	37808947	A	C	0.384156	0.0632203	3.45741e-09	MLM
		Chr10-39186221	Chr10	39186221	T	C	0.276822	0.0468917	9.00592e-09	MLM
		Chr10-50029692	Chr10	50029692	A	ACTGTCGAGTAAGTTTTGCATTCCACTCCACCATTGTAGTATGTAGTAC	0.176003	0.0271287	3.2733e-10	MLM
	Brix %	Chr03-62179527	Chr03	62179527	T	A	-1.11594	0.207471	4.04149e-09	FarmCPU
		Chr06-43928936	Chr06	43928936	A	G	1.62856	0.270981	5.02428e-09	MLM
		Chr08-18730059	Chr08	18730059	T	C	2.25385	0.38453	1.07539e-10	FarmCPU
	ADF	Chr01-8016164	Chr01	8016164	G	A	-5.96333	0.948025	1.08554e-09	MLM
		Chr01-56058205	Chr01	56058205	C	T	-6.18642	0.965783	5.59549e-10	MLM
		Chr01-56251699	Chr01	56251699	C	G	-5.65799	0.939683	4.92302e-09	MLM+FarmCPU
		Chr01-56360672	Chr01	56360672	G	A	-5.57988	0.9243	4.51338e-09	MLM
		Chr03-7198897	Chr03	7198897	A	G	-6.39013	0.96216	1.40502e-10	MLM
		Chr03-7198963	Chr03	7198963	C	T	-5.98737	0.932241	5.07268e-10	MLM
		Chr03-7232517	Chr03	7232517	G	C	-5.29536	0.883466	5.72402e-09	MLM
		Chr03-7232550	Chr03	7232550	C	T	-5.29536	0.883466	5.72402e-09	MLM
		Chr03-7233093	Chr03	7233093	G	C	-5.29536	0.883466	5.72402e-09	MLM
		Chr03-7235014	Chr03	7235014	GA	G	-5.4667	0.91911	7.3712e-09	MLM
		Chr03-7235169	Chr03	7235169	T	G	-5.29536	0.883466	5.72402e-09	MLM
		Chr03-7242365	Chr03	7242365	A	T	-5.11442	0.837291	3.03364e-09	MLM
		Chr03-7244460	Chr03	7244460	A	G	-5.11442	0.837291	3.03364e-09	MLM
		Chr03-7246097	Chr03	7246097	G	A	-5.29536	0.883466	5.72402e-09	MLM
		Chr03-7246212	Chr03	7246212	C	T	-5.29536	0.883466	5.72402e-09	MLM
		Chr03-7246330	Chr03	7246330	A	G	-5.29536	0.883466	5.72402e-09	MLM
		Chr03-7246421	Chr03	7246421	C	A	-5.29536	0.883466	5.72402e-09	MLM
		Chr03-7246548	Chr03	7246548	C	T	-5.29536	0.883466	5.72402e-09	MLM
		Chr03-7246667	Chr03	7246667	T	TG	-5.29536	0.883466	5.72402e-09	MLM
		Chr03-7246789	Chr03	7246789	C	T	-5.29536	0.883466	5.72402e-09	MLM
		Chr03-7247035	Chr03	7247035	G	A	-5.29536	0.883466	5.72402e-09	MLM
		Chr03-7247075	Chr03	7247075	C	T	-5.29536	0.883466	5.72402e-09	MLM
		Chr03-7247541	Chr03	7247541	T	C	-5.29536	0.883466	5.72402e-09	MLM
		Chr03-7249394	Chr03	7249394	G	C	-5.29536	0.883466	5.72402e-09	MLM
		Chr03-7250863	Chr03	7250863	C	A	-5.29536	0.883466	5.72402e-09	MLM
		Chr03-7385645	Chr03	7385645	C	T	-6.09429	0.964857	9.35638e-10	MLM
		Chr03-7388870	Chr03	7388870	C	T	-6.00878	0.959501	1.27238e-09	MLM
		Chr03-7389064	Chr03	7389064	G	A	-6.09429	0.964857	9.35638e-10	MLM
		Chr03-7389075	Chr03	7389075	G	A	-5.30204	0.844405	1.15749e-09	MLM
		Chr03-7389094	Chr03	7389094	G	A	-6.46683	0.939869	3.33832e-11	MLM+FarmCPU
		Chr03-7419896	Chr03	7419896	T	C	-5.44203	0.909229	5.99919e-09	MLM
		Chr06-720286	Chr06	720286	C	T	-5.6743	0.932888	3.50305e-09	MLM
		Chr06-878481	Chr06	878481	G	A	-6.0341	0.95659	9.81359e-10	MLM
		Chr06-1044214	Chr06	1044214	T	C	-6.14098	1.00953	3.49291e-09	MLM
		Chr06-1304604	Chr06	1304604	C	T	-6.30589	0.984884	5.69114e-10	MLM
		Chr06-1310707	Chr06	1310707	G	A	-5.65134	0.921565	2.65192e-09	MLM
		Chr06-43344671	Chr06	43344671	TGTAAAGCTACTAA	T	-5.72401	0.817049	1.5516e-11	MLM
		Chr06-43344828	Chr06	43344828	C	A	-5.34136	0.802661	1.29964e-10	MLM
		Chr06-43346363	Chr06	43346363	A	C	-5.72401	0.817049	1.5516e-11	MLM
		Chr06-43349910	Chr06	43349910	C	T	-4.77569	0.747756	6.24113e-10	MLM
		Chr06-43349984	Chr06	43349984	G	A	-5.0741	0.784331	3.86526e-10	MLM
		Chr06-43350723	Chr06	43350723	A	G	-5.0741	0.784331	3.86526e-10	MLM
		Chr06-43351413	Chr06	43351413	T	A	-5.0741	0.784331	3.86526e-10	MLM
		Chr06-43351671	Chr06	43351671	T	A	-5.18817	0.794875	2.75918e-10	MLM
		Chr06-43351672	Chr06	43351672	G	C	-5.18817	0.794875	2.75918e-10	MLM
		Chr06-43351876	Chr06	43351876	C	T	-5.0741	0.784331	3.86526e-10	MLM
		Chr06-43351883	Chr06	43351883	G	A	-5.02458	0.781423	4.85709e-10	MLM
		Chr06-43352232	Chr06	43352232	C	A	-5.0741	0.784331	3.86526e-10	MLM
		Chr06-43352342	Chr06	43352342	T	C	-5.0741	0.784331	3.86526e-10	MLM
		Chr06-43352455	Chr06	43352455	C	T	-4.81277	0.765687	1.11514e-09	MLM
		Chr06-43352487	Chr06	43352487	G	A	-5.0741	0.784331	3.86526e-10	MLM
		Chr06-43352750	Chr06	43352750	A	T	-5.0741	0.784331	3.86526e-10	MLM
		Chr06-43355398	Chr06	43355398	T	A	-5.15577	0.811116	7.43184e-10	MLM
		Chr06-43359512	Chr06	43359512	T	C	-5.15577	0.811116	7.43184e-10	MLM
		Chr06-43359732	Chr06	43359732	A	C	-5.15577	0.811116	7.43184e-10	MLM
		Chr06-43360545	Chr06	43360545	CT	C	-5.15577	0.811116	7.43184e-10	MLM
		Chr06-43360690	Chr06	43360690	A	G	-5.15577	0.811116	7.43184e-10	MLM
		Chr06-43361528	Chr06	43361528	AGC	A	-5.15577	0.811116	7.43184e-10	MLM
		Chr08-579562	Chr08	579562	T	G	-5.62477	0.929126	4.1084e-09	MLM
		Chr08-613861	Chr08	613861	AGAGTTCTTTGGAACTATGGTTTTTATGGAACTGGAAGAATAAGAACAGATTACTG	A	-4.98672	0.809695	2.28639e-09	MLM
		Chr08-614024	Chr08	614024	TTGGAATTCTTTGAAACTATGGTTTTTATGGAACTGGAAGAATAAGAATAGATTAC	T	-5.58957	0.851731	2.23893e-10	MLM
		Chr08-619193	Chr08	619193	C	G	-6.29235	0.938146	9.4964e-11	MLM
		Chr08-619598	Chr08	619598	T	C	-6.29235	0.938146	9.4964e-11	MLM
		Chr08-619718	Chr08	619718	C	T	-6.29235	0.938146	9.4964e-11	MLM
		Chr08-619887	Chr08	619887	C	T	-6.29235	0.938146	9.4964e-11	MLM
		Chr08-629417	Chr08	629417	T	TG	-5.30137	0.896809	8.9956e-09	MLM
		Chr08-630364	Chr08	630364	TTGTTCGTCTCA	T	-5.30137	0.896809	8.9956e-09	MLM
		Chr08-630891	Chr08	630891	C	A	-5.30137	0.896809	8.9956e-09	MLM
		Chr08-631831	Chr08	631831	T	C	-5.30137	0.896809	8.9956e-09	MLM
		Chr08-1819908	Chr08	1819908	A	G	-5.37232	0.889778	4.48977e-09	MLM
		Chr08-1820597	Chr08	1820597	A	T	-4.96651	0.832434	6.66225e-09	MLM
		Chr08-1825549	Chr08	1825549	A	G	-4.96651	0.832434	6.66225e-09	MLM
		Chr08-1825552	Chr08	1825552	C	T	-4.96651	0.832434	6.66225e-09	MLM
		Chr10-11407936	Chr10	11407936	G	A	-3.07576	0.504172	5.89996e-11	FarmCPU
	NDF	Chr01-24419224	Chr01	24419224	T	C	-26.7987	4.40601	3.2972e-09	MLM
		Chr01-67432697	Chr01	67432697	A	G	-8.66213	1.46792	9.00882e-09	MLM
		Chr02-8215290	Chr02	8215290	G	GGGAACACTTCATGAGA	-11.0891	1.76129	9.79714e-10	MLM+FarmCPU
		Chr02-9496268	Chr02	9496268	C	G	-11.0961	1.85296	5.56845e-09	MLM
		Chr02-53623849	Chr02	53623849	T	C	-8.45368	1.44389	8.99701e-11	FarmCPU
		Chr04-55640037	Chr04	55640037	C	A	-12.1215	1.98643	2.94969e-09	MLM
		Chr04-56527960	Chr04	56527960	G	A	-12.7672	2.15584	8.02063e-09	MLM
		Chr04-63969940	Chr04	63969940	T	C	-13.4424	2.23965	5.16055e-09	MLM
		Chr05-2240342	Chr05	2240342	A	AT	-15.5446	2.43623	6.00822e-10	MLM+FarmCPU
		Chr06-60028378	Chr06	60028378	G	GTGTTAGAATTAGGGTT	-11.9728	1.98749	4.56491e-09	MLM
		Chr08-5638659	Chr08	5638659	T	C	-12.733	2.15462	8.59096e-09	MLM
		Chr08-5638662	Chr08	5638662	G	A	-12.733	2.15462	8.59096e-09	MLM
		Chr08-5638678	Chr08	5638678	G	T	-12.733	2.15462	8.59096e-09	MLM
		Chr08-6050360	Chr08	6050360	A	AAT	-15.1255	2.34704	4.13998e-10	MLM
		Chr08-10794424	Chr08	10794424	T	A	12.541	1.98805	9.133e-10	MLM
		Chr08-11099847	Chr08	11099847	T	C	12.4267	1.96888	8.95809e-10	MLM
		Chr08-12090762	Chr08	12090762	G	C	-12.0508	1.91778	2.81446e-12	FarmCPU
		Chr08-15051223	Chr08	15051223	A	G	-13.8733	2.33979	7.71181e-09	MLM
		Chr08-16785331	Chr08	16785331	G	C	-16.672	2.2394	8.62331e-13	MLM
		Chr08-17082975	Chr08	17082975	C	G	-16.672	2.2394	8.62331e-13	MLM
		Chr08-17452222	Chr08	17452222	G	A	-16.672	2.2394	8.62331e-13	MLM
		Chr08-18043479	Chr08	18043479	G	A	-15.9079	2.36538	7.79961e-11	MLM
		Chr08-18159519	Chr08	18159519	A	T	-16.672	2.2394	8.62331e-13	MLM
		Chr08-18852074	Chr08	18852074	GA	G	-16.672	2.2394	8.62331e-13	MLM
		Chr08-18879832	Chr08	18879832	A	G	-16.672	2.2394	8.62331e-13	MLM
		Chr08-19432027	Chr08	19432027	A	T	-16.672	2.2394	8.62331e-13	MLM
		Chr08-19629859	Chr08	19629859	C	T	-16.672	2.2394	8.62331e-13	MLM
		Chr08-19898056	Chr08	19898056	C	T	-16.672	2.2394	8.62331e-13	MLM
		Chr08-20154190	Chr08	20154190	G	C	-16.672	2.2394	8.62331e-13	MLM
		Chr08-21008809	Chr08	21008809	C	T	-16.672	2.2394	8.62331e-13	MLM
		Chr08-21079936	Chr08	21079936	G	A	-16.672	2.2394	8.62331e-13	MLM
		Chr08-21441805	Chr08	21441805	A	G	-16.672	2.2394	8.62331e-13	MLM
		Chr08-21476089	Chr08	21476089	C	T	-16.672	2.2394	8.62331e-13	MLM
		Chr08-22832699	Chr08	22832699	T	G	-16.672	2.2394	8.62331e-13	MLM
		Chr08-22840638	Chr08	22840638	G	A	-16.672	2.2394	8.62331e-13	MLM
		Chr08-23410271	Chr08	23410271	T	C	-16.672	2.2394	8.62331e-13	MLM
		Chr08-23781342	Chr08	23781342	C	A	-16.672	2.2394	8.62331e-13	MLM
		Chr08-24956805	Chr08	24956805	G	A	-16.672	2.2394	8.62331e-13	MLM
		Chr08-25414387	Chr08	25414387	A	G	-16.672	2.2394	8.62331e-13	MLM
		Chr08-26027183	Chr08	26027183	T	A	-16.672	2.2394	8.62331e-13	MLM
		Chr08-26448829	Chr08	26448829	T	A	-16.672	2.2394	8.62331e-13	MLM
		Chr08-30561695	Chr08	30561695	C	T	-15.4794	2.28802	6.12062e-11	MLM
		Chr08-30864438	Chr08	30864438	G	A	-16.672	2.2394	8.62331e-13	MLM
		Chr08-31723582	Chr08	31723582	C	G	-16.672	2.2394	8.62331e-13	MLM
		Chr08-31808548	Chr08	31808548	A	T	-14.4818	2.29749	9.39289e-10	MLM
		Chr08-33108148	Chr08	33108148	T	C	-16.672	2.2394	8.62331e-13	MLM
		Chr08-33575820	Chr08	33575820	A	T	-16.672	2.2394	8.62331e-13	MLM
		Chr08-34072255	Chr08	34072255	G	A	-16.0534	2.25882	7.44152e-12	MLM
		Chr08-34279108	Chr08	34279108	T	C	-13.6805	2.30568	7.53938e-09	MLM
		Chr08-34438321	Chr08	34438321	T	C	-16.672	2.2394	8.62331e-13	MLM
		Chr08-36189341	Chr08	36189341	C	T	-16.672	2.2394	8.62331e-13	MLM
		Chr08-36833037	Chr08	36833037	G	A	-16.672	2.2394	8.62331e-13	MLM
		Chr08-38024357	Chr08	38024357	G	A	-16.672	2.2394	8.62331e-13	MLM
		Chr08-38151176	Chr08	38151176	C	G	-16.5723	2.23266	9.95731e-13	MLM
		Chr08-38484806	Chr08	38484806	G	C	-16.672	2.2394	8.62331e-13	MLM
		Chr08-39870814	Chr08	39870814	A	T	-16.672	2.2394	8.62331e-13	MLM
		Chr08-39884303	Chr08	39884303	C	A	-16.672	2.2394	8.62331e-13	MLM
		Chr08-40504684	Chr08	40504684	C	T	-16.672	2.2394	8.62331e-13	MLM
		Chr08-40563245	Chr08	40563245	C	T	-14.4818	2.29749	9.39289e-10	MLM
		Chr08-41724253	Chr08	41724253	A	G	-16.672	2.2394	8.62331e-13	MLM
		Chr08-42123013	Chr08	42123013	A	T	-16.672	2.2394	8.62331e-13	MLM
		Chr08-42364932	Chr08	42364932	G	A	-16.672	2.2394	8.62331e-13	MLM
		Chr08-42489918	Chr08	42489918	TACCAAATA	T	-16.672	2.2394	8.62331e-13	MLM
		Chr08-42489928	Chr08	42489928	C	G	-16.672	2.2394	8.62331e-13	MLM
		Chr08-42489932	Chr08	42489932	ACCT	A	-16.672	2.2394	8.62331e-13	MLM
		Chr08-42709782	Chr08	42709782	C	T	-16.672	2.2394	8.62331e-13	MLM
		Chr08-43694700	Chr08	43694700	C	T	-16.672	2.2394	8.62331e-13	MLM
		Chr08-43764196	Chr08	43764196	G	A	-16.672	2.2394	8.62331e-13	MLM
		Chr08-43918573	Chr08	43918573	G	C	-16.672	2.2394	8.62331e-13	MLM
		Chr08-44124387	Chr08	44124387	C	T	-16.672	2.2394	8.62331e-13	MLM
		Chr08-44335003	Chr08	44335003	C	T	-16.1098	2.28088	9.80191e-12	MLM
		Chr08-45027265	Chr08	45027265	G	A	-16.672	2.2394	8.62331e-13	MLM
		Chr08-45221686	Chr08	45221686	C	T	-15.9866	2.26374	9.86049e-12	MLM
		Chr08-48673465	Chr08	48673465	C	G	-13.3936	2.11543	7.98898e-10	MLM
		Chr08-49395916	Chr08	49395916	A	G	-14.3915	2.14486	8.56774e-11	MLM
		Chr09-56422688	Chr09	56422688	T	G	-11.9269	1.87802	7.14159e-10	MLM
		Chr09-56438916	Chr09	56438916	G	A	-11.9269	1.87802	7.14159e-10	MLM
		Chr09-57856187	Chr09	57856187	C	T	-13.6016	2.29937	8.32517e-09	MLM+FarmCPU
		Chr09-58569096	Chr09	58569096	C	A	-14.5526	2.14361	5.3088e-11	MLM
		Chr10-10656212	Chr10	10656212	C	T	-9.89303	1.61331	2.49147e-09	MLM
	NFC	Chr01-4106537	Chr01	4106537	A	G	3.82238	0.754593	1.94e-09	FarmCPU
		Chr03-12740909	Chr03	12740909	T	TA	-2.1991	0.441948	7.58e-09	FarmCPU
		Chr03-17080709	Chr03	17080709	T	C	6.46061	1.04552	2.04e-09	MLM
		Chr03-18556009	Chr03	18556009	T	C	6.73776	1.12748	6.32e-09	MLM
		Chr03-20130207	Chr03	20130207	A	G	7.2749	1.14898	8.57e-10	MLM
		Chr05-4033795	Chr05	4033795	G	T	2.71281	0.515978	3.42e-09	FarmCPU
		Chr05-35131508	Chr05	35131508	C	T	13.0734	2.19085	6.62e-09	MLM
		Chr05-60950245	Chr05	60950245	A	G	-6.6559	1.30795	5.42e-09	FarmCPU
		Chr06-43344671	Chr06	43344671	TGTAAAGCTACTAA	T	6.7399	1.13813	8.49e-09	MLM
		Chr06-43346363	Chr06	43346363	A	C	6.7399	1.13813	8.49e-09	MLM
		Chr06-48838810	Chr06	48838810	T	TCTACGTTACACGGATACTTCAGAA	9.21374	1.37472	9.78e-11	MLM
		Chr06-50242536	Chr06	50242536	A	G	-1.51222	0.284656	7.46e-10	FarmCPU
		Chr08-5067262	Chr08	5067262	A	G	5.02564	0.7024	2.2e-14	FarmCPU
		Chr08-5586548	Chr08	5586548	C	T	8.35125	1.31836	8.42e-10	MLM
		Chr08-5591632	Chr08	5591632	C	T	8.35125	1.31836	8.42e-10	MLM
		Chr08-5591993	Chr08	5591993	T	A	8.35125	1.31836	8.42e-10	MLM
		Chr08-5592168	Chr08	5592168	C	CA	8.35125	1.31836	8.42e-10	MLM
		Chr08-5592214	Chr08	5592214	TCTCTCTCTCCCCTCTCTCCCTAGTGCCACCGCCGCC	T	8.35125	1.31836	8.42e-10	MLM
		Chr08-5592659	Chr08	5592659	T	G	7.67655	1.2139	8.96e-10	MLM
		Chr08-5592880	Chr08	5592880	G	GCGGC	7.67655	1.2139	8.96e-10	MLM
		Chr08-5593314	Chr08	5593314	A	T	8.35125	1.31836	8.42e-10	MLM
		Chr08-5593316	Chr08	5593316	T	G	8.35125	1.31836	8.42e-10	MLM
		Chr08-5593429	Chr08	5593429	A	T	8.35125	1.31836	8.42e-10	MLM
		Chr08-5593531	Chr08	5593531	A	ACACTAG	8.35125	1.31836	8.42e-10	MLM
		Chr08-5593802	Chr08	5593802	A	AAATTGCTATTAGGGCATCCTTTCTGGGTAGCTAAGTGGATGTCACACATCGATCGTCATGATTT	8.35125	1.31836	8.42e-10	MLM
		Chr08-5593803	Chr08	5593803	A	AATT	8.35125	1.31836	8.42e-10	MLM
		Chr08-5599965	Chr08	5599965	C	T	8.35125	1.31836	8.42e-10	MLM
		Chr08-5600265	Chr08	5600265	A	G	8.35125	1.31836	8.42e-10	MLM
		Chr08-5600276	Chr08	5600276	A	C	8.35125	1.31836	8.42e-10	MLM
		Chr08-5600340	Chr08	5600340	A	T	8.35125	1.31836	8.42e-10	MLM
		Chr08-5600391	Chr08	5600391	G	C	8.35125	1.31836	8.42e-10	MLM
		Chr08-5600434	Chr08	5600434	T	C	8.35125	1.31836	8.42e-10	MLM
		Chr08-5600460	Chr08	5600460	A	G	8.35125	1.31836	8.42e-10	MLM
		Chr08-5600468	Chr08	5600468	G	A	8.35125	1.31836	8.42e-10	MLM
		Chr08-5600484	Chr08	5600484	T	G	8.35125	1.31836	8.42e-10	MLM
		Chr08-5600489	Chr08	5600489	A	C	8.35125	1.31836	8.42e-10	MLM
		Chr08-5600520	Chr08	5600520	G	A	8.35125	1.31836	8.42e-10	MLM
		Chr08-5600571	Chr08	5600571	T	A	8.35125	1.31836	8.42e-10	MLM
		Chr08-5600573	Chr08	5600573	C	CTTAAAA	8.35125	1.31836	8.42e-10	MLM
		Chr08-5600575	Chr08	5600575	TG	T	8.35125	1.31836	8.42e-10	MLM
		Chr08-5600577	Chr08	5600577	TG	T	8.35125	1.31836	8.42e-10	MLM
		Chr08-5600580	Chr08	5600580	T	TAGC	8.35125	1.31836	8.42e-10	MLM
		Chr08-5600583	Chr08	5600583	T	TTC	8.35125	1.31836	8.42e-10	MLM
		Chr08-5600602	Chr08	5600602	A	T	8.35125	1.31836	8.42e-10	MLM
		Chr08-5600610	Chr08	5600610	G	A	8.35125	1.31836	8.42e-10	MLM
		Chr08-5600631	Chr08	5600631	A	C	8.35125	1.31836	8.42e-10	MLM
		Chr08-5600647	Chr08	5600647	C	G	8.35125	1.31836	8.42e-10	MLM
		Chr08-5600654	Chr08	5600654	A	G	8.35125	1.31836	8.42e-10	MLM
		Chr08-5600656	Chr08	5600656	GC	G	8.35125	1.31836	8.42e-10	MLM
		Chr08-5600660	Chr08	5600660	TTTTA	T	8.35125	1.31836	8.42e-10	MLM
		Chr08-5600678	Chr08	5600678	G	C	8.35125	1.31836	8.42e-10	MLM
		Chr08-5600713	Chr08	5600713	C	CAT	8.35125	1.31836	8.42e-10	MLM
		Chr08-5600756	Chr08	5600756	G	A	8.35125	1.31836	8.42e-10	MLM
		Chr08-5600765	Chr08	5600765	T	A	8.35125	1.31836	8.42e-10	MLM
		Chr08-5600767	Chr08	5600767	A	AAAGC	8.35125	1.31836	8.42e-10	MLM
		Chr08-5600768	Chr08	5600768	T	TG	8.35125	1.31836	8.42e-10	MLM
		Chr08-5600790	Chr08	5600790	T	C	8.35125	1.31836	8.42e-10	MLM
		Chr08-5600792	Chr08	5600792	T	C	8.35125	1.31836	8.42e-10	MLM
		Chr08-5600799	Chr08	5600799	A	AT	8.35125	1.31836	8.42e-10	MLM
		Chr08-5600830	Chr08	5600830	G	T	8.35125	1.31836	8.42e-10	MLM
		Chr08-5600860	Chr08	5600860	G	GGA	8.35125	1.31836	8.42e-10	MLM
		Chr08-5600878	Chr08	5600878	G	A	8.35125	1.31836	8.42e-10	MLM
		Chr08-5600906	Chr08	5600906	G	A	8.35125	1.31836	8.42e-10	MLM
		Chr08-5600923	Chr08	5600923	C	T	8.35125	1.31836	8.42e-10	MLM
		Chr08-5600951	Chr08	5600951	C	T	8.35125	1.31836	8.42e-10	MLM
		Chr08-5600971	Chr08	5600971	A	G	8.35125	1.31836	8.42e-10	MLM
		Chr08-5600974	Chr08	5600974	A	G	8.35125	1.31836	8.42e-10	MLM
		Chr08-5600996	Chr08	5600996	T	C	8.35125	1.31836	8.42e-10	MLM
		Chr08-5601008	Chr08	5601008	T	A	8.35125	1.31836	8.42e-10	MLM
		Chr08-5601009	Chr08	5601009	ACT	A	8.35125	1.31836	8.42e-10	MLM
		Chr08-5601013	Chr08	5601013	C	A	8.35125	1.31836	8.42e-10	MLM
		Chr08-5601014	Chr08	5601014	A	AAAC	8.35125	1.31836	8.42e-10	MLM
		Chr08-5601021	Chr08	5601021	T	TAGG	8.35125	1.31836	8.42e-10	MLM
		Chr08-5601046	Chr08	5601046	A	T	7.91903	1.32335	6.04e-09	MLM
		Chr08-5601293	Chr08	5601293	C	T	8.35125	1.31836	8.42e-10	MLM
		Chr08-5601490	Chr08	5601490	A	G	8.35125	1.31836	8.42e-10	MLM
		Chr08-5602877	Chr08	5602877	A	G	7.49562	1.25438	6.33e-09	MLM
		Chr08-5603293	Chr08	5603293	A	T	7.60048	1.28625	9.11e-09	MLM
		Chr08-5603298	Chr08	5603298	C	T	7.60048	1.28625	9.11e-09	MLM
		Chr08-5603378	Chr08	5603378	T	G	7.60048	1.28625	9.11e-09	MLM
		Chr08-5605064	Chr08	5605064	G	T	8.35125	1.31836	8.42e-10	MLM
		Chr08-5605913	Chr08	5605913	GT	G	6.65723	1.12397	8.45e-09	MLM
		Chr08-5641088	Chr08	5641088	T	C	8.35125	1.31836	8.42e-10	MLM
		Chr08-5649356	Chr08	5649356	A	C	8.35125	1.31836	8.42e-10	MLM
		Chr08-5650247	Chr08	5650247	T	TGACCAATCACCAAGATA	8.56799	1.35823	9.8e-10	MLM
		Chr08-5651626	Chr08	5651626	G	A	8.35125	1.31836	8.42e-10	MLM
		Chr08-6050360	Chr08	6050360	A	AAT	9.58801	1.40535	4.75e-11	MLM
		Chr09-567793	Chr09	567793	G	C	4.21681	0.62673	1.97e-13	FarmCPU
	Lignin	Chr08-62269623	Chr08	62269623	A	T	-0.660339	0.110972	1.43636e-10	FarmCPU
	SC, seed color, PH, plant height, DTH, days to harvest, FW, fresh weight, DW, dry weight, BRX, Brix %, ADF, acid detergent fiber, NDF, neutral detergent fiber, NFC, non-fibrous carbohydrate. SE, standard error.

## Sheet: Ts-Tv_BAP_Table S5
S. No.	Type of Transition/Transversion	Number of SNPs
1	A>C	593267
2	A>G	2050178
3	A>T	915961
4	C>A	1036653
5	C>G	811560
6	C>T	4452869
7	G>A	4461332
8	G>C	815717
9	G>T	1043412
10	T>A	920404
11	T>C	2050928
12	T>G	592445
	TOTAL-SNPs	19744726

## Sheet: Table S6
S. No.	X.1	CHR-SNP	CHROMOSOME	POSITION	X	log10BayesFactor	Marker	No. of markers
276518	276518	Chr01-32299256	1	32299256	276518	13.2767	276518	1
276561	276561	Chr01-32300681	1	32300681	276561	12.7589	276561	2
276591	276591	Chr01-32301449	1	32301449	276591	12.7589	276591	3
276594	276594	Chr01-32301466	1	32301466	276594	12.7589	276594	4
276781	276781	Chr01-32307906	1	32307906	276781	12.7589	276781	5
276786	276786	Chr01-32308035	1	32308035	276786	12.7589	276786	6
526907	526907	Chr01-65630690	1	65630690	526907	12.5425	526907	7
276559	276559	Chr01-32300627	1	32300627	276559	12.0518	276559	8
276621	276621	Chr01-32302128	1	32302128	276621	12.0518	276621	9
276641	276641	Chr01-32303171	1	32303171	276641	12.0518	276641	10
276775	276775	Chr01-32307694	1	32307694	276775	12.0518	276775	11
276776	276776	Chr01-32307697	1	32307697	276776	12.0518	276776	12
276664	276664	Chr01-32303678	1	32303678	276664	11.9746	276664	13
276593	276593	Chr01-32301462	1	32301462	276593	11.6348	276593	14
526909	526909	Chr01-65630747	1	65630747	526909	11.5543	526909	15
421266	421266	Chr01-56058205	1	56058205	421266	11.1823	421266	16
402527	402527	Chr01-54291325	1	54291325	402527	10.7966	402527	17
243610	243610	Chr01-28742846	1	28742846	243610	10.1763	243610	18
555733	555733	Chr01-68885725	1	68885725	555733	9.80679	555733	19
555734	555734	Chr01-68885734	1	68885734	555734	9.80679	555734	20
555735	555735	Chr01-68885765	1	68885765	555735	9.80679	555735	21
555710	555710	Chr01-68884328	1	68884328	555710	9.64035	555710	22
555711	555711	Chr01-68884335	1	68884335	555711	9.64035	555711	23
555712	555712	Chr01-68884352	1	68884352	555712	9.64035	555712	24
555713	555713	Chr01-68884538	1	68884538	555713	9.64035	555713	25
555714	555714	Chr01-68884539	1	68884539	555714	9.64035	555714	26
555729	555729	Chr01-68885484	1	68885484	555729	9.64035	555729	27
555730	555730	Chr01-68885549	1	68885549	555730	9.64035	555730	28
555732	555732	Chr01-68885691	1	68885691	555732	9.64035	555732	29
555736	555736	Chr01-68885894	1	68885894	555736	9.64035	555736	30
555738	555738	Chr01-68886072	1	68886072	555738	9.64035	555738	31
555739	555739	Chr01-68886076	1	68886076	555739	9.64035	555739	32
555740	555740	Chr01-68886109	1	68886109	555740	9.64035	555740	33
276682	276682	Chr01-32304090	1	32304090	276682	9.50999	276682	34
553188	553188	Chr01-68592300	1	68592300	553188	9.47783	553188	35
597881	597881	Chr01-74327045	1	74327045	597881	9.33418	597881	36
423302	423302	Chr01-56360672	1	56360672	423302	9.31354	423302	37
422769	422769	Chr01-56251699	1	56251699	422769	9.15633	422769	38
553173	553173	Chr01-68578375	1	68578375	553173	9.032	553173	39
62449	62449	Chr01-8016164	1	8016164	62449	8.98373	62449	40
555719	555719	Chr01-68884788	1	68884788	555719	8.9264	555719	41
555722	555722	Chr01-68884838	1	68884838	555722	8.9264	555722	42
555723	555723	Chr01-68884912	1	68884912	555723	8.9264	555723	43
555728	555728	Chr01-68885415	1	68885415	555728	8.9264	555728	44
555703	555703	Chr01-68884064	1	68884064	555703	8.80688	555703	45
555704	555704	Chr01-68884142	1	68884142	555704	8.80688	555704	46
555705	555705	Chr01-68884151	1	68884151	555705	8.80688	555705	47
555706	555706	Chr01-68884233	1	68884233	555706	8.80688	555706	48
555707	555707	Chr01-68884257	1	68884257	555707	8.80688	555707	49
555708	555708	Chr01-68884268	1	68884268	555708	8.80688	555708	50
555709	555709	Chr01-68884298	1	68884298	555709	8.80688	555709	51
555715	555715	Chr01-68884558	1	68884558	555715	8.80688	555715	52
555718	555718	Chr01-68884716	1	68884716	555718	8.80688	555718	53
555724	555724	Chr01-68884955	1	68884955	555724	8.80688	555724	54
555725	555725	Chr01-68885085	1	68885085	555725	8.80688	555725	55
555726	555726	Chr01-68885141	1	68885141	555726	8.80688	555726	56
555727	555727	Chr01-68885232	1	68885232	555727	8.80688	555727	57
555742	555742	Chr01-68886583	1	68886583	555742	8.80688	555742	58
138571	138571	Chr01-16651028	1	16651028	138571	8.58802	138571	59
341734	341734	Chr01-48143629	1	48143629	341734	8.48291	341734	60
273050	273050	Chr01-31830311	1	31830311	273050	8.3542	273050	61
276690	276690	Chr01-32304526	1	32304526	276690	8.35128	276690	62
555720	555720	Chr01-68884806	1	68884806	555720	8.21323	555720	63
422419	422419	Chr01-56201728	1	56201728	422419	8.12184	422419	64
422795	422795	Chr01-56257878	1	56257878	422795	8.12184	422795	65
422855	422855	Chr01-56264634	1	56264634	422855	8.12184	422855	66
423783	423783	Chr01-56426890	1	56426890	423783	8.12184	423783	67
336350	336350	Chr01-47596005	1	47596005	336350	8.07084	336350	68
526906	526906	Chr01-65630676	1	65630676	526906	8.02525	526906	69
336315	336315	Chr01-47590744	1	47590744	336315	7.96665	336315	70
337294	337294	Chr01-47738829	1	47738829	337294	7.91493	337294	71
592295	592295	Chr01-73767327	1	73767327	592295	7.87284	592295	72
155592	155592	Chr01-18232330	1	18232330	155592	7.8555	155592	73
299113	299113	Chr01-36227351	1	36227351	299113	7.75791	299113	74
20362	20362	Chr01-2723780	1	2723780	20362	7.7439	20362	75
17619	17619	Chr01-2257215	1	2257215	17619	7.58896	17619	76
345686	345686	Chr01-48608225	1	48608225	345686	7.47223	345686	77
62590	62590	Chr01-8021410	1	8021410	62590	7.39996	62590	78
62591	62591	Chr01-8021412	1	8021412	62591	7.39996	62591	79
17623	17623	Chr01-2257340	1	2257340	17623	7.27322	17623	80
118832	118832	Chr01-14449634	1	14449634	118832	7.25486	118832	81
462198	462198	Chr01-59719041	1	59719041	462198	7.18157	462198	82
276624	276624	Chr01-32302206	1	32302206	276624	7.11681	276624	83
202713	202713	Chr01-24237273	1	24237273	202713	7.10194	202713	84
432680	432680	Chr01-57279837	1	57279837	432680	7.07285	432680	85
579118	579118	Chr01-72388076	1	72388076	579118	7.06313	579118	86
579119	579119	Chr01-72388080	1	72388080	579119	7.06313	579119	87
579120	579120	Chr01-72388085	1	72388085	579120	7.06313	579120	88
117174	117174	Chr01-14283953	1	14283953	117174	7.0413	117174	89
618165	618165	Chr01-76743897	1	76743897	618165	7.02869	618165	90
542998	542998	Chr01-67433181	1	67433181	542998	6.96795	542998	91
543004	543004	Chr01-67435017	1	67435017	543004	6.96795	543004	92
118870	118870	Chr01-14450304	1	14450304	118870	6.94853	118870	93
89023	89023	Chr01-11077122	1	11077122	89023	6.89075	89023	94
343387	343387	Chr01-48348514	1	48348514	343387	6.88863	343387	95
117176	117176	Chr01-14284044	1	14284044	117176	6.85928	117176	96
118831	118831	Chr01-14449626	1	14449626	118831	6.84081	118831	97
118834	118834	Chr01-14449657	1	14449657	118834	6.84081	118834	98
118835	118835	Chr01-14449661	1	14449661	118835	6.84081	118835	99
553956	553956	Chr01-68729717	1	68729717	553956	6.77817	553956	100
337366	337366	Chr01-47753673	1	47753673	337366	6.76837	337366	101
67662	67662	Chr01-8705652	1	8705652	67662	6.75659	67662	102
330667	330667	Chr01-46807862	1	46807862	330667	6.72949	330667	103
17620	17620	Chr01-2257253	1	2257253	17620	6.72377	17620	104
618035	618035	Chr01-76726863	1	76726863	618035	6.7092	618035	105
618036	618036	Chr01-76726866	1	76726866	618036	6.7092	618036	106
618038	618038	Chr01-76726936	1	76726936	618038	6.7092	618038	107
618037	618037	Chr01-76726926	1	76726926	618037	6.67648	618037	108
540011	540011	Chr01-67150840	1	67150840	540011	6.65217	540011	109
331107	331107	Chr01-46881848	1	46881848	331107	6.59056	331107	110
173684	173684	Chr01-20140805	1	20140805	173684	6.56419	173684	111
232240	232240	Chr01-27612402	1	27612402	232240	6.56109	232240	112
357585	357585	Chr01-49640459	1	49640459	357585	6.49008	357585	113
357586	357586	Chr01-49640463	1	49640463	357586	6.49008	357586	114
357588	357588	Chr01-49640477	1	49640477	357588	6.49008	357588	115
443242	443242	Chr01-58194563	1	58194563	443242	6.46542	443242	116
330668	330668	Chr01-46807890	1	46807890	330668	6.43885	330668	117
543026	543026	Chr01-67438144	1	67438144	543026	6.4286	543026	118
543027	543027	Chr01-67438146	1	67438146	543027	6.4286	543027	119
276661	276661	Chr01-32303613	1	32303613	276661	6.39844	276661	120
160070	160070	Chr01-18717815	1	18717815	160070	6.39485	160070	121
160071	160071	Chr01-18717832	1	18717832	160071	6.39485	160071	122
640730	640730	Chr01-79376640	1	79376640	640730	6.38735	640730	123
31571	31571	Chr01-3990135	1	3990135	31571	6.36637	31571	124
260441	260441	Chr01-30348095	1	30348095	260441	6.35468	260441	125
67661	67661	Chr01-8705634	1	8705634	67661	6.33411	67661	126
618025	618025	Chr01-76724498	1	76724498	618025	6.32484	618025	127
618104	618104	Chr01-76731875	1	76731875	618104	6.32484	618104	128
618121	618121	Chr01-76733943	1	76733943	618121	6.32484	618121	129
618132	618132	Chr01-76739239	1	76739239	618132	6.32484	618132	130
618135	618135	Chr01-76739801	1	76739801	618135	6.32484	618135	131
618139	618139	Chr01-76740461	1	76740461	618139	6.32484	618139	132
618151	618151	Chr01-76742570	1	76742570	618151	6.32484	618151	133
344395	344395	Chr01-48498544	1	48498544	344395	6.30793	344395	134
335635	335635	Chr01-47485578	1	47485578	335635	6.29704	335635	135
234595	234595	Chr01-27845335	1	27845335	234595	6.27334	234595	136
496380	496380	Chr01-62719134	1	62719134	496380	6.26911	496380	137
62503	62503	Chr01-8018732	1	8018732	62503	6.26647	62503	138
116109	116109	Chr01-14170356	1	14170356	116109	6.26075	116109	139
116163	116163	Chr01-14178877	1	14178877	116163	6.26075	116163	140
425252	425252	Chr01-56579213	1	56579213	425252	6.2567	425252	141
637897	637897	Chr01-79018437	1	79018437	637897	6.22241	637897	142
637899	637899	Chr01-79019140	1	79019140	637899	6.22241	637899	143
637903	637903	Chr01-79020587	1	79020587	637903	6.22241	637903	144
25465	25465	Chr01-3299339	1	3299339	25465	6.20101	25465	145
342909	342909	Chr01-48267701	1	48267701	342909	6.19611	342909	146
337416	337416	Chr01-47770048	1	47770048	337416	6.17534	337416	147
17632	17632	Chr01-2257785	1	2257785	17632	6.1751	17632	148
17651	17651	Chr01-2258324	1	2258324	17651	6.1751	17651	149
17658	17658	Chr01-2258436	1	2258436	17658	6.1751	17658	150
17684	17684	Chr01-2260336	1	2260336	17684	6.1751	17684	151
17691	17691	Chr01-2260559	1	2260559	17691	6.1751	17691	152
17694	17694	Chr01-2260687	1	2260687	17694	6.1751	17694	153
17695	17695	Chr01-2260688	1	2260688	17695	6.1751	17695	154
17698	17698	Chr01-2260832	1	2260832	17698	6.1751	17698	155
160072	160072	Chr01-18717848	1	18717848	160072	6.17331	160072	156
618169	618169	Chr01-76744220	1	76744220	618169	6.17264	618169	157
89024	89024	Chr01-11077128	1	11077128	89024	6.16609	89024	158
116377	116377	Chr01-14219534	1	14219534	116377	6.15004	116377	159
542997	542997	Chr01-67432697	1	67432697	542997	6.14851	542997	160
328951	328951	Chr01-46316912	1	46316912	328951	6.124	328951	161
442730	442730	Chr01-58167509	1	58167509	442730	6.12233	442730	162
23055	23055	Chr01-3044943	1	3044943	23055	6.12114	23055	163
23525	23525	Chr01-3125631	1	3125631	23525	6.12114	23525	164
441580	441580	Chr01-57972661	1	57972661	441580	6.10775	441580	165
441581	441581	Chr01-57972662	1	57972662	441581	6.10775	441581	166
441582	441582	Chr01-57972700	1	57972700	441582	6.10775	441582	167
618173	618173	Chr01-76744749	1	76744749	618173	6.1074	618173	168
348489	348489	Chr01-48861210	1	48861210	348489	6.10431	348489	169
276555	276555	Chr01-32300485	1	32300485	276555	6.0966	276555	170
640725	640725	Chr01-79376503	1	79376503	640725	6.08504	640725	171
640731	640731	Chr01-79376663	1	79376663	640731	6.08504	640731	172
640732	640732	Chr01-79376699	1	79376699	640732	6.08504	640732	173
640733	640733	Chr01-79376729	1	79376729	640733	6.08504	640733	174
281723	281723	Chr01-33512672	1	33512672	281723	6.07319	281723	175
273047	273047	Chr01-31830049	1	31830049	273047	6.04763	273047	176
62462	62462	Chr01-8016948	1	8016948	62462	6.04124	62462	177
62463	62463	Chr01-8017073	1	8017073	62463	6.04124	62463	178
62466	62466	Chr01-8017240	1	8017240	62466	6.04124	62466	179
62506	62506	Chr01-8018796	1	8018796	62506	6.04124	62506	180
62512	62512	Chr01-8019002	1	8019002	62512	6.04124	62512	181
62532	62532	Chr01-8019242	1	8019242	62532	6.04124	62532	182
62546	62546	Chr01-8019347	1	8019347	62546	6.04124	62546	183
62547	62547	Chr01-8019355	1	8019355	62547	6.04124	62547	184
62549	62549	Chr01-8019362	1	8019362	62549	6.04124	62549	185
62551	62551	Chr01-8019387	1	8019387	62551	6.04124	62551	186
62553	62553	Chr01-8019461	1	8019461	62553	6.04124	62553	187
62554	62554	Chr01-8019477	1	8019477	62554	6.04124	62554	188
62562	62562	Chr01-8020316	1	8020316	62562	6.04124	62562	189
62567	62567	Chr01-8020629	1	8020629	62567	6.04124	62567	190
62604	62604	Chr01-8022292	1	8022292	62604	6.04124	62604	191
62621	62621	Chr01-8024786	1	8024786	62621	6.04124	62621	192
62628	62628	Chr01-8027881	1	8027881	62628	6.04124	62628	193
62670	62670	Chr01-8029954	1	8029954	62670	6.04124	62670	194
62716	62716	Chr01-8031712	1	8031712	62716	6.04124	62716	195
63455	63455	Chr01-8106580	1	8106580	63455	6.04124	63455	196
554850	554850	Chr01-68791928	1	68791928	554850	6.03321	554850	197
229763	229763	Chr01-27333119	1	27333119	229763	6.01474	229763	198
31898	31898	Chr01-4026285	1	4026285	31898	6.00516	31898	199
640727	640727	Chr01-79376605	1	79376605	640727	5.99419	640727	200
640728	640728	Chr01-79376606	1	79376606	640728	5.99419	640728	201
640735	640735	Chr01-79376786	1	79376786	640735	5.99419	640735	202
276583	276583	Chr01-32301184	1	32301184	276583	5.97165	276583	203
62632	62632	Chr01-8027927	1	8027927	62632	5.96025	62632	204
471152	471152	Chr01-60661479	1	60661479	471152	5.94928	471152	205
335141	335141	Chr01-47440196	1	47440196	335141	5.94202	335141	206
555242	555242	Chr01-68834339	1	68834339	555242	5.92827	555242	207
17648	17648	Chr01-2258239	1	2258239	17648	5.91782	17648	208
25290	25290	Chr01-3288160	1	3288160	25290	5.91495	25290	209
232674	232674	Chr01-27676399	1	27676399	232674	5.89428	232674	210
618207	618207	Chr01-76754186	1	76754186	618207	5.87276	618207	211
618184	618184	Chr01-76746104	1	76746104	618184	5.87127	618184	212
618185	618185	Chr01-76746109	1	76746109	618185	5.87127	618185	213
116869	116869	Chr01-14267596	1	14267596	116869	5.87073	116869	214
116873	116873	Chr01-14267824	1	14267824	116873	5.87073	116873	215
117001	117001	Chr01-14274982	1	14274982	117001	5.87073	117001	216
63275	63275	Chr01-8081805	1	8081805	63275	5.86569	63275	217
345685	345685	Chr01-48608148	1	48608148	345685	5.86334	345685	218
341724	341724	Chr01-48142570	1	48142570	341724	5.8503	341724	219
341725	341725	Chr01-48142592	1	48142592	341725	5.8503	341725	220
227652	227652	Chr01-27048169	1	27048169	227652	5.85012	227652	221
64265	64265	Chr01-8170410	1	8170410	64265	5.84971	64265	222
64266	64266	Chr01-8170411	1	8170411	64266	5.84971	64266	223
598250	598250	Chr01-74396944	1	74396944	598250	5.84799	598250	224
344403	344403	Chr01-48499045	1	48499045	344403	5.84474	344403	225
62833	62833	Chr01-8035580	1	8035580	62833	5.83888	62833	226
62834	62834	Chr01-8035582	1	8035582	62834	5.83888	62834	227
180159	180159	Chr01-21021173	1	21021173	180159	5.83566	180159	228
62489	62489	Chr01-8018331	1	8018331	62489	5.79648	62489	229
337447	337447	Chr01-47772262	1	47772262	337447	5.79146	337447	230
59124	59124	Chr01-7647186	1	7647186	59124	5.78873	59124	231
348249	348249	Chr01-48844844	1	48844844	348249	5.77175	348249	232
337451	337451	Chr01-47773271	1	47773271	337451	5.76061	337451	233
328039	328039	Chr01-46089461	1	46089461	328039	5.75558	328039	234
17670	17670	Chr01-2259052	1	2259052	17670	5.72713	17670	235
17672	17672	Chr01-2259109	1	2259109	17672	5.72713	17672	236
17673	17673	Chr01-2259110	1	2259110	17673	5.72713	17673	237
17676	17676	Chr01-2259477	1	2259477	17676	5.72713	17676	238
17682	17682	Chr01-2260286	1	2260286	17682	5.72713	17682	239
17683	17683	Chr01-2260316	1	2260316	17683	5.72713	17683	240
17685	17685	Chr01-2260356	1	2260356	17685	5.72713	17685	241
17688	17688	Chr01-2260426	1	2260426	17688	5.72713	17688	242
17689	17689	Chr01-2260433	1	2260433	17689	5.72713	17689	243
17690	17690	Chr01-2260455	1	2260455	17690	5.72713	17690	244
640726	640726	Chr01-79376571	1	79376571	640726	5.70378	640726	245
640729	640729	Chr01-79376622	1	79376622	640729	5.70378	640729	246
640734	640734	Chr01-79376774	1	79376774	640734	5.70378	640734	247
89022	89022	Chr01-11077107	1	11077107	89022	5.69831	89022	248
274411	274411	Chr01-31961040	1	31961040	274411	5.69075	274411	249
339266	339266	Chr01-47896261	1	47896261	339266	5.69016	339266	250
62197	62197	Chr01-7985935	1	7985935	62197	5.68431	62197	251
63180	63180	Chr01-8073239	1	8073239	63180	5.6815	63180	252
24080	24080	Chr01-3179732	1	3179732	24080	5.66819	24080	253
341727	341727	Chr01-48142688	1	48142688	341727	5.66817	341727	254
118838	118838	Chr01-14449673	1	14449673	118838	5.66754	118838	255
118839	118839	Chr01-14449679	1	14449679	118839	5.66754	118839	256
118840	118840	Chr01-14449681	1	14449681	118840	5.66754	118840	257
118841	118841	Chr01-14449687	1	14449687	118841	5.66754	118841	258
550614	550614	Chr01-68320016	1	68320016	550614	5.65616	550614	259
62231	62231	Chr01-7991652	1	7991652	62231	5.63012	62231	260
63242	63242	Chr01-8077879	1	8077879	63242	5.61843	63242	261
496374	496374	Chr01-62719033	1	62719033	496374	5.60246	496374	262
554594	554594	Chr01-68780785	1	68780785	554594	5.60143	554594	263
554697	554697	Chr01-68784991	1	68784991	554697	5.60143	554697	264
554859	554859	Chr01-68794614	1	68794614	554859	5.60143	554859	265
276726	276726	Chr01-32305807	1	32305807	276726	5.60034	276726	266
384463	384463	Chr01-52544875	1	52544875	384463	5.59832	384463	267
432621	432621	Chr01-57275612	1	57275612	432621	5.58888	432621	268
432623	432623	Chr01-57275645	1	57275645	432623	5.58888	432623	269
432639	432639	Chr01-57278115	1	57278115	432639	5.58888	432639	270
432641	432641	Chr01-57278200	1	57278200	432641	5.58888	432641	271
432644	432644	Chr01-57278318	1	57278318	432644	5.58888	432644	272
432674	432674	Chr01-57279630	1	57279630	432674	5.58888	432674	273
286390	286390	Chr01-34153318	1	34153318	286390	5.58319	286390	274
384434	384434	Chr01-52543639	1	52543639	384434	5.58099	384434	275
34123	34123	Chr01-4272618	1	4272618	34123	5.54132	34123	276
94407	94407	Chr01-11639614	1	11639614	94407	5.51425	94407	277
94418	94418	Chr01-11640851	1	11640851	94418	5.51425	94418	278
94429	94429	Chr01-11641314	1	11641314	94429	5.51425	94429	279
483399	483399	Chr01-61670096	1	61670096	483399	5.50116	483399	280
366322	366322	Chr01-50458876	1	50458876	366322	5.50074	366322	281
366323	366323	Chr01-50458879	1	50458879	366323	5.50074	366323	282
618156	618156	Chr01-76743164	1	76743164	618156	5.48657	618156	283
618157	618157	Chr01-76743187	1	76743187	618157	5.48657	618157	284
618159	618159	Chr01-76743386	1	76743386	618159	5.48657	618159	285
618160	618160	Chr01-76743427	1	76743427	618160	5.48657	618160	286
618161	618161	Chr01-76743471	1	76743471	618161	5.48657	618161	287
336201	336201	Chr01-47560097	1	47560097	336201	5.4837	336201	288
618170	618170	Chr01-76744341	1	76744341	618170	5.47852	618170	289
618174	618174	Chr01-76745319	1	76745319	618174	5.47852	618174	290
618176	618176	Chr01-76745451	1	76745451	618176	5.47852	618176	291
618177	618177	Chr01-76745465	1	76745465	618177	5.47852	618177	292
618182	618182	Chr01-76745653	1	76745653	618182	5.47852	618182	293
328838	328838	Chr01-46207620	1	46207620	328838	5.47374	328838	294
325426	325426	Chr01-45839033	1	45839033	325426	5.47267	325426	295
568624	568624	Chr01-71210409	1	71210409	568624	5.46966	568624	296
572754	572754	Chr01-71693461	1	71693461	572754	5.45661	572754	297
542963	542963	Chr01-67426207	1	67426207	542963	5.44881	542963	298
286998	286998	Chr01-34213710	1	34213710	286998	5.42712	286998	299
117189	117189	Chr01-14284524	1	14284524	117189	5.42583	117189	300
291429	291429	Chr01-34810928	1	34810928	291429	5.41808	291429	301
650084	650084	Chr01-80255054	1	80255054	650084	5.41722	650084	302
227650	227650	Chr01-27048130	1	27048130	227650	5.4161	227650	303
227651	227651	Chr01-27048132	1	27048132	227651	5.4161	227651	304
16984	16984	Chr01-2115400	1	2115400	16984	5.4002	16984	305
16985	16985	Chr01-2115417	1	2115417	16985	5.4002	16985	306
598627	598627	Chr01-74450716	1	74450716	598627	5.39305	598627	307
598628	598628	Chr01-74450718	1	74450718	598628	5.39305	598628	308
598629	598629	Chr01-74450719	1	74450719	598629	5.39305	598629	309
117147	117147	Chr01-14280656	1	14280656	117147	5.38333	117147	310
270695	270695	Chr01-31331438	1	31331438	270695	5.38268	270695	311
94397	94397	Chr01-11638574	1	11638574	94397	5.38041	94397	312
63230	63230	Chr01-8076358	1	8076358	63230	5.37057	63230	313
344430	344430	Chr01-48501621	1	48501621	344430	5.37046	344430	314
542976	542976	Chr01-67427853	1	67427853	542976	5.3649	542976	315
542978	542978	Chr01-67428194	1	67428194	542978	5.3649	542978	316
555131	555131	Chr01-68813043	1	68813043	555131	5.36354	555131	317
650141	650141	Chr01-80260218	1	80260218	650141	5.36068	650141	318
467973	467973	Chr01-60202012	1	60202012	467973	5.36056	467973	319
483616	483616	Chr01-61682416	1	61682416	483616	5.35782	483616	320
640964	640964	Chr01-79395372	1	79395372	640964	5.33924	640964	321
612523	612523	Chr01-75927190	1	75927190	612523	5.33655	612523	322
618061	618061	Chr01-76728501	1	76728501	618061	5.32062	618061	323
63655	63655	Chr01-8133241	1	8133241	63655	5.31187	63655	324
343911	343911	Chr01-48405969	1	48405969	343911	5.30974	343911	325
299276	299276	Chr01-36256275	1	36256275	299276	5.3006	299276	326
285304	285304	Chr01-34039522	1	34039522	285304	5.29891	285304	327
276512	276512	Chr01-32299106	1	32299106	276512	5.2918	276512	328
62840	62840	Chr01-8035911	1	8035911	62840	5.29016	62840	329
62843	62843	Chr01-8036251	1	8036251	62843	5.29016	62843	330
62850	62850	Chr01-8037051	1	8037051	62850	5.29016	62850	331
62881	62881	Chr01-8039936	1	8039936	62881	5.29016	62881	332
62893	62893	Chr01-8042480	1	8042480	62893	5.29016	62893	333
62903	62903	Chr01-8043529	1	8043529	62903	5.29016	62903	334
62904	62904	Chr01-8043531	1	8043531	62904	5.29016	62904	335
62905	62905	Chr01-8043539	1	8043539	62905	5.29016	62905	336
62906	62906	Chr01-8043540	1	8043540	62906	5.29016	62906	337
62907	62907	Chr01-8043633	1	8043633	62907	5.29016	62907	338
62908	62908	Chr01-8044036	1	8044036	62908	5.29016	62908	339
62909	62909	Chr01-8044109	1	8044109	62909	5.29016	62909	340
62978	62978	Chr01-8053943	1	8053943	62978	5.29016	62978	341
62988	62988	Chr01-8054538	1	8054538	62988	5.29016	62988	342
63082	63082	Chr01-8059054	1	8059054	63082	5.29016	63082	343
63108	63108	Chr01-8060868	1	8060868	63108	5.29016	63108	344
63117	63117	Chr01-8063008	1	8063008	63117	5.29016	63117	345
63127	63127	Chr01-8066850	1	8066850	63127	5.29016	63127	346
63148	63148	Chr01-8068392	1	8068392	63148	5.29016	63148	347
63183	63183	Chr01-8073391	1	8073391	63183	5.29016	63183	348
63192	63192	Chr01-8074020	1	8074020	63192	5.29016	63192	349
63221	63221	Chr01-8075963	1	8075963	63221	5.29016	63221	350
63248	63248	Chr01-8079181	1	8079181	63248	5.29016	63248	351
63252	63252	Chr01-8080322	1	8080322	63252	5.29016	63252	352
63273	63273	Chr01-8081698	1	8081698	63273	5.29016	63273	353
63295	63295	Chr01-8082569	1	8082569	63295	5.29016	63295	354
63304	63304	Chr01-8085233	1	8085233	63304	5.29016	63304	355
63305	63305	Chr01-8085327	1	8085327	63305	5.29016	63305	356
63347	63347	Chr01-8095199	1	8095199	63347	5.29016	63347	357
63348	63348	Chr01-8095319	1	8095319	63348	5.29016	63348	358
63356	63356	Chr01-8097324	1	8097324	63356	5.29016	63356	359
63357	63357	Chr01-8097577	1	8097577	63357	5.29016	63357	360
63358	63358	Chr01-8097578	1	8097578	63358	5.29016	63358	361
63365	63365	Chr01-8100710	1	8100710	63365	5.29016	63365	362
63366	63366	Chr01-8100748	1	8100748	63366	5.29016	63366	363
63375	63375	Chr01-8101525	1	8101525	63375	5.29016	63375	364
63376	63376	Chr01-8101573	1	8101573	63376	5.29016	63376	365
63377	63377	Chr01-8101598	1	8101598	63377	5.29016	63377	366
63382	63382	Chr01-8102205	1	8102205	63382	5.29016	63382	367
63398	63398	Chr01-8103819	1	8103819	63398	5.29016	63398	368
63405	63405	Chr01-8104214	1	8104214	63405	5.29016	63405	369
63414	63414	Chr01-8104715	1	8104715	63414	5.29016	63414	370
63415	63415	Chr01-8104732	1	8104732	63415	5.29016	63415	371
63419	63419	Chr01-8105024	1	8105024	63419	5.29016	63419	372
63428	63428	Chr01-8105389	1	8105389	63428	5.29016	63428	373
63430	63430	Chr01-8105544	1	8105544	63430	5.29016	63430	374
63433	63433	Chr01-8105634	1	8105634	63433	5.29016	63433	375
63436	63436	Chr01-8105722	1	8105722	63436	5.29016	63436	376
63439	63439	Chr01-8105814	1	8105814	63439	5.29016	63439	377
63454	63454	Chr01-8106353	1	8106353	63454	5.29016	63454	378
63470	63470	Chr01-8108218	1	8108218	63470	5.29016	63470	379
329133	329133	Chr01-46525203	1	46525203	329133	5.2872	329133	380
532151	532151	Chr01-66331190	1	66331190	532151	5.27914	532151	381
532152	532152	Chr01-66331197	1	66331197	532152	5.27914	532152	382
62899	62899	Chr01-8043379	1	8043379	62899	5.26428	62899	383
618148	618148	Chr01-76741948	1	76741948	618148	5.25598	618148	384
31570	31570	Chr01-3990075	1	3990075	31570	5.25466	31570	385
323900	323900	Chr01-45713106	1	45713106	323900	5.25216	323900	386
452564	452564	Chr01-58850523	1	58850523	452564	5.25062	452564	387
452541	452541	Chr01-58849848	1	58849848	452541	5.25009	452541	388
444156	444156	Chr01-58246871	1	58246871	444156	5.23848	444156	389
606425	606425	Chr01-75273332	1	75273332	606425	5.22407	606425	390
63400	63400	Chr01-8103908	1	8103908	63400	5.22239	63400	391
216458	216458	Chr01-25916420	1	25916420	216458	5.21622	216458	392
335710	335710	Chr01-47490280	1	47490280	335710	5.21367	335710	393
116191	116191	Chr01-14186271	1	14186271	116191	5.20777	116191	394
116202	116202	Chr01-14187277	1	14187277	116202	5.20777	116202	395
116216	116216	Chr01-14188504	1	14188504	116216	5.20777	116216	396
116217	116217	Chr01-14188578	1	14188578	116217	5.20777	116217	397
116222	116222	Chr01-14189244	1	14189244	116222	5.20777	116222	398
116234	116234	Chr01-14191525	1	14191525	116234	5.20777	116234	399
116236	116236	Chr01-14191705	1	14191705	116236	5.20777	116236	400
116242	116242	Chr01-14191990	1	14191990	116242	5.20777	116242	401
116245	116245	Chr01-14192546	1	14192546	116245	5.20777	116245	402
62594	62594	Chr01-8021657	1	8021657	62594	5.20759	62594	403
62635	62635	Chr01-8028121	1	8028121	62635	5.20759	62635	404
62637	62637	Chr01-8028142	1	8028142	62637	5.20759	62637	405
330666	330666	Chr01-46807841	1	46807841	330666	5.20633	330666	406
371175	371175	Chr01-50990707	1	50990707	371175	5.19762	371175	407
579115	579115	Chr01-72388031	1	72388031	579115	5.18877	579115	408
579116	579116	Chr01-72388039	1	72388039	579116	5.18877	579116	409
579117	579117	Chr01-72388053	1	72388053	579117	5.18877	579117	410
579121	579121	Chr01-72388102	1	72388102	579121	5.18877	579121	411
204313	204313	Chr01-24419224	1	24419224	204313	5.18064	204313	412
63463	63463	Chr01-8107830	1	8107830	63463	5.14941	63463	413
63464	63464	Chr01-8107832	1	8107832	63464	5.14941	63464	414
64188	64188	Chr01-8168129	1	8168129	64188	5.14502	64188	415
496363	496363	Chr01-62718892	1	62718892	496363	5.14167	496363	416
270692	270692	Chr01-31331271	1	31331271	270692	5.13851	270692	417
276655	276655	Chr01-32303533	1	32303533	276655	5.10998	276655	418
198097	198097	Chr01-23619160	1	23619160	198097	5.1047	198097	419
643469	643469	Chr01-79580971	1	79580971	643469	5.09744	643469	420
323805	323805	Chr01-45707388	1	45707388	323805	5.0938	323805	421
342360	342360	Chr01-48210946	1	48210946	342360	5.09232	342360	422
276630	276630	Chr01-32302354	1	32302354	276630	5.08868	276630	423
341726	341726	Chr01-48142619	1	48142619	341726	5.08721	341726	424
342890	342890	Chr01-48265520	1	48265520	342890	5.08616	342890	425
286993	286993	Chr01-34213567	1	34213567	286993	5.0825	286993	426
64172	64172	Chr01-8167755	1	8167755	64172	5.08089	64172	427
116220	116220	Chr01-14188840	1	14188840	116220	5.06719	116220	428
116244	116244	Chr01-14192419	1	14192419	116244	5.06719	116244	429
612590	612590	Chr01-75947085	1	75947085	612590	5.06672	612590	430
442721	442721	Chr01-58167353	1	58167353	442721	5.05949	442721	431
442726	442726	Chr01-58167411	1	58167411	442726	5.05949	442726	432
344458	344458	Chr01-48505474	1	48505474	344458	5.05506	344458	433
554921	554921	Chr01-68803114	1	68803114	554921	5.052	554921	434
267126	267126	Chr01-30893104	1	30893104	267126	5.04875	267126	435
116111	116111	Chr01-14173448	1	14173448	116111	5.0487	116111	436
63346	63346	Chr01-8094922	1	8094922	63346	5.04805	63346	437
548595	548595	Chr01-68109329	1	68109329	548595	5.04602	548595	438
17671	17671	Chr01-2259092	1	2259092	17671	5.0416	17671	439
17677	17677	Chr01-2259557	1	2259557	17677	5.0416	17677	440
17678	17678	Chr01-2259604	1	2259604	17678	5.0416	17678	441
17679	17679	Chr01-2259621	1	2259621	17679	5.0416	17679	442
17680	17680	Chr01-2259985	1	2259985	17680	5.0416	17680	443
442816	442816	Chr01-58169670	1	58169670	442816	5.04039	442816	444
342359	342359	Chr01-48210941	1	48210941	342359	5.02746	342359	445
284227	284227	Chr01-33902076	1	33902076	284227	5.01894	284227	446
116196	116196	Chr01-14186827	1	14186827	116196	5.01133	116196	447
602806	602806	Chr01-74905110	1	74905110	602806	5.00464	602806	448
286422	286422	Chr01-34154939	1	34154939	286422	5.00282	286422	449
336204	336204	Chr01-47560125	1	47560125	336204	5.00177	336204	450
334781	334781	Chr01-47397705	1	47397705	334781	4.99997	334781	451
434875	434875	Chr01-57504522	1	57504522	434875	4.99769	434875	452
17614	17614	Chr01-2257030	1	2257030	17614	4.99469	17614	453
618046	618046	Chr01-76727095	1	76727095	618046	4.99411	618046	454
436336	436336	Chr01-57594137	1	57594137	436336	4.9862	436336	455
63471	63471	Chr01-8108416	1	8108416	63471	4.97703	63471	456
187816	187816	Chr01-21813812	1	21813812	187816	4.97652	187816	457
63407	63407	Chr01-8104324	1	8104324	63407	4.96791	63407	458
62543	62543	Chr01-8019319	1	8019319	62543	4.96737	62543	459
62544	62544	Chr01-8019320	1	8019320	62544	4.96737	62544	460
62521	62521	Chr01-8019108	1	8019108	62521	4.95338	62521	461
116123	116123	Chr01-14175809	1	14175809	116123	4.95332	116123	462
452577	452577	Chr01-58851003	1	58851003	452577	4.95144	452577	463
271975	271975	Chr01-31575995	1	31575995	271975	4.95087	271975	464
63286	63286	Chr01-8082421	1	8082421	63286	4.94999	63286	465
63294	63294	Chr01-8082532	1	8082532	63294	4.94999	63294	466
63351	63351	Chr01-8096054	1	8096054	63351	4.94999	63351	467
443833	443833	Chr01-58227812	1	58227812	443833	4.94337	443833	468
65053	65053	Chr01-8269848	1	8269848	65053	4.94125	65053	469
65066	65066	Chr01-8272516	1	8272516	65066	4.94125	65066	470
343909	343909	Chr01-48405846	1	48405846	343909	4.93867	343909	471
343335	343335	Chr01-48344729	1	48344729	343335	4.92328	343335	472
342304	342304	Chr01-48207295	1	48207295	342304	4.9142	342304	473
346251	346251	Chr01-48664116	1	48664116	346251	4.91417	346251	474
646248	646248	Chr01-79820906	1	79820906	646248	4.90866	646248	475
469913	469913	Chr01-60522131	1	60522131	469913	4.90243	469913	476
449493	449493	Chr01-58651511	1	58651511	449493	4.8949	449493	477
63441	63441	Chr01-8105889	1	8105889	63441	4.89318	63441	478
640847	640847	Chr01-79392117	1	79392117	640847	4.89041	640847	479
640848	640848	Chr01-79392120	1	79392120	640848	4.89041	640848	480
640850	640850	Chr01-79392137	1	79392137	640850	4.89041	640850	481
640852	640852	Chr01-79392169	1	79392169	640852	4.89041	640852	482
640853	640853	Chr01-79392174	1	79392174	640853	4.89041	640853	483
640955	640955	Chr01-79395000	1	79395000	640955	4.89041	640955	484
640988	640988	Chr01-79396214	1	79396214	640988	4.89041	640988	485
432612	432612	Chr01-57275177	1	57275177	432612	4.88899	432612	486
432616	432616	Chr01-57275252	1	57275252	432616	4.88899	432616	487
649879	649879	Chr01-80210577	1	80210577	649879	4.88661	649879	488
31831	31831	Chr01-4011222	1	4011222	31831	4.86916	31831	489
31858	31858	Chr01-4016073	1	4016073	31858	4.86916	31858	490
33401	33401	Chr01-4177238	1	4177238	33401	4.86816	33401	491
33421	33421	Chr01-4180240	1	4180240	33421	4.86816	33421	492
33441	33441	Chr01-4181878	1	4181878	33441	4.86816	33441	493
33451	33451	Chr01-4183752	1	4183752	33451	4.86816	33451	494
146722	146722	Chr01-17422564	1	17422564	146722	4.86713	146722	495
493487	493487	Chr01-62524310	1	62524310	493487	4.86552	493487	496
94947	94947	Chr01-11696219	1	11696219	94947	4.86413	94947	497
323359	323359	Chr01-45691144	1	45691144	323359	4.85713	323359	498
62888	62888	Chr01-8041153	1	8041153	62888	4.85617	62888	499
63084	63084	Chr01-8059068	1	8059068	63084	4.85617	63084	500
63374	63374	Chr01-8101429	1	8101429	63374	4.85617	63374	501
63399	63399	Chr01-8103834	1	8103834	63399	4.85617	63399	502
63413	63413	Chr01-8104695	1	8104695	63413	4.85617	63413	503
63458	63458	Chr01-8107166	1	8107166	63458	4.85617	63458	504
63468	63468	Chr01-8108141	1	8108141	63468	4.85617	63468	505
63469	63469	Chr01-8108166	1	8108166	63469	4.85617	63469	506
640987	640987	Chr01-79396134	1	79396134	640987	4.85213	640987	507
329031	329031	Chr01-46448124	1	46448124	329031	4.85064	329031	508
640635	640635	Chr01-79364688	1	79364688	640635	4.84955	640635	509
94395	94395	Chr01-11638254	1	11638254	94395	4.84744	94395	510
493340	493340	Chr01-62508840	1	62508840	493340	4.84409	493340	511
442731	442731	Chr01-58167534	1	58167534	442731	4.84205	442731	512
326831	326831	Chr01-45935892	1	45935892	326831	4.83998	326831	513
260029	260029	Chr01-30306308	1	30306308	260029	4.83256	260029	514
496364	496364	Chr01-62718894	1	62718894	496364	4.83103	496364	515
160068	160068	Chr01-18717741	1	18717741	160068	4.83063	160068	516
637470	637470	Chr01-78948405	1	78948405	637470	4.82733	637470	517
342481	342481	Chr01-48229737	1	48229737	342481	4.81411	342481	518
483570	483570	Chr01-61681199	1	61681199	483570	4.81036	483570	519
645597	645597	Chr01-79737516	1	79737516	645597	4.80951	645597	520
216432	216432	Chr01-25914384	1	25914384	216432	4.80665	216432	521
330778	330778	Chr01-46816421	1	46816421	330778	4.80614	330778	522
286816	286816	Chr01-34192060	1	34192060	286816	4.7965	286816	523
337791	337791	Chr01-47793091	1	47793091	337791	4.79331	337791	524
267199	267199	Chr01-30901710	1	30901710	267199	4.79107	267199	525
281773	281773	Chr01-33520803	1	33520803	281773	4.78407	281773	526
116069	116069	Chr01-14167442	1	14167442	116069	4.78076	116069	527
528828	528828	Chr01-65896890	1	65896890	528828	4.77561	528828	528
151245	151245	Chr01-17745095	1	17745095	151245	4.7754	151245	529
63203	63203	Chr01-8074890	1	8074890	63203	4.7711	63203	530
63435	63435	Chr01-8105690	1	8105690	63435	4.7711	63435	531
555203	555203	Chr01-68824068	1	68824068	555203	4.7656	555203	532
331407	331407	Chr01-46944089	1	46944089	331407	4.75376	331407	533
63323	63323	Chr01-8089985	1	8089985	63323	4.74301	63323	534
273972	273972	Chr01-31928492	1	31928492	273972	4.74301	273972	535
203388	203388	Chr01-24344957	1	24344957	203388	4.73797	203388	536
605282	605282	Chr01-75152627	1	75152627	605282	4.73394	605282	537
234167	234167	Chr01-27822442	1	27822442	234167	4.73278	234167	538
147756	147756	Chr01-17492124	1	17492124	147756	4.72771	147756	539
646914	646914	Chr01-79877769	1	79877769	646914	4.72736	646914	540
640899	640899	Chr01-79393309	1	79393309	640899	4.72301	640899	541
116055	116055	Chr01-14165035	1	14165035	116055	4.71797	116055	542
116059	116059	Chr01-14165347	1	14165347	116059	4.71797	116059	543
116094	116094	Chr01-14169330	1	14169330	116094	4.71797	116094	544
116166	116166	Chr01-14179125	1	14179125	116166	4.71797	116166	545
93271	93271	Chr01-11495955	1	11495955	93271	4.71733	93271	546
646913	646913	Chr01-79877675	1	79877675	646913	4.71703	646913	547
646915	646915	Chr01-79877813	1	79877813	646915	4.71703	646915	548
116148	116148	Chr01-14176714	1	14176714	116148	4.71681	116148	549
65054	65054	Chr01-8269866	1	8269866	65054	4.71224	65054	550
65065	65065	Chr01-8272309	1	8272309	65065	4.71224	65065	551
65090	65090	Chr01-8278876	1	8278876	65090	4.71224	65090	552
227645	227645	Chr01-27048049	1	27048049	227645	4.70916	227645	553
227655	227655	Chr01-27048231	1	27048231	227655	4.70587	227655	554
227656	227656	Chr01-27048259	1	27048259	227656	4.70587	227656	555
227657	227657	Chr01-27048262	1	27048262	227657	4.70587	227657	556
227658	227658	Chr01-27048278	1	27048278	227658	4.70587	227658	557
345836	345836	Chr01-48616159	1	48616159	345836	4.70516	345836	558
606421	606421	Chr01-75272903	1	75272903	606421	4.70367	606421	559
650391	650391	Chr01-80306434	1	80306434	650391	4.69146	650391	560
650488	650488	Chr01-80313040	1	80313040	650488	4.69146	650488	561
650610	650610	Chr01-80327162	1	80327162	650610	4.69146	650610	562
650625	650625	Chr01-80332174	1	80332174	650625	4.69146	650625	563
542993	542993	Chr01-67430560	1	67430560	542993	4.6889	542993	564
640851	640851	Chr01-79392159	1	79392159	640851	4.6861	640851	565
61902	61902	Chr01-7957145	1	7957145	61902	4.6791	61902	566
261342	261342	Chr01-30414588	1	30414588	261342	4.67855	261342	567
65062	65062	Chr01-8271423	1	8271423	65062	4.67352	65062	568
345672	345672	Chr01-48607456	1	48607456	345672	4.67082	345672	569
343047	343047	Chr01-48281044	1	48281044	343047	4.67057	343047	570
436365	436365	Chr01-57594631	1	57594631	436365	4.66695	436365	571
62589	62589	Chr01-8021385	1	8021385	62589	4.66181	62589	572
232199	232199	Chr01-27609847	1	27609847	232199	4.65416	232199	573
276358	276358	Chr01-32274654	1	32274654	276358	4.64199	276358	574
554551	554551	Chr01-68778860	1	68778860	554551	4.63519	554551	575
34731	34731	Chr01-4348272	1	4348272	34731	4.62625	34731	576
342888	342888	Chr01-48265451	1	48265451	342888	4.62245	342888	577
357583	357583	Chr01-49640429	1	49640429	357583	4.62106	357583	578
554920	554920	Chr01-68803107	1	68803107	554920	4.61977	554920	579
63129	63129	Chr01-8066876	1	8066876	63129	4.61701	63129	580
330827	330827	Chr01-46819741	1	46819741	330827	4.60827	330827	581
34596	34596	Chr01-4334631	1	4334631	34596	4.60446	34596	582
435644	435644	Chr01-57549811	1	57549811	435644	4.60413	435644	583
618145	618145	Chr01-76741905	1	76741905	618145	4.5966	618145	584
618146	618146	Chr01-76741908	1	76741908	618146	4.5966	618146	585
618147	618147	Chr01-76741940	1	76741940	618147	4.5966	618147	586
618149	618149	Chr01-76742226	1	76742226	618149	4.5966	618149	587
618150	618150	Chr01-76742397	1	76742397	618150	4.5966	618150	588
265676	265676	Chr01-30794012	1	30794012	265676	4.59288	265676	589
605047	605047	Chr01-75133486	1	75133486	605047	4.59051	605047	590
344135	344135	Chr01-48460946	1	48460946	344135	4.59011	344135	591
640854	640854	Chr01-79392180	1	79392180	640854	4.58412	640854	592
640855	640855	Chr01-79392188	1	79392188	640855	4.58412	640855	593
640856	640856	Chr01-79392193	1	79392193	640856	4.58412	640856	594
271402	271402	Chr01-31445025	1	31445025	271402	4.58407	271402	595
61906	61906	Chr01-7957269	1	7957269	61906	4.57781	61906	596
554630	554630	Chr01-68782484	1	68782484	554630	4.56618	554630	597
31737	31737	Chr01-4001053	1	4001053	31737	4.56327	31737	598
640866	640866	Chr01-79392715	1	79392715	640866	4.56231	640866	599
640912	640912	Chr01-79393529	1	79393529	640912	4.56231	640912	600
640914	640914	Chr01-79393615	1	79393615	640914	4.56231	640914	601
640916	640916	Chr01-79393635	1	79393635	640916	4.56231	640916	602
640918	640918	Chr01-79393778	1	79393778	640918	4.56231	640918	603
640922	640922	Chr01-79393829	1	79393829	640922	4.56231	640922	604
640928	640928	Chr01-79394006	1	79394006	640928	4.56231	640928	605
640930	640930	Chr01-79394032	1	79394032	640930	4.56231	640930	606
640947	640947	Chr01-79394559	1	79394559	640947	4.56231	640947	607
640948	640948	Chr01-79394569	1	79394569	640948	4.56231	640948	608
366324	366324	Chr01-50458894	1	50458894	366324	4.55363	366324	609
366325	366325	Chr01-50458901	1	50458901	366325	4.55363	366325	610
645851	645851	Chr01-79765178	1	79765178	645851	4.55161	645851	611
63324	63324	Chr01-8090304	1	8090304	63324	4.55085	63324	612
31585	31585	Chr01-3991611	1	3991611	31585	4.54136	31585	613
63418	63418	Chr01-8104886	1	8104886	63418	4.53969	63418	614
62508	62508	Chr01-8018833	1	8018833	62508	4.53964	62508	615
62510	62510	Chr01-8018861	1	8018861	62510	4.53964	62510	616
62511	62511	Chr01-8018886	1	8018886	62511	4.53964	62511	617
62513	62513	Chr01-8019036	1	8019036	62513	4.53964	62513	618
62514	62514	Chr01-8019054	1	8019054	62514	4.53964	62514	619
62515	62515	Chr01-8019056	1	8019056	62515	4.53964	62515	620
62516	62516	Chr01-8019058	1	8019058	62516	4.53964	62516	621
62517	62517	Chr01-8019090	1	8019090	62517	4.53964	62517	622
62518	62518	Chr01-8019091	1	8019091	62518	4.53964	62518	623
62519	62519	Chr01-8019102	1	8019102	62519	4.53964	62519	624
62520	62520	Chr01-8019103	1	8019103	62520	4.53964	62520	625
62525	62525	Chr01-8019171	1	8019171	62525	4.53964	62525	626
62527	62527	Chr01-8019202	1	8019202	62527	4.53964	62527	627
62529	62529	Chr01-8019219	1	8019219	62529	4.53964	62529	628
62530	62530	Chr01-8019223	1	8019223	62530	4.53964	62530	629
62531	62531	Chr01-8019227	1	8019227	62531	4.53964	62531	630
62552	62552	Chr01-8019443	1	8019443	62552	4.53964	62552	631
62555	62555	Chr01-8019491	1	8019491	62555	4.53964	62555	632
62556	62556	Chr01-8019505	1	8019505	62556	4.53964	62556	633
63187	63187	Chr01-8073772	1	8073772	63187	4.52932	63187	634
63264	63264	Chr01-8081331	1	8081331	63264	4.52932	63264	635
63265	63265	Chr01-8081346	1	8081346	63265	4.52932	63265	636
63421	63421	Chr01-8105101	1	8105101	63421	4.52932	63421	637
63423	63423	Chr01-8105189	1	8105189	63423	4.52932	63423	638
63460	63460	Chr01-8107437	1	8107437	63460	4.52932	63460	639
63327	63327	Chr01-8090917	1	8090917	63327	4.52849	63327	640
63318	63318	Chr01-8088908	1	8088908	63318	4.52523	63318	641
63322	63322	Chr01-8089954	1	8089954	63322	4.52523	63322	642
63328	63328	Chr01-8091201	1	8091201	63328	4.52523	63328	643
63332	63332	Chr01-8091743	1	8091743	63332	4.52523	63332	644
63335	63335	Chr01-8091856	1	8091856	63335	4.52523	63335	645
279138	279138	Chr01-32959553	1	32959553	279138	4.52439	279138	646
62534	62534	Chr01-8019258	1	8019258	62534	4.52198	62534	647
62535	62535	Chr01-8019261	1	8019261	62535	4.52198	62535	648
62536	62536	Chr01-8019266	1	8019266	62536	4.52198	62536	649
62538	62538	Chr01-8019272	1	8019272	62538	4.52198	62538	650
62539	62539	Chr01-8019284	1	8019284	62539	4.52198	62539	651
62541	62541	Chr01-8019288	1	8019288	62541	4.52198	62541	652
62542	62542	Chr01-8019301	1	8019301	62542	4.52198	62542	653
500102	500102	Chr01-63004390	1	63004390	500102	4.52115	500102	654
299301	299301	Chr01-36260556	1	36260556	299301	4.52095	299301	655
640869	640869	Chr01-79392840	1	79392840	640869	4.51892	640869	656
640882	640882	Chr01-79393150	1	79393150	640882	4.51892	640882	657
640888	640888	Chr01-79393216	1	79393216	640888	4.51583	640888	658
598259	598259	Chr01-74398342	1	74398342	598259	4.51298	598259	659
612489	612489	Chr01-75919609	1	75919609	612489	4.51171	612489	660
568623	568623	Chr01-71210328	1	71210328	568623	4.50924	568623	661
126614	126614	Chr01-15310801	1	15310801	126614	4.5082	126614	662
126617	126617	Chr01-15310876	1	15310876	126617	4.5082	126617	663
572841	572841	Chr01-71698584	1	71698584	572841	4.50589	572841	664
598156	598156	Chr01-74378527	1	74378527	598156	4.5047	598156	665
598157	598157	Chr01-74378534	1	74378534	598157	4.5047	598157	666
598158	598158	Chr01-74378535	1	74378535	598158	4.5047	598158	667
598159	598159	Chr01-74378536	1	74378536	598159	4.5047	598159	668
598160	598160	Chr01-74378541	1	74378541	598160	4.5047	598160	669
272668	272668	Chr01-31776994	1	31776994	272668	4.50403	272668	670
432610	432610	Chr01-57275110	1	57275110	432610	4.50392	432610	671
432615	432615	Chr01-57275234	1	57275234	432615	4.50392	432615	672
432617	432617	Chr01-57275266	1	57275266	432617	4.50392	432617	673
432618	432618	Chr01-57275285	1	57275285	432618	4.50392	432618	674
286763	286763	Chr01-34188320	1	34188320	286763	4.49687	286763	675
598161	598161	Chr01-74378544	1	74378544	598161	4.49231	598161	676
276633	276633	Chr01-32302451	1	32302451	276633	4.48931	276633	677
434915	434915	Chr01-57507928	1	57507928	434915	4.48918	434915	678
618045	618045	Chr01-76727069	1	76727069	618045	4.48243	618045	679
160090	160090	Chr01-18719737	1	18719737	160090	4.47852	160090	680
327135	327135	Chr01-45960872	1	45960872	327135	4.47655	327135	681
118879	118879	Chr01-14450533	1	14450533	118879	4.47529	118879	682
599166	599166	Chr01-74496756	1	74496756	599166	4.47479	599166	683
618034	618034	Chr01-76726825	1	76726825	618034	4.47395	618034	684
618039	618039	Chr01-76726977	1	76726977	618039	4.47395	618039	685
618040	618040	Chr01-76726983	1	76726983	618040	4.47395	618040	686
618041	618041	Chr01-76726999	1	76726999	618041	4.47395	618041	687
618042	618042	Chr01-76727014	1	76727014	618042	4.47395	618042	688
618043	618043	Chr01-76727021	1	76727021	618043	4.47395	618043	689
618044	618044	Chr01-76727024	1	76727024	618044	4.47395	618044	690
63337	63337	Chr01-8092074	1	8092074	63337	4.47135	63337	691
555245	555245	Chr01-68834534	1	68834534	555245	4.46765	555245	692
63309	63309	Chr01-8087551	1	8087551	63309	4.45969	63309	693
63369	63369	Chr01-8101152	1	8101152	63369	4.45926	63369	694
337790	337790	Chr01-47792998	1	47792998	337790	4.45698	337790	695
116205	116205	Chr01-14187560	1	14187560	116205	4.45643	116205	696
116211	116211	Chr01-14188055	1	14188055	116211	4.45643	116211	697
116225	116225	Chr01-14189899	1	14189899	116225	4.45643	116225	698
291206	291206	Chr01-34786328	1	34786328	291206	4.45426	291206	699
442900	442900	Chr01-58174393	1	58174393	442900	4.44378	442900	700
641426	641426	Chr01-79425835	1	79425835	641426	4.44058	641426	701
641474	641474	Chr01-79430009	1	79430009	641474	4.44058	641474	702
641489	641489	Chr01-79432794	1	79432794	641489	4.44058	641489	703
641492	641492	Chr01-79433202	1	79433202	641492	4.44058	641492	704
641526	641526	Chr01-79435333	1	79435333	641526	4.44058	641526	705
641588	641588	Chr01-79439771	1	79439771	641588	4.44058	641588	706
641590	641590	Chr01-79440062	1	79440062	641590	4.44058	641590	707
641601	641601	Chr01-79441176	1	79441176	641601	4.44058	641601	708
641934	641934	Chr01-79469522	1	79469522	641934	4.44058	641934	709
554876	554876	Chr01-68798305	1	68798305	554876	4.43396	554876	710
554877	554877	Chr01-68798366	1	68798366	554877	4.43396	554877	711
554939	554939	Chr01-68804042	1	68804042	554939	4.43396	554939	712
554949	554949	Chr01-68804636	1	68804636	554949	4.43396	554949	713
270701	270701	Chr01-31332240	1	31332240	270701	4.42329	270701	714
63342	63342	Chr01-8093335	1	8093335	63342	4.42144	63342	715
371149	371149	Chr01-50989523	1	50989523	371149	4.41551	371149	716
336349	336349	Chr01-47596000	1	47596000	336349	4.40846	336349	717
17697	17697	Chr01-2260797	1	2260797	17697	4.4075	17697	718
284239	284239	Chr01-33903601	1	33903601	284239	4.40723	284239	719
34328	34328	Chr01-4296963	1	4296963	34328	4.4024	34328	720
34329	34329	Chr01-4297003	1	4297003	34329	4.4024	34329	721
65041	65041	Chr01-8268987	1	8268987	65041	4.39776	65041	722
65058	65058	Chr01-8270527	1	8270527	65058	4.39776	65058	723
65042	65042	Chr01-8269236	1	8269236	65042	4.39692	65042	724
640957	640957	Chr01-79395082	1	79395082	640957	4.39564	640957	725
640970	640970	Chr01-79395896	1	79395896	640970	4.39564	640970	726
641056	641056	Chr01-79397991	1	79397991	641056	4.39564	641056	727
641099	641099	Chr01-79399806	1	79399806	641099	4.39564	641099	728
267700	267700	Chr01-30941875	1	30941875	267700	4.39287	267700	729
348253	348253	Chr01-48845062	1	48845062	348253	4.38665	348253	730
347915	347915	Chr01-48816317	1	48816317	347915	4.38593	347915	731
646917	646917	Chr01-79877885	1	79877885	646917	4.38527	646917	732
520869	520869	Chr01-64874761	1	64874761	520869	4.38215	520869	733
48946	48946	Chr01-6505290	1	6505290	48946	4.38031	48946	734
375482	375482	Chr01-51453243	1	51453243	375482	4.37599	375482	735
375484	375484	Chr01-51453248	1	51453248	375484	4.37599	375484	736
607849	607849	Chr01-75427657	1	75427657	607849	4.36569	607849	737
257752	257752	Chr01-30064916	1	30064916	257752	4.36455	257752	738
493238	493238	Chr01-62492166	1	62492166	493238	4.36386	493238	739
493240	493240	Chr01-62492194	1	62492194	493240	4.36386	493240	740
554902	554902	Chr01-68801961	1	68801961	554902	4.36324	554902	741
554930	554930	Chr01-68803510	1	68803510	554930	4.36324	554930	742
442817	442817	Chr01-58169716	1	58169716	442817	4.35943	442817	743
63178	63178	Chr01-8073175	1	8073175	63178	4.35849	63178	744
63181	63181	Chr01-8073240	1	8073240	63181	4.35849	63181	745
329033	329033	Chr01-46448152	1	46448152	329033	4.35643	329033	746
300725	300725	Chr01-36440320	1	36440320	300725	4.35625	300725	747
345683	345683	Chr01-48608053	1	48608053	345683	4.3548	345683	748
131538	131538	Chr01-15663823	1	15663823	131538	4.3529	131538	749
640875	640875	Chr01-79393097	1	79393097	640875	4.34364	640875	750
640857	640857	Chr01-79392195	1	79392195	640857	4.34297	640857	751
640858	640858	Chr01-79392210	1	79392210	640858	4.34297	640858	752
640859	640859	Chr01-79392214	1	79392214	640859	4.34297	640859	753
640949	640949	Chr01-79394814	1	79394814	640949	4.34297	640949	754
640953	640953	Chr01-79394899	1	79394899	640953	4.34297	640953	755
63175	63175	Chr01-8073099	1	8073099	63175	4.34053	63175	756
65002	65002	Chr01-8254890	1	8254890	65002	4.3402	65002	757
65040	65040	Chr01-8267542	1	8267542	65040	4.3402	65040	758
426816	426816	Chr01-56758569	1	56758569	426816	4.34006	426816	759
167935	167935	Chr01-19449428	1	19449428	167935	4.3379	167935	760
493342	493342	Chr01-62508921	1	62508921	493342	4.3338	493342	761
259214	259214	Chr01-30229471	1	30229471	259214	4.33239	259214	762
259216	259216	Chr01-30229483	1	30229483	259216	4.33239	259216	763
63142	63142	Chr01-8067656	1	8067656	63142	4.33138	63142	764
334325	334325	Chr01-47356425	1	47356425	334325	4.32667	334325	765
499583	499583	Chr01-62958969	1	62958969	499583	4.32449	499583	766
450538	450538	Chr01-58713573	1	58713573	450538	4.32235	450538	767
290172	290172	Chr01-34677072	1	34677072	290172	4.31981	290172	768
357581	357581	Chr01-49640369	1	49640369	357581	4.31917	357581	769
357582	357582	Chr01-49640392	1	49640392	357582	4.31917	357582	770
452587	452587	Chr01-58852394	1	58852394	452587	4.31848	452587	771
73050	73050	Chr01-9559570	1	9559570	73050	4.31227	73050	772
73060	73060	Chr01-9561953	1	9561953	73060	4.31227	73060	773
640860	640860	Chr01-79392240	1	79392240	640860	4.31225	640860	774
640861	640861	Chr01-79392266	1	79392266	640861	4.31225	640861	775
640863	640863	Chr01-79392286	1	79392286	640863	4.31225	640863	776
640864	640864	Chr01-79392300	1	79392300	640864	4.31225	640864	777
640865	640865	Chr01-79392334	1	79392334	640865	4.31225	640865	778
640868	640868	Chr01-79392803	1	79392803	640868	4.31225	640868	779
640870	640870	Chr01-79392889	1	79392889	640870	4.31225	640870	780
640871	640871	Chr01-79392900	1	79392900	640871	4.31225	640871	781
640872	640872	Chr01-79392912	1	79392912	640872	4.31225	640872	782
640900	640900	Chr01-79393314	1	79393314	640900	4.31225	640900	783
640901	640901	Chr01-79393327	1	79393327	640901	4.31225	640901	784
640902	640902	Chr01-79393328	1	79393328	640902	4.31225	640902	785
640904	640904	Chr01-79393341	1	79393341	640904	4.31225	640904	786
640905	640905	Chr01-79393353	1	79393353	640905	4.31225	640905	787
640907	640907	Chr01-79393420	1	79393420	640907	4.31225	640907	788
155602	155602	Chr01-18232425	1	18232425	155602	4.31158	155602	789
155603	155603	Chr01-18232429	1	18232429	155603	4.31158	155603	790
63339	63339	Chr01-8092371	1	8092371	63339	4.30855	63339	791
565390	565390	Chr01-70583132	1	70583132	565390	4.30421	565390	792
482143	482143	Chr01-61581213	1	61581213	482143	4.30389	482143	793
276678	276678	Chr01-32304038	1	32304038	276678	4.30364	276678	794
384500	384500	Chr01-52547807	1	52547807	384500	4.30312	384500	795
116845	116845	Chr01-14266300	1	14266300	116845	4.29841	116845	796
612031	612031	Chr01-75861821	1	75861821	612031	4.29769	612031	797
442791	442791	Chr01-58169098	1	58169098	442791	4.28995	442791	798
605160	605160	Chr01-75143098	1	75143098	605160	4.28645	605160	799
641015	641015	Chr01-79397128	1	79397128	641015	4.2856	641015	800
328896	328896	Chr01-46243588	1	46243588	328896	4.28556	328896	801
31586	31586	Chr01-3991639	1	3991639	31586	4.28423	31586	802
31591	31591	Chr01-3992041	1	3992041	31591	4.28423	31591	803
31616	31616	Chr01-3993110	1	3993110	31616	4.28423	31616	804
31620	31620	Chr01-3993692	1	3993692	31620	4.28423	31620	805
31626	31626	Chr01-3993996	1	3993996	31626	4.28423	31626	806
31686	31686	Chr01-3997321	1	3997321	31686	4.28423	31686	807
31705	31705	Chr01-3997767	1	3997767	31705	4.28423	31705	808
31762	31762	Chr01-4003025	1	4003025	31762	4.28423	31762	809
31763	31763	Chr01-4003030	1	4003030	31763	4.28423	31763	810
31764	31764	Chr01-4003109	1	4003109	31764	4.28423	31764	811
31782	31782	Chr01-4005827	1	4005827	31782	4.28423	31782	812
31789	31789	Chr01-4006923	1	4006923	31789	4.28423	31789	813
31810	31810	Chr01-4009715	1	4009715	31810	4.28423	31810	814
598143	598143	Chr01-74373989	1	74373989	598143	4.28293	598143	815
491770	491770	Chr01-62357702	1	62357702	491770	4.2817	491770	816
646918	646918	Chr01-79877980	1	79877980	646918	4.28093	646918	817
572759	572759	Chr01-71694585	1	71694585	572759	4.27831	572759	818
390888	390888	Chr01-53259775	1	53259775	390888	4.27646	390888	819
194644	194644	Chr01-22746467	1	22746467	194644	4.27445	194644	820
371144	371144	Chr01-50989363	1	50989363	371144	4.27354	371144	821
598165	598165	Chr01-74378771	1	74378771	598165	4.27033	598165	822
286363	286363	Chr01-34151429	1	34151429	286363	4.26622	286363	823
31750	31750	Chr01-4002027	1	4002027	31750	4.26486	31750	824
94619	94619	Chr01-11669725	1	11669725	94619	4.26283	94619	825
94620	94620	Chr01-11669730	1	11669730	94620	4.26283	94620	826
328723	328723	Chr01-46159172	1	46159172	328723	4.26211	328723	827
226364	226364	Chr01-26940107	1	26940107	226364	4.26105	226364	828
162924	162924	Chr01-19034078	1	19034078	162924	4.2566	162924	829
155601	155601	Chr01-18232385	1	18232385	155601	4.25633	155601	830
323355	323355	Chr01-45691078	1	45691078	323355	4.25278	323355	831
323356	323356	Chr01-45691084	1	45691084	323356	4.25278	323356	832
215479	215479	Chr01-25765758	1	25765758	215479	4.24869	215479	833
371136	371136	Chr01-50988938	1	50988938	371136	4.24468	371136	834
504975	504975	Chr01-63488495	1	63488495	504975	4.24449	504975	835
504976	504976	Chr01-63488500	1	63488500	504976	4.24449	504976	836
2833	2833	Chr01-345483	1	345483	2833	4.24045	2833	837
335630	335630	Chr01-47485082	1	47485082	335630	4.24007	335630	838
229172	229172	Chr01-27254385	1	27254385	229172	4.2381	229172	839
57383	57383	Chr01-7454847	1	7454847	57383	4.23719	57383	840
118871	118871	Chr01-14450332	1	14450332	118871	4.22937	118871	841
337665	337665	Chr01-47786601	1	47786601	337665	4.22835	337665	842
33452	33452	Chr01-4183803	1	4183803	33452	4.22736	33452	843
357580	357580	Chr01-49640358	1	49640358	357580	4.22721	357580	844
618126	618126	Chr01-76734797	1	76734797	618126	4.22452	618126	845
493241	493241	Chr01-62492300	1	62492300	493241	4.22429	493241	846
605191	605191	Chr01-75145538	1	75145538	605191	4.22322	605191	847
48943	48943	Chr01-6505215	1	6505215	48943	4.22286	48943	848
62885	62885	Chr01-8041010	1	8041010	62885	4.22053	62885	849
62912	62912	Chr01-8046667	1	8046667	62912	4.22053	62912	850
63040	63040	Chr01-8057186	1	8057186	63040	4.22053	63040	851
63112	63112	Chr01-8061926	1	8061926	63112	4.22053	63112	852
63253	63253	Chr01-8080410	1	8080410	63253	4.22053	63253	853
63268	63268	Chr01-8081423	1	8081423	63268	4.22053	63268	854
63296	63296	Chr01-8083213	1	8083213	63296	4.22053	63296	855
63298	63298	Chr01-8083946	1	8083946	63298	4.22053	63298	856
63299	63299	Chr01-8083947	1	8083947	63299	4.22053	63299	857
63308	63308	Chr01-8086786	1	8086786	63308	4.22053	63308	858
63389	63389	Chr01-8102644	1	8102644	63389	4.22053	63389	859
63390	63390	Chr01-8102647	1	8102647	63390	4.22053	63390	860
63461	63461	Chr01-8107446	1	8107446	63461	4.22053	63461	861
616651	616651	Chr01-76492905	1	76492905	616651	4.22	616651	862
270696	270696	Chr01-31331452	1	31331452	270696	4.21976	270696	863
2739	2739	Chr01-315448	1	315448	2739	4.2193	2739	864
612027	612027	Chr01-75861750	1	75861750	612027	4.21821	612027	865
640897	640897	Chr01-79393285	1	79393285	640897	4.21809	640897	866
134344	134344	Chr01-15869898	1	15869898	134344	4.21732	134344	867
20658	20658	Chr01-2783264	1	2783264	20658	4.21175	20658	868
434872	434872	Chr01-57504482	1	57504482	434872	4.20984	434872	869
291205	291205	Chr01-34786268	1	34786268	291205	4.20956	291205	870
187694	187694	Chr01-21788461	1	21788461	187694	4.20736	187694	871
436770	436770	Chr01-57648540	1	57648540	436770	4.20727	436770	872
553648	553648	Chr01-68673161	1	68673161	553648	4.20665	553648	873
151248	151248	Chr01-17745850	1	17745850	151248	4.2048	151248	874
388683	388683	Chr01-53052228	1	53052228	388683	4.20399	388683	875
493242	493242	Chr01-62492330	1	62492330	493242	4.20038	493242	876
493243	493243	Chr01-62492356	1	62492356	493243	4.20038	493243	877
493244	493244	Chr01-62492367	1	62492367	493244	4.20038	493244	878
493245	493245	Chr01-62492426	1	62492426	493245	4.20038	493245	879
333664	333664	Chr01-47279103	1	47279103	333664	4.19788	333664	880
65028	65028	Chr01-8265041	1	8265041	65028	4.19422	65028	881
432688	432688	Chr01-57280301	1	57280301	432688	4.19404	432688	882
432689	432689	Chr01-57280321	1	57280321	432689	4.19404	432689	883
168040	168040	Chr01-19462718	1	19462718	168040	4.19398	168040	884
388818	388818	Chr01-53060945	1	53060945	388818	4.19013	388818	885
532176	532176	Chr01-66333382	1	66333382	532176	4.18867	532176	886
346087	346087	Chr01-48647147	1	48647147	346087	4.18004	346087	887
618033	618033	Chr01-76726802	1	76726802	618033	4.17911	618033	888
565387	565387	Chr01-70583117	1	70583117	565387	4.17391	565387	889
565389	565389	Chr01-70583126	1	70583126	565389	4.17391	565389	890
65071	65071	Chr01-8274908	1	8274908	65071	4.17347	65071	891
31833	31833	Chr01-4011402	1	4011402	31833	4.17299	31833	892
31834	31834	Chr01-4011679	1	4011679	31834	4.17299	31834	893
31836	31836	Chr01-4012487	1	4012487	31836	4.17299	31836	894
31883	31883	Chr01-4020869	1	4020869	31883	4.17299	31883	895
164524	164524	Chr01-19171439	1	19171439	164524	4.17255	164524	896
62852	62852	Chr01-8038048	1	8038048	62852	4.16849	62852	897
554865	554865	Chr01-68797355	1	68797355	554865	4.16781	554865	898
551549	551549	Chr01-68394774	1	68394774	551549	4.16579	551549	899
178198	178198	Chr01-20663191	1	20663191	178198	4.16461	178198	900
63139	63139	Chr01-8067518	1	8067518	63139	4.16404	63139	901
63140	63140	Chr01-8067581	1	8067581	63140	4.16404	63140	902
63143	63143	Chr01-8067895	1	8067895	63143	4.16404	63143	903
63197	63197	Chr01-8074167	1	8074167	63197	4.16404	63197	904
63216	63216	Chr01-8075595	1	8075595	63216	4.16404	63216	905
63281	63281	Chr01-8082153	1	8082153	63281	4.16404	63281	906
63396	63396	Chr01-8103804	1	8103804	63396	4.16404	63396	907
607711	607711	Chr01-75415810	1	75415810	607711	4.15732	607711	908
116034	116034	Chr01-14162831	1	14162831	116034	4.1573	116034	909
73046	73046	Chr01-9558733	1	9558733	73046	4.15448	73046	910
73047	73047	Chr01-9558868	1	9558868	73047	4.15448	73047	911
73048	73048	Chr01-9559138	1	9559138	73048	4.15448	73048	912
73051	73051	Chr01-9559581	1	9559581	73051	4.15448	73051	913
73052	73052	Chr01-9560363	1	9560363	73052	4.15448	73052	914
73053	73053	Chr01-9560566	1	9560566	73053	4.15448	73053	915
73054	73054	Chr01-9560613	1	9560613	73054	4.15448	73054	916
73055	73055	Chr01-9560841	1	9560841	73055	4.15448	73055	917
73056	73056	Chr01-9560961	1	9560961	73056	4.15448	73056	918
73057	73057	Chr01-9561603	1	9561603	73057	4.15448	73057	919
73058	73058	Chr01-9561631	1	9561631	73058	4.15448	73058	920
73061	73061	Chr01-9562004	1	9562004	73061	4.15448	73061	921
63349	63349	Chr01-8095468	1	8095468	63349	4.15358	63349	922
65030	65030	Chr01-8265128	1	8265128	65030	4.14919	65030	923
94396	94396	Chr01-11638420	1	11638420	94396	4.14691	94396	924
148005	148005	Chr01-17501201	1	17501201	148005	4.14684	148005	925
328425	328425	Chr01-46128045	1	46128045	328425	4.14469	328425	926
551551	551551	Chr01-68394841	1	68394841	551551	4.14178	551551	927
551562	551562	Chr01-68395001	1	68395001	551562	4.14178	551562	928
551575	551575	Chr01-68395416	1	68395416	551575	4.14178	551575	929
551576	551576	Chr01-68395451	1	68395451	551576	4.14178	551576	930
63174	63174	Chr01-8073096	1	8073096	63174	4.1395	63174	931
63176	63176	Chr01-8073101	1	8073101	63176	4.1395	63176	932
17610	17610	Chr01-2256646	1	2256646	17610	4.13877	17610	933
555204	555204	Chr01-68824790	1	68824790	555204	4.13524	555204	934
31663	31663	Chr01-3995341	1	3995341	31663	4.13449	31663	935
597757	597757	Chr01-74320789	1	74320789	597757	4.13429	597757	936
597829	597829	Chr01-74323024	1	74323024	597829	4.13429	597829	937
89025	89025	Chr01-11077138	1	11077138	89025	4.13383	89025	938
293935	293935	Chr01-35226308	1	35226308	293935	4.13322	293935	939
161156	161156	Chr01-18861929	1	18861929	161156	4.13107	161156	940
65017	65017	Chr01-8263752	1	8263752	65017	4.12186	65017	941
62021	62021	Chr01-7962600	1	7962600	62021	4.11889	62021	942
62022	62022	Chr01-7962602	1	7962602	62022	4.11889	62022	943
62029	62029	Chr01-7963711	1	7963711	62029	4.11889	62029	944
612028	612028	Chr01-75861789	1	75861789	612028	4.11498	612028	945
612029	612029	Chr01-75861791	1	75861791	612029	4.11498	612029	946
612030	612030	Chr01-75861796	1	75861796	612030	4.11498	612030	947
612032	612032	Chr01-75861837	1	75861837	612032	4.11498	612032	948
483640	483640	Chr01-61683147	1	61683147	483640	4.11405	483640	949
483641	483641	Chr01-61683149	1	61683149	483641	4.11405	483641	950
579114	579114	Chr01-72388001	1	72388001	579114	4.10661	579114	951
17611	17611	Chr01-2256810	1	2256810	17611	4.10523	17611	952
63194	63194	Chr01-8074085	1	8074085	63194	4.10438	63194	953
63195	63195	Chr01-8074099	1	8074099	63195	4.10438	63195	954
329040	329040	Chr01-46448725	1	46448725	329040	4.10433	329040	955
63179	63179	Chr01-8073235	1	8073235	63179	4.10278	63179	956
31719	31719	Chr01-3998758	1	3998758	31719	4.10274	31719	957
260306	260306	Chr01-30338616	1	30338616	260306	4.09771	260306	958
612026	612026	Chr01-75861717	1	75861717	612026	4.09692	612026	959
612033	612033	Chr01-75861867	1	75861867	612033	4.09692	612033	960
116100	116100	Chr01-14169614	1	14169614	116100	4.09582	116100	961
23359	23359	Chr01-3090665	1	3090665	23359	4.08733	23359	962
31467	31467	Chr01-3979283	1	3979283	31467	4.08038	31467	963
65050	65050	Chr01-8269733	1	8269733	65050	4.07999	65050	964
610199	610199	Chr01-75636596	1	75636596	610199	4.07531	610199	965
554550	554550	Chr01-68778815	1	68778815	554550	4.07289	554550	966
260049	260049	Chr01-30310896	1	30310896	260049	4.07261	260049	967
640697	640697	Chr01-79370961	1	79370961	640697	4.06653	640697	968
640699	640699	Chr01-79371703	1	79371703	640699	4.06653	640699	969
640704	640704	Chr01-79372275	1	79372275	640704	4.06653	640704	970
640708	640708	Chr01-79372426	1	79372426	640708	4.06653	640708	971
640724	640724	Chr01-79374671	1	79374671	640724	4.06653	640724	972
227654	227654	Chr01-27048230	1	27048230	227654	4.06312	227654	973
73045	73045	Chr01-9558292	1	9558292	73045	4.06138	73045	974
232677	232677	Chr01-27678070	1	27678070	232677	4.05846	232677	975
323407	323407	Chr01-45692881	1	45692881	323407	4.05804	323407	976
17624	17624	Chr01-2257368	1	2257368	17624	4.0562	17624	977
64167	64167	Chr01-8167343	1	8167343	64167	4.04739	64167	978
636187	636187	Chr01-78795004	1	78795004	636187	4.0446	636187	979
125059	125059	Chr01-15202110	1	15202110	125059	4.04386	125059	980
645012	645012	Chr01-79665745	1	79665745	645012	4.04367	645012	981
61910	61910	Chr01-7957430	1	7957430	61910	4.04291	61910	982
61914	61914	Chr01-7957613	1	7957613	61914	4.04291	61914	983
61921	61921	Chr01-7957729	1	7957729	61921	4.04291	61921	984
61936	61936	Chr01-7958083	1	7958083	61936	4.04291	61936	985
61937	61937	Chr01-7958084	1	7958084	61937	4.04291	61937	986
555133	555133	Chr01-68813133	1	68813133	555133	4.04197	555133	987
605029	605029	Chr01-75132676	1	75132676	605029	4.03869	605029	988
64986	64986	Chr01-8248314	1	8248314	64986	4.03694	64986	989
64993	64993	Chr01-8251198	1	8251198	64993	4.03694	64993	990
65005	65005	Chr01-8259195	1	8259195	65005	4.03694	65005	991
65009	65009	Chr01-8260357	1	8260357	65009	4.03694	65009	992
65010	65010	Chr01-8260409	1	8260409	65010	4.03694	65010	993
65034	65034	Chr01-8265324	1	8265324	65034	4.03694	65034	994
65006	65006	Chr01-8259813	1	8259813	65006	4.03677	65006	995
63147	63147	Chr01-8068128	1	8068128	63147	4.03675	63147	996
63150	63150	Chr01-8068470	1	8068470	63150	4.03675	63150	997
63162	63162	Chr01-8072517	1	8072517	63162	4.03675	63162	998
63164	63164	Chr01-8072566	1	8072566	63164	4.03675	63164	999
63213	63213	Chr01-8075486	1	8075486	63213	4.03675	63213	1000
63251	63251	Chr01-8079898	1	8079898	63251	4.03675	63251	1001
63302	63302	Chr01-8085062	1	8085062	63302	4.03675	63302	1002
613881	613881	Chr01-76167300	1	76167300	613881	4.0354	613881	1003
96056	96056	Chr01-11786287	1	11786287	96056	4.03143	96056	1004
96138	96138	Chr01-11789962	1	11789962	96138	4.03143	96138	1005
144079	144079	Chr01-17138268	1	17138268	144079	4.03083	144079	1006
605190	605190	Chr01-75145215	1	75145215	605190	4.02887	605190	1007
65015	65015	Chr01-8261623	1	8261623	65015	4.02794	65015	1008
34736	34736	Chr01-4348396	1	4348396	34736	4.02641	34736	1009
528763	528763	Chr01-65891858	1	65891858	528763	4.02587	528763	1010
136435	136435	Chr01-16429618	1	16429618	136435	4.02308	136435	1011
323358	323358	Chr01-45691135	1	45691135	323358	4.0198	323358	1012
62488	62488	Chr01-8018310	1	8018310	62488	4.01976	62488	1013
493339	493339	Chr01-62508819	1	62508819	493339	4.01716	493339	1014
640670	640670	Chr01-79368089	1	79368089	640670	4.01473	640670	1015
62928	62928	Chr01-8049120	1	8049120	62928	4.01291	62928	1016
62929	62929	Chr01-8049121	1	8049121	62929	4.01291	62929	1017
63118	63118	Chr01-8063794	1	8063794	63118	4.01291	63118	1018
63219	63219	Chr01-8075921	1	8075921	63219	4.00742	63219	1019
496249	496249	Chr01-62713955	1	62713955	496249	4.00315	496249	1020
496250	496250	Chr01-62713969	1	62713969	496250	4.00315	496250	1021
496251	496251	Chr01-62713997	1	62713997	496251	4.00315	496251	1022
323913	323913	Chr01-45713754	1	45713754	323913	4.00313	323913	1023
232241	232241	Chr01-27612670	1	27612670	232241	4.00163	232241	1024
473336	473336	Chr01-60807943	1	60807943	473336	4.0012	473336	1025
63145	63145	Chr01-8068074	1	8068074	63145	4.00042	63145	1026
432646	432646	Chr01-57278425	1	57278425	432646	3.99661	432646	1027
650167	650167	Chr01-80265873	1	80265873	650167	3.99486	650167	1028
641390	641390	Chr01-79424593	1	79424593	641390	3.99442	641390	1029
60341	60341	Chr01-7766875	1	7766875	60341	3.99274	60341	1030
551554	551554	Chr01-68394876	1	68394876	551554	3.99108	551554	1031
551571	551571	Chr01-68395212	1	68395212	551571	3.99108	551571	1032
551579	551579	Chr01-68395494	1	68395494	551579	3.99108	551579	1033
311587	311587	Chr01-38482021	1	38482021	311587	3.99052	311587	1034
72846	72846	Chr01-9535952	1	9535952	72846	3.9884	72846	1035
343606	343606	Chr01-48375780	1	48375780	343606	3.98542	343606	1036
567832	567832	Chr01-71048798	1	71048798	567832	3.97959	567832	1037
286790	286790	Chr01-34190176	1	34190176	286790	3.97854	286790	1038
266801	266801	Chr01-30856540	1	30856540	266801	3.97503	266801	1039
449495	449495	Chr01-58651807	1	58651807	449495	3.97421	449495	1040
474213	474213	Chr01-60847641	1	60847641	474213	3.96789	474213	1041
474219	474219	Chr01-60847943	1	60847943	474219	3.96789	474219	1042
474220	474220	Chr01-60847944	1	60847944	474220	3.96789	474220	1043
278941	278941	Chr01-32900996	1	32900996	278941	3.96565	278941	1044
493239	493239	Chr01-62492182	1	62492182	493239	3.96547	493239	1045
444470	444470	Chr01-58263093	1	58263093	444470	3.96507	444470	1046
444471	444471	Chr01-58263126	1	58263126	444471	3.96507	444471	1047
616655	616655	Chr01-76493067	1	76493067	616655	3.9644	616655	1048
64985	64985	Chr01-8247148	1	8247148	64985	3.96281	64985	1049
641913	641913	Chr01-79468107	1	79468107	641913	3.96207	641913	1050
641914	641914	Chr01-79468111	1	79468111	641914	3.96207	641914	1051
641915	641915	Chr01-79468113	1	79468113	641915	3.96207	641915	1052
302455	302455	Chr01-36948923	1	36948923	302455	3.95961	302455	1053
62894	62894	Chr01-8042663	1	8042663	62894	3.95924	62894	1054
270647	270647	Chr01-31328599	1	31328599	270647	3.95544	270647	1055
62563	62563	Chr01-8020559	1	8020559	62563	3.95387	62563	1056
62564	62564	Chr01-8020566	1	8020566	62564	3.95387	62564	1057
62565	62565	Chr01-8020588	1	8020588	62565	3.95387	62565	1058
62566	62566	Chr01-8020594	1	8020594	62566	3.95387	62566	1059
62568	62568	Chr01-8020665	1	8020665	62568	3.95387	62568	1060
62571	62571	Chr01-8020853	1	8020853	62571	3.95387	62571	1061
62572	62572	Chr01-8020859	1	8020859	62572	3.95387	62572	1062
62573	62573	Chr01-8020862	1	8020862	62573	3.95387	62573	1063
62575	62575	Chr01-8020949	1	8020949	62575	3.95387	62575	1064
62576	62576	Chr01-8020988	1	8020988	62576	3.95387	62576	1065
62577	62577	Chr01-8021015	1	8021015	62577	3.95387	62577	1066
62578	62578	Chr01-8021043	1	8021043	62578	3.95387	62578	1067
62579	62579	Chr01-8021044	1	8021044	62579	3.95387	62579	1068
62580	62580	Chr01-8021053	1	8021053	62580	3.95387	62580	1069
62583	62583	Chr01-8021223	1	8021223	62583	3.95387	62583	1070
62585	62585	Chr01-8021265	1	8021265	62585	3.95387	62585	1071
618158	618158	Chr01-76743363	1	76743363	618158	3.95372	618158	1072
555238	555238	Chr01-68834123	1	68834123	555238	3.95106	555238	1073
555239	555239	Chr01-68834213	1	68834213	555239	3.95106	555239	1074
555240	555240	Chr01-68834281	1	68834281	555240	3.95106	555240	1075
555241	555241	Chr01-68834336	1	68834336	555241	3.95106	555241	1076
555243	555243	Chr01-68834396	1	68834396	555243	3.95106	555243	1077
555244	555244	Chr01-68834496	1	68834496	555244	3.95106	555244	1078
116128	116128	Chr01-14176111	1	14176111	116128	3.94609	116128	1079
605194	605194	Chr01-75146901	1	75146901	605194	3.94345	605194	1080
65026	65026	Chr01-8264949	1	8264949	65026	3.94055	65026	1081
554878	554878	Chr01-68798376	1	68798376	554878	3.9363	554878	1082
554879	554879	Chr01-68798378	1	68798378	554879	3.9363	554879	1083
554880	554880	Chr01-68798711	1	68798711	554880	3.9363	554880	1084
554882	554882	Chr01-68798979	1	68798979	554882	3.9363	554882	1085
554883	554883	Chr01-68799023	1	68799023	554883	3.9363	554883	1086
554884	554884	Chr01-68799058	1	68799058	554884	3.9363	554884	1087
554885	554885	Chr01-68799135	1	68799135	554885	3.9363	554885	1088
554886	554886	Chr01-68799219	1	68799219	554886	3.9363	554886	1089
554887	554887	Chr01-68799406	1	68799406	554887	3.9363	554887	1090
554888	554888	Chr01-68799426	1	68799426	554888	3.9363	554888	1091
554889	554889	Chr01-68799623	1	68799623	554889	3.9363	554889	1092
554890	554890	Chr01-68799888	1	68799888	554890	3.9363	554890	1093
554891	554891	Chr01-68800240	1	68800240	554891	3.9363	554891	1094
554892	554892	Chr01-68800270	1	68800270	554892	3.9363	554892	1095
554894	554894	Chr01-68801016	1	68801016	554894	3.9363	554894	1096
554896	554896	Chr01-68801374	1	68801374	554896	3.9363	554896	1097
554897	554897	Chr01-68801438	1	68801438	554897	3.9363	554897	1098
554898	554898	Chr01-68801583	1	68801583	554898	3.9363	554898	1099
554899	554899	Chr01-68801784	1	68801784	554899	3.9363	554899	1100
554900	554900	Chr01-68801813	1	68801813	554900	3.9363	554900	1101
554901	554901	Chr01-68801822	1	68801822	554901	3.9363	554901	1102
554904	554904	Chr01-68802018	1	68802018	554904	3.9363	554904	1103
554909	554909	Chr01-68802501	1	68802501	554909	3.9363	554909	1104
554925	554925	Chr01-68803268	1	68803268	554925	3.9363	554925	1105
554926	554926	Chr01-68803334	1	68803334	554926	3.9363	554926	1106
554943	554943	Chr01-68804379	1	68804379	554943	3.9363	554943	1107
554945	554945	Chr01-68804383	1	68804383	554945	3.9363	554945	1108
554946	554946	Chr01-68804580	1	68804580	554946	3.9363	554946	1109
554947	554947	Chr01-68804608	1	68804608	554947	3.9363	554947	1110
554950	554950	Chr01-68804808	1	68804808	554950	3.9363	554950	1111
528703	528703	Chr01-65889188	1	65889188	528703	3.93597	528703	1112
61609	61609	Chr01-7897670	1	7897670	61609	3.93526	61609	1113
645829	645829	Chr01-79760441	1	79760441	645829	3.93287	645829	1114
227648	227648	Chr01-27048088	1	27048088	227648	3.93265	227648	1115
491774	491774	Chr01-62358000	1	62358000	491774	3.93035	491774	1116
572736	572736	Chr01-71693095	1	71693095	572736	3.92629	572736	1117
277333	277333	Chr01-32494274	1	32494274	277333	3.92185	277333	1118
329128	329128	Chr01-46524212	1	46524212	329128	3.92077	329128	1119
278927	278927	Chr01-32899031	1	32899031	278927	3.92028	278927	1120
77143	77143	Chr01-9930471	1	9930471	77143	3.91984	77143	1121
77600	77600	Chr01-9986743	1	9986743	77600	3.91984	77600	1122
77697	77697	Chr01-10000284	1	10000284	77697	3.91984	77697	1123
118862	118862	Chr01-14449833	1	14449833	118862	3.91726	118862	1124
434822	434822	Chr01-57500986	1	57500986	434822	3.91525	434822	1125
496248	496248	Chr01-62713896	1	62713896	496248	3.91488	496248	1126
598152	598152	Chr01-74378033	1	74378033	598152	3.91421	598152	1127
565294	565294	Chr01-70579984	1	70579984	565294	3.91328	565294	1128
565300	565300	Chr01-70580657	1	70580657	565300	3.91328	565300	1129
565301	565301	Chr01-70580674	1	70580674	565301	3.91328	565301	1130
565302	565302	Chr01-70580739	1	70580739	565302	3.91328	565302	1131
565303	565303	Chr01-70580740	1	70580740	565303	3.91328	565303	1132
565304	565304	Chr01-70580745	1	70580745	565304	3.91328	565304	1133
565305	565305	Chr01-70580747	1	70580747	565305	3.91328	565305	1134
565306	565306	Chr01-70580748	1	70580748	565306	3.91328	565306	1135
565307	565307	Chr01-70580751	1	70580751	565307	3.91328	565307	1136
565311	565311	Chr01-70580873	1	70580873	565311	3.91328	565311	1137
565319	565319	Chr01-70581447	1	70581447	565319	3.91328	565319	1138
565377	565377	Chr01-70582756	1	70582756	565377	3.91328	565377	1139
565378	565378	Chr01-70582836	1	70582836	565378	3.91328	565378	1140
565379	565379	Chr01-70582838	1	70582838	565379	3.91328	565379	1141
565411	565411	Chr01-70584393	1	70584393	565411	3.91328	565411	1142
565450	565450	Chr01-70586717	1	70586717	565450	3.91328	565450	1143
271974	271974	Chr01-31575934	1	31575934	271974	3.91043	271974	1144
147822	147822	Chr01-17494740	1	17494740	147822	3.91008	147822	1145
147823	147823	Chr01-17494741	1	17494741	147823	3.91008	147823	1146
570659	570659	Chr01-71473358	1	71473358	570659	3.90692	570659	1147
8950	8950	Chr01-1259755	1	1259755	8950	3.90688	8950	1148
60274	60274	Chr01-7754197	1	7754197	60274	3.90502	60274	1149
72667	72667	Chr01-9509558	1	9509558	72667	3.90364	72667	1150
72669	72669	Chr01-9509661	1	9509661	72669	3.90364	72669	1151
345810	345810	Chr01-48614771	1	48614771	345810	3.90281	345810	1152
337468	337468	Chr01-47774899	1	47774899	337468	3.90013	337468	1153
645825	645825	Chr01-79760280	1	79760280	645825	3.89988	645825	1154
645826	645826	Chr01-79760309	1	79760309	645826	3.89988	645826	1155
645828	645828	Chr01-79760386	1	79760386	645828	3.89988	645828	1156
116843	116843	Chr01-14266105	1	14266105	116843	3.89915	116843	1157
328682	328682	Chr01-46156721	1	46156721	328682	3.89731	328682	1158
17669	17669	Chr01-2258843	1	2258843	17669	3.89498	17669	1159
72679	72679	Chr01-9510763	1	9510763	72679	3.89462	72679	1160
495535	495535	Chr01-62641104	1	62641104	495535	3.8928	495535	1161
63238	63238	Chr01-8077566	1	8077566	63238	3.89247	63238	1162
123757	123757	Chr01-15011822	1	15011822	123757	3.88797	123757	1163
72676	72676	Chr01-9510128	1	9510128	72676	3.88226	72676	1164
216433	216433	Chr01-25914465	1	25914465	216433	3.87754	216433	1165
650822	650822	Chr01-80358946	1	80358946	650822	3.87572	650822	1166
650964	650964	Chr01-80379568	1	80379568	650964	3.87572	650964	1167
650970	650970	Chr01-80380400	1	80380400	650970	3.87572	650970	1168
540009	540009	Chr01-67150809	1	67150809	540009	3.87383	540009	1169
540010	540010	Chr01-67150818	1	67150818	540010	3.87383	540010	1170
357579	357579	Chr01-49640348	1	49640348	357579	3.87068	357579	1171
259489	259489	Chr01-30248191	1	30248191	259489	3.86702	259489	1172
148352	148352	Chr01-17513575	1	17513575	148352	3.8666	148352	1173
542981	542981	Chr01-67428552	1	67428552	542981	3.86607	542981	1174
323135	323135	Chr01-45654719	1	45654719	323135	3.86379	323135	1175
551401	551401	Chr01-68388125	1	68388125	551401	3.86199	551401	1176
31694	31694	Chr01-3997518	1	3997518	31694	3.8603	31694	1177
597416	597416	Chr01-74305198	1	74305198	597416	3.85977	597416	1178
72584	72584	Chr01-9490272	1	9490272	72584	3.85957	72584	1179
496375	496375	Chr01-62719042	1	62719042	496375	3.85797	496375	1180
496376	496376	Chr01-62719043	1	62719043	496376	3.85797	496376	1181
496377	496377	Chr01-62719051	1	62719051	496377	3.85797	496377	1182
442727	442727	Chr01-58167462	1	58167462	442727	3.85708	442727	1183
442729	442729	Chr01-58167482	1	58167482	442729	3.85708	442729	1184
49240	49240	Chr01-6532873	1	6532873	49240	3.85643	49240	1185
482902	482902	Chr01-61643602	1	61643602	482902	3.8553	482902	1186
637908	637908	Chr01-79023965	1	79023965	637908	3.84863	637908	1187
640798	640798	Chr01-79384837	1	79384837	640798	3.84742	640798	1188
640975	640975	Chr01-79395972	1	79395972	640975	3.84605	640975	1189
275088	275088	Chr01-32071811	1	32071811	275088	3.84589	275088	1190
62035	62035	Chr01-7963949	1	7963949	62035	3.84553	62035	1191
495527	495527	Chr01-62638509	1	62638509	495527	3.84318	495527	1192
495528	495528	Chr01-62638545	1	62638545	495528	3.84318	495528	1193
495529	495529	Chr01-62638584	1	62638584	495529	3.84318	495529	1194
495531	495531	Chr01-62638712	1	62638712	495531	3.84318	495531	1195
495538	495538	Chr01-62641260	1	62641260	495538	3.84318	495538	1196
495539	495539	Chr01-62641317	1	62641317	495539	3.84318	495539	1197
495542	495542	Chr01-62641364	1	62641364	495542	3.84318	495542	1198
495546	495546	Chr01-62641699	1	62641699	495546	3.84318	495546	1199
495553	495553	Chr01-62642292	1	62642292	495553	3.84318	495553	1200
495554	495554	Chr01-62642304	1	62642304	495554	3.84318	495554	1201
495557	495557	Chr01-62642672	1	62642672	495557	3.84318	495557	1202
495560	495560	Chr01-62642829	1	62642829	495560	3.84318	495560	1203
495563	495563	Chr01-62643030	1	62643030	495563	3.84318	495563	1204
495565	495565	Chr01-62643097	1	62643097	495565	3.84318	495565	1205
495566	495566	Chr01-62643218	1	62643218	495566	3.84318	495566	1206
520846	520846	Chr01-64873787	1	64873787	520846	3.84107	520846	1207
520860	520860	Chr01-64874136	1	64874136	520860	3.84107	520860	1208
521309	521309	Chr01-64953863	1	64953863	521309	3.83859	521309	1209
650173	650173	Chr01-80266555	1	80266555	650173	3.83819	650173	1210
572673	572673	Chr01-71689998	1	71689998	572673	3.8368	572673	1211
551327	551327	Chr01-68383742	1	68383742	551327	3.83636	551327	1212
551328	551328	Chr01-68383837	1	68383837	551328	3.83636	551328	1213
551329	551329	Chr01-68383873	1	68383873	551329	3.83636	551329	1214
551330	551330	Chr01-68384025	1	68384025	551330	3.83636	551330	1215
551360	551360	Chr01-68386266	1	68386266	551360	3.83636	551360	1216
551361	551361	Chr01-68386303	1	68386303	551361	3.83636	551361	1217
551375	551375	Chr01-68386822	1	68386822	551375	3.83636	551375	1218
551376	551376	Chr01-68386863	1	68386863	551376	3.83636	551376	1219
618199	618199	Chr01-76748869	1	76748869	618199	3.83361	618199	1220
162865	162865	Chr01-19029342	1	19029342	162865	3.83344	162865	1221
259150	259150	Chr01-30223915	1	30223915	259150	3.83281	259150	1222
6644	6644	Chr01-1059115	1	1059115	6644	3.83275	6644	1223
7469	7469	Chr01-1165337	1	1165337	7469	3.83275	7469	1224
598145	598145	Chr01-74374429	1	74374429	598145	3.82976	598145	1225
598146	598146	Chr01-74374521	1	74374521	598146	3.82976	598146	1226
650393	650393	Chr01-80307418	1	80307418	650393	3.82974	650393	1227
605164	605164	Chr01-75143244	1	75143244	605164	3.82812	605164	1228
323899	323899	Chr01-45713017	1	45713017	323899	3.82783	323899	1229
143402	143402	Chr01-17076668	1	17076668	143402	3.82723	143402	1230
117262	117262	Chr01-14289108	1	14289108	117262	3.8271	117262	1231
117263	117263	Chr01-14289109	1	14289109	117263	3.8271	117263	1232
117264	117264	Chr01-14289110	1	14289110	117264	3.8271	117264	1233
117265	117265	Chr01-14289178	1	14289178	117265	3.8271	117265	1234
650525	650525	Chr01-80317605	1	80317605	650525	3.82699	650525	1235
449497	449497	Chr01-58651859	1	58651859	449497	3.82528	449497	1236
263093	263093	Chr01-30615108	1	30615108	263093	3.82236	263093	1237
227643	227643	Chr01-27047972	1	27047972	227643	3.82076	227643	1238
270672	270672	Chr01-31330004	1	31330004	270672	3.82051	270672	1239
33381	33381	Chr01-4169095	1	4169095	33381	3.81863	33381	1240
432613	432613	Chr01-57275227	1	57275227	432613	3.81529	432613	1241
444469	444469	Chr01-58263057	1	58263057	444469	3.81282	444469	1242
64887	64887	Chr01-8229127	1	8229127	64887	3.81164	64887	1243
91231	91231	Chr01-11280589	1	11280589	91231	3.81012	91231	1244
335216	335216	Chr01-47446230	1	47446230	335216	3.80968	335216	1245
335217	335217	Chr01-47446241	1	47446241	335217	3.80968	335217	1246
117279	117279	Chr01-14289774	1	14289774	117279	3.80959	117279	1247
117309	117309	Chr01-14290560	1	14290560	117309	3.80959	117309	1248
645827	645827	Chr01-79760341	1	79760341	645827	3.80842	645827	1249
337793	337793	Chr01-47793389	1	47793389	337793	3.80706	337793	1250
518869	518869	Chr01-64658094	1	64658094	518869	3.80522	518869	1251
592767	592767	Chr01-73800320	1	73800320	592767	3.8051	592767	1252
543252	543252	Chr01-67468708	1	67468708	543252	3.80498	543252	1253
640896	640896	Chr01-79393282	1	79393282	640896	3.80404	640896	1254
276797	276797	Chr01-32308215	1	32308215	276797	3.80049	276797	1255
64285	64285	Chr01-8170858	1	8170858	64285	3.80045	64285	1256
215524	215524	Chr01-25768778	1	25768778	215524	3.79978	215524	1257
215525	215525	Chr01-25768779	1	25768779	215525	3.79978	215525	1258
436225	436225	Chr01-57592501	1	57592501	436225	3.79954	436225	1259
598151	598151	Chr01-74377519	1	74377519	598151	3.79929	598151	1260
436220	436220	Chr01-57592280	1	57592280	436220	3.79882	436220	1261
435814	435814	Chr01-57560635	1	57560635	435814	3.79534	435814	1262
579691	579691	Chr01-72474528	1	72474528	579691	3.79423	579691	1263
565321	565321	Chr01-70581512	1	70581512	565321	3.79008	565321	1264
565445	565445	Chr01-70586656	1	70586656	565445	3.79008	565445	1265
565446	565446	Chr01-70586674	1	70586674	565446	3.79008	565446	1266
565447	565447	Chr01-70586677	1	70586677	565447	3.79008	565447	1267
565449	565449	Chr01-70586691	1	70586691	565449	3.79008	565449	1268
231543	231543	Chr01-27559437	1	27559437	231543	3.78753	231543	1269
285247	285247	Chr01-34033569	1	34033569	285247	3.78731	285247	1270
73041	73041	Chr01-9557775	1	9557775	73041	3.78717	73041	1271
521286	521286	Chr01-64953611	1	64953611	521286	3.78594	521286	1272
33438	33438	Chr01-4181776	1	4181776	33438	3.78584	33438	1273
570469	570469	Chr01-71451233	1	71451233	570469	3.78376	570469	1274
62616	62616	Chr01-8022604	1	8022604	62616	3.78114	62616	1275
491795	491795	Chr01-62361210	1	62361210	491795	3.78096	491795	1276
452596	452596	Chr01-58853501	1	58853501	452596	3.78048	452596	1277
33325	33325	Chr01-4166092	1	4166092	33325	3.77797	33325	1278
33402	33402	Chr01-4177273	1	4177273	33402	3.77797	33402	1279
33407	33407	Chr01-4178079	1	4178079	33407	3.77797	33407	1280
33417	33417	Chr01-4179970	1	4179970	33417	3.77797	33417	1281
33419	33419	Chr01-4180139	1	4180139	33419	3.77797	33419	1282
33429	33429	Chr01-4180653	1	4180653	33429	3.77797	33429	1283
33430	33430	Chr01-4180853	1	4180853	33430	3.77797	33430	1284
33445	33445	Chr01-4182718	1	4182718	33445	3.77797	33445	1285
605024	605024	Chr01-75132455	1	75132455	605024	3.77595	605024	1286
598233	598233	Chr01-74390991	1	74390991	598233	3.77569	598233	1287
44025	44025	Chr01-5948703	1	5948703	44025	3.771	44025	1288
94997	94997	Chr01-11697647	1	11697647	94997	3.76931	94997	1289
554792	554792	Chr01-68788192	1	68788192	554792	3.76769	554792	1290
528764	528764	Chr01-65892073	1	65892073	528764	3.76544	528764	1291
72886	72886	Chr01-9538838	1	9538838	72886	3.76538	72886	1292
328876	328876	Chr01-46242180	1	46242180	328876	3.76388	328876	1293
257495	257495	Chr01-30040461	1	30040461	257495	3.76199	257495	1294
605185	605185	Chr01-75144692	1	75144692	605185	3.75997	605185	1295
68046	68046	Chr01-8786120	1	8786120	68046	3.7576	68046	1296
63319	63319	Chr01-8088936	1	8088936	63319	3.75545	63319	1297
63331	63331	Chr01-8091614	1	8091614	63331	3.75545	63331	1298
63333	63333	Chr01-8091744	1	8091744	63333	3.75545	63333	1299
641563	641563	Chr01-79436399	1	79436399	641563	3.75512	641563	1300
231193	231193	Chr01-27523936	1	27523936	231193	3.75498	231193	1301
637911	637911	Chr01-79024726	1	79024726	637911	3.75494	637911	1302
118828	118828	Chr01-14449527	1	14449527	118828	3.75416	118828	1303
123427	123427	Chr01-14989431	1	14989431	123427	3.75264	123427	1304
123428	123428	Chr01-14989469	1	14989469	123428	3.75264	123428	1305
650475	650475	Chr01-80311755	1	80311755	650475	3.75222	650475	1306
650533	650533	Chr01-80317781	1	80317781	650533	3.75222	650533	1307
650555	650555	Chr01-80318302	1	80318302	650555	3.75222	650555	1308
650562	650562	Chr01-80318521	1	80318521	650562	3.75222	650562	1309
650589	650589	Chr01-80320269	1	80320269	650589	3.75222	650589	1310
650660	650660	Chr01-80341401	1	80341401	650660	3.75222	650660	1311
148324	148324	Chr01-17511275	1	17511275	148324	3.7488	148324	1312
637906	637906	Chr01-79023578	1	79023578	637906	3.74686	637906	1313
637907	637907	Chr01-79023867	1	79023867	637907	3.74686	637907	1314
637909	637909	Chr01-79024106	1	79024106	637909	3.74686	637909	1315
33540	33540	Chr01-4195491	1	4195491	33540	3.74593	33540	1316
434917	434917	Chr01-57507951	1	57507951	434917	3.74424	434917	1317
264847	264847	Chr01-30747409	1	30747409	264847	3.74416	264847	1318
291602	291602	Chr01-34859476	1	34859476	291602	3.74309	291602	1319
116137	116137	Chr01-14176385	1	14176385	116137	3.7422	116137	1320
500364	500364	Chr01-63027270	1	63027270	500364	3.74193	500364	1321
379274	379274	Chr01-51791357	1	51791357	379274	3.74179	379274	1322
554911	554911	Chr01-68802576	1	68802576	554911	3.74166	554911	1323
554912	554912	Chr01-68802581	1	68802581	554912	3.74166	554912	1324
554913	554913	Chr01-68802604	1	68802604	554913	3.74166	554913	1325
554916	554916	Chr01-68802793	1	68802793	554916	3.74166	554916	1326
554927	554927	Chr01-68803395	1	68803395	554927	3.74166	554927	1327
554929	554929	Chr01-68803499	1	68803499	554929	3.74166	554929	1328
554933	554933	Chr01-68803656	1	68803656	554933	3.74166	554933	1329
554934	554934	Chr01-68803773	1	68803773	554934	3.74166	554934	1330
276304	276304	Chr01-32264056	1	32264056	276304	3.74116	276304	1331
383438	383438	Chr01-52456537	1	52456537	383438	3.74025	383438	1332
599117	599117	Chr01-74485352	1	74485352	599117	3.73966	599117	1333
495259	495259	Chr01-62620270	1	62620270	495259	3.73648	495259	1334
532174	532174	Chr01-66333352	1	66333352	532174	3.73636	532174	1335
532175	532175	Chr01-66333361	1	66333361	532175	3.73636	532175	1336
64101	64101	Chr01-8163766	1	8163766	64101	3.73586	64101	1337
156703	156703	Chr01-18366628	1	18366628	156703	3.73538	156703	1338
520847	520847	Chr01-64873798	1	64873798	520847	3.73439	520847	1339
310932	310932	Chr01-38383466	1	38383466	310932	3.73329	310932	1340
650669	650669	Chr01-80343879	1	80343879	650669	3.72935	650669	1341
650681	650681	Chr01-80345470	1	80345470	650681	3.72935	650681	1342
650754	650754	Chr01-80352432	1	80352432	650754	3.72935	650754	1343
650785	650785	Chr01-80353724	1	80353724	650785	3.72935	650785	1344
650786	650786	Chr01-80353845	1	80353845	650786	3.72935	650786	1345
650803	650803	Chr01-80355307	1	80355307	650803	3.72935	650803	1346
650805	650805	Chr01-80355352	1	80355352	650805	3.72935	650805	1347
650847	650847	Chr01-80364651	1	80364651	650847	3.72935	650847	1348
650865	650865	Chr01-80365694	1	80365694	650865	3.72935	650865	1349
650872	650872	Chr01-80366056	1	80366056	650872	3.72935	650872	1350
650873	650873	Chr01-80366186	1	80366186	650873	3.72935	650873	1351
650875	650875	Chr01-80366204	1	80366204	650875	3.72935	650875	1352
650877	650877	Chr01-80366276	1	80366276	650877	3.72935	650877	1353
650939	650939	Chr01-80374098	1	80374098	650939	3.72935	650939	1354
650940	650940	Chr01-80374667	1	80374667	650940	3.72935	650940	1355
651007	651007	Chr01-80386225	1	80386225	651007	3.72935	651007	1356
651009	651009	Chr01-80387635	1	80387635	651009	3.72935	651009	1357
651047	651047	Chr01-80392892	1	80392892	651047	3.72935	651047	1358
30632	30632	Chr01-3858831	1	3858831	30632	3.72856	30632	1359
534067	534067	Chr01-66557253	1	66557253	534067	3.72855	534067	1360
65011	65011	Chr01-8260944	1	8260944	65011	3.72782	65011	1361
650915	650915	Chr01-80372233	1	80372233	650915	3.72772	650915	1362
72659	72659	Chr01-9506959	1	9506959	72659	3.72425	72659	1363
603007	603007	Chr01-74928844	1	74928844	603007	3.7211	603007	1364
565318	565318	Chr01-70581373	1	70581373	565318	3.72001	565318	1365
344141	344141	Chr01-48461176	1	48461176	344141	3.71947	344141	1366
640709	640709	Chr01-79372549	1	79372549	640709	3.71937	640709	1367
520348	520348	Chr01-64788740	1	64788740	520348	3.71888	520348	1368
329005	329005	Chr01-46425224	1	46425224	329005	3.71688	329005	1369
131539	131539	Chr01-15663824	1	15663824	131539	3.71271	131539	1370
72185	72185	Chr01-9401533	1	9401533	72185	3.71099	72185	1371
131544	131544	Chr01-15663920	1	15663920	131544	3.70592	131544	1372
335593	335593	Chr01-47474361	1	47474361	335593	3.70544	335593	1373
79217	79217	Chr01-10125851	1	10125851	79217	3.7023	79217	1374
436119	436119	Chr01-57582042	1	57582042	436119	3.70178	436119	1375
436152	436152	Chr01-57586863	1	57586863	436152	3.70178	436152	1376
436455	436455	Chr01-57599354	1	57599354	436455	3.70178	436455	1377
336202	336202	Chr01-47560103	1	47560103	336202	3.70015	336202	1378
551467	551467	Chr01-68392708	1	68392708	551467	3.69903	551467	1379
551468	551468	Chr01-68392719	1	68392719	551468	3.69903	551468	1380
317500	317500	Chr01-39574048	1	39574048	317500	3.69753	317500	1381
526912	526912	Chr01-65630811	1	65630811	526912	3.69635	526912	1382
441591	441591	Chr01-57973270	1	57973270	441591	3.69524	441591	1383
441592	441592	Chr01-57973307	1	57973307	441592	3.69524	441592	1384
441593	441593	Chr01-57973324	1	57973324	441593	3.69524	441593	1385
441594	441594	Chr01-57973327	1	57973327	441594	3.69524	441594	1386
441595	441595	Chr01-57973331	1	57973331	441595	3.69524	441595	1387
441596	441596	Chr01-57973343	1	57973343	441596	3.69524	441596	1388
441597	441597	Chr01-57973347	1	57973347	441597	3.69524	441597	1389
441599	441599	Chr01-57973496	1	57973496	441599	3.69524	441599	1390
441600	441600	Chr01-57973516	1	57973516	441600	3.69524	441600	1391
441601	441601	Chr01-57973517	1	57973517	441601	3.69524	441601	1392
441602	441602	Chr01-57973851	1	57973851	441602	3.69524	441602	1393
441603	441603	Chr01-57973865	1	57973865	441603	3.69524	441603	1394
441604	441604	Chr01-57973884	1	57973884	441604	3.69524	441604	1395
441605	441605	Chr01-57973899	1	57973899	441605	3.69524	441605	1396
441606	441606	Chr01-57973925	1	57973925	441606	3.69524	441606	1397
441607	441607	Chr01-57973934	1	57973934	441607	3.69524	441607	1398
441609	441609	Chr01-57973949	1	57973949	441609	3.69524	441609	1399
441610	441610	Chr01-57973991	1	57973991	441610	3.69524	441610	1400
441611	441611	Chr01-57974070	1	57974070	441611	3.69524	441611	1401
441612	441612	Chr01-57974076	1	57974076	441612	3.69524	441612	1402
436293	436293	Chr01-57593616	1	57593616	436293	3.69127	436293	1403
63902	63902	Chr01-8156367	1	8156367	63902	3.68944	63902	1404
489826	489826	Chr01-62130515	1	62130515	489826	3.68919	489826	1405
33478	33478	Chr01-4185455	1	4185455	33478	3.68789	33478	1406
33509	33509	Chr01-4187801	1	4187801	33509	3.68789	33509	1407
269321	269321	Chr01-31149243	1	31149243	269321	3.68771	269321	1408
8953	8953	Chr01-1259979	1	1259979	8953	3.68654	8953	1409
337714	337714	Chr01-47788804	1	47788804	337714	3.68494	337714	1410
62851	62851	Chr01-8037307	1	8037307	62851	3.68387	62851	1411
640973	640973	Chr01-79395960	1	79395960	640973	3.6834	640973	1412
61614	61614	Chr01-7898071	1	7898071	61614	3.68211	61614	1413
61615	61615	Chr01-7898073	1	7898073	61615	3.68211	61615	1414
116159	116159	Chr01-14177490	1	14177490	116159	3.68069	116159	1415
160077	160077	Chr01-18718164	1	18718164	160077	3.67951	160077	1416
160078	160078	Chr01-18718232	1	18718232	160078	3.67951	160078	1417
520834	520834	Chr01-64873135	1	64873135	520834	3.67743	520834	1418
520856	520856	Chr01-64873925	1	64873925	520856	3.67743	520856	1419
268329	268329	Chr01-31015599	1	31015599	268329	3.67733	268329	1420
605049	605049	Chr01-75133700	1	75133700	605049	3.67669	605049	1421
528742	528742	Chr01-65890671	1	65890671	528742	3.67539	528742	1422
116120	116120	Chr01-14175268	1	14175268	116120	3.6753	116120	1423
640986	640986	Chr01-79396099	1	79396099	640986	3.67509	640986	1424
268355	268355	Chr01-31016552	1	31016552	268355	3.67356	268355	1425
268357	268357	Chr01-31016575	1	31016575	268357	3.67356	268357	1426
276659	276659	Chr01-32303587	1	32303587	276659	3.6733	276659	1427
452598	452598	Chr01-58853942	1	58853942	452598	3.67227	452598	1428
118470	118470	Chr01-14409928	1	14409928	118470	3.67205	118470	1429
532173	532173	Chr01-66333346	1	66333346	532173	3.66909	532173	1430
260695	260695	Chr01-30365669	1	30365669	260695	3.66874	260695	1431
422062	422062	Chr01-56169499	1	56169499	422062	3.66867	422062	1432
312791	312791	Chr01-38697745	1	38697745	312791	3.66865	312791	1433
286210	286210	Chr01-34133889	1	34133889	286210	3.66847	286210	1434
565388	565388	Chr01-70583121	1	70583121	565388	3.66699	565388	1435
63208	63208	Chr01-8075070	1	8075070	63208	3.66319	63208	1436
482877	482877	Chr01-61643050	1	61643050	482877	3.66293	482877	1437
160093	160093	Chr01-18720212	1	18720212	160093	3.65854	160093	1438
160097	160097	Chr01-18720685	1	18720685	160097	3.65854	160097	1439
160089	160089	Chr01-18719488	1	18719488	160089	3.65359	160089	1440
436266	436266	Chr01-57593262	1	57593262	436266	3.65089	436266	1441
436287	436287	Chr01-57593537	1	57593537	436287	3.65089	436287	1442
436288	436288	Chr01-57593540	1	57593540	436288	3.65089	436288	1443
276720	276720	Chr01-32305635	1	32305635	276720	3.64699	276720	1444
598149	598149	Chr01-74376557	1	74376557	598149	3.64017	598149	1445
265243	265243	Chr01-30777062	1	30777062	265243	3.63673	265243	1446
227626	227626	Chr01-27047708	1	27047708	227626	3.63672	227626	1447
227627	227627	Chr01-27047720	1	27047720	227627	3.63672	227627	1448
227628	227628	Chr01-27047740	1	27047740	227628	3.63672	227628	1449
227629	227629	Chr01-27047742	1	27047742	227629	3.63672	227629	1450
491759	491759	Chr01-62356330	1	62356330	491759	3.63646	491759	1451
65301	65301	Chr01-8316709	1	8316709	65301	3.63553	65301	1452
65302	65302	Chr01-8316740	1	8316740	65302	3.63553	65302	1453
65303	65303	Chr01-8316741	1	8316741	65303	3.63553	65303	1454
605193	605193	Chr01-75146797	1	75146797	605193	3.63362	605193	1455
282506	282506	Chr01-33661599	1	33661599	282506	3.63086	282506	1456
606432	606432	Chr01-75273937	1	75273937	606432	3.63077	606432	1457
571112	571112	Chr01-71519307	1	71519307	571112	3.63075	571112	1458
630748	630748	Chr01-78322815	1	78322815	630748	3.62885	630748	1459
285463	285463	Chr01-34056338	1	34056338	285463	3.62884	285463	1460
285590	285590	Chr01-34072950	1	34072950	285590	3.62884	285590	1461
285661	285661	Chr01-34086626	1	34086626	285661	3.62884	285661	1462
285724	285724	Chr01-34094616	1	34094616	285724	3.62884	285724	1463
285926	285926	Chr01-34108113	1	34108113	285926	3.62884	285926	1464
286092	286092	Chr01-34127394	1	34127394	286092	3.62884	286092	1465
286108	286108	Chr01-34128424	1	34128424	286108	3.62884	286108	1466
286217	286217	Chr01-34134836	1	34134836	286217	3.62884	286217	1467
286285	286285	Chr01-34139541	1	34139541	286285	3.62884	286285	1468
286452	286452	Chr01-34156926	1	34156926	286452	3.62884	286452	1469
286827	286827	Chr01-34192804	1	34192804	286827	3.62884	286827	1470
287059	287059	Chr01-34223624	1	34223624	287059	3.62884	287059	1471
287162	287162	Chr01-34243272	1	34243272	287162	3.62884	287162	1472
287163	287163	Chr01-34243303	1	34243303	287163	3.62884	287163	1473
287250	287250	Chr01-34250938	1	34250938	287250	3.62884	287250	1474
287268	287268	Chr01-34253052	1	34253052	287268	3.62884	287268	1475
287602	287602	Chr01-34329552	1	34329552	287602	3.62884	287602	1476
287645	287645	Chr01-34343004	1	34343004	287645	3.62884	287645	1477
287664	287664	Chr01-34345745	1	34345745	287664	3.62884	287664	1478
287687	287687	Chr01-34351434	1	34351434	287687	3.62884	287687	1479
287727	287727	Chr01-34357283	1	34357283	287727	3.62884	287727	1480
287744	287744	Chr01-34358520	1	34358520	287744	3.62884	287744	1481
287750	287750	Chr01-34358946	1	34358946	287750	3.62884	287750	1482
317048	317048	Chr01-39480408	1	39480408	317048	3.62713	317048	1483
72137	72137	Chr01-9392619	1	9392619	72137	3.62061	72137	1484
118861	118861	Chr01-14449807	1	14449807	118861	3.61884	118861	1485
118863	118863	Chr01-14449839	1	14449839	118863	3.61884	118863	1486
72999	72999	Chr01-9550187	1	9550187	72999	3.61819	72999	1487
73000	73000	Chr01-9550290	1	9550290	73000	3.61819	73000	1488
73007	73007	Chr01-9550812	1	9550812	73007	3.61819	73007	1489
496371	496371	Chr01-62718975	1	62718975	496371	3.61144	496371	1490
496378	496378	Chr01-62719080	1	62719080	496378	3.61144	496378	1491
496379	496379	Chr01-62719083	1	62719083	496379	3.61144	496379	1492
290249	290249	Chr01-34686460	1	34686460	290249	3.61068	290249	1493
550366	550366	Chr01-68306822	1	68306822	550366	3.61067	550366	1494
550396	550396	Chr01-68308208	1	68308208	550396	3.61067	550396	1495
550407	550407	Chr01-68308730	1	68308730	550407	3.61067	550407	1496
550408	550408	Chr01-68308745	1	68308745	550408	3.61067	550408	1497
162923	162923	Chr01-19034066	1	19034066	162923	3.60834	162923	1498
131540	131540	Chr01-15663826	1	15663826	131540	3.60472	131540	1499
32238	32238	Chr01-4055448	1	4055448	32238	3.60412	32238	1500
571062	571062	Chr01-71514358	1	71514358	571062	3.60226	571062	1501
571064	571064	Chr01-71514373	1	71514373	571064	3.60226	571064	1502
571065	571065	Chr01-71514415	1	71514415	571065	3.60226	571065	1503
226363	226363	Chr01-26940054	1	26940054	226363	3.60157	226363	1504
645397	645397	Chr01-79714390	1	79714390	645397	3.59984	645397	1505
645399	645399	Chr01-79714667	1	79714667	645399	3.59984	645399	1506
645414	645414	Chr01-79716481	1	79716481	645414	3.59984	645414	1507
156698	156698	Chr01-18366421	1	18366421	156698	3.59508	156698	1508
62603	62603	Chr01-8022290	1	8022290	62603	3.59417	62603	1509
62605	62605	Chr01-8022298	1	8022298	62605	3.59417	62605	1510
62611	62611	Chr01-8022388	1	8022388	62611	3.59417	62611	1511
61650	61650	Chr01-7903902	1	7903902	61650	3.59375	61650	1512
63352	63352	Chr01-8096102	1	8096102	63352	3.59031	63352	1513
285595	285595	Chr01-34075216	1	34075216	285595	3.58975	285595	1514
507598	507598	Chr01-63779514	1	63779514	507598	3.58863	507598	1515
600348	600348	Chr01-74593197	1	74593197	600348	3.58604	600348	1516
384301	384301	Chr01-52530363	1	52530363	384301	3.58397	384301	1517
65109	65109	Chr01-8287119	1	8287119	65109	3.58225	65109	1518
543032	543032	Chr01-67438396	1	67438396	543032	3.58068	543032	1519
554678	554678	Chr01-68784144	1	68784144	554678	3.58028	554678	1520
554679	554679	Chr01-68784145	1	68784145	554679	3.58028	554679	1521
554680	554680	Chr01-68784189	1	68784189	554680	3.58028	554680	1522
554681	554681	Chr01-68784204	1	68784204	554681	3.58028	554681	1523
554683	554683	Chr01-68784211	1	68784211	554683	3.58028	554683	1524
554710	554710	Chr01-68785334	1	68785334	554710	3.58028	554710	1525
645572	645572	Chr01-79735569	1	79735569	645572	3.57431	645572	1526
148388	148388	Chr01-17515215	1	17515215	148388	3.57349	148388	1527
167996	167996	Chr01-19455612	1	19455612	167996	3.57236	167996	1528
565366	565366	Chr01-70582339	1	70582339	565366	3.57205	565366	1529
565438	565438	Chr01-70586437	1	70586437	565438	3.57205	565438	1530
565439	565439	Chr01-70586444	1	70586444	565439	3.57205	565439	1531
336284	336284	Chr01-47586691	1	47586691	336284	3.56988	336284	1532
287572	287572	Chr01-34324841	1	34324841	287572	3.5697	287572	1533
362237	362237	Chr01-50063815	1	50063815	362237	3.56949	362237	1534
187832	187832	Chr01-21814557	1	21814557	187832	3.56919	187832	1535
442864	442864	Chr01-58172005	1	58172005	442864	3.56832	442864	1536
61927	61927	Chr01-7957825	1	7957825	61927	3.56826	61927	1537
565478	565478	Chr01-70603372	1	70603372	565478	3.56782	565478	1538
147837	147837	Chr01-17495069	1	17495069	147837	3.56662	147837	1539
483658	483658	Chr01-61683812	1	61683812	483658	3.56632	483658	1540
483659	483659	Chr01-61683813	1	61683813	483659	3.56632	483659	1541
118471	118471	Chr01-14409936	1	14409936	118471	3.56581	118471	1542
162233	162233	Chr01-18975534	1	18975534	162233	3.56494	162233	1543
1312	1312	Chr01-173894	1	173894	1312	3.56367	1312	1544
554948	554948	Chr01-68804635	1	68804635	554948	3.5615	554948	1545
344064	344064	Chr01-48453159	1	48453159	344064	3.55864	344064	1546
63237	63237	Chr01-8076867	1	8076867	63237	3.55794	63237	1547
34319	34319	Chr01-4295573	1	4295573	34319	3.5547	34319	1548
48940	48940	Chr01-6505178	1	6505178	48940	3.55382	48940	1549
455195	455195	Chr01-59122098	1	59122098	455195	3.5532	455195	1550
573076	573076	Chr01-71716646	1	71716646	573076	3.55228	573076	1551
573077	573077	Chr01-71716648	1	71716648	573077	3.55228	573077	1552
573078	573078	Chr01-71716650	1	71716650	573078	3.55228	573078	1553
573079	573079	Chr01-71716651	1	71716651	573079	3.55228	573079	1554
573080	573080	Chr01-71716653	1	71716653	573080	3.55228	573080	1555
573084	573084	Chr01-71717362	1	71717362	573084	3.55228	573084	1556
573091	573091	Chr01-71717712	1	71717712	573091	3.55228	573091	1557
64272	64272	Chr01-8170507	1	8170507	64272	3.54988	64272	1558
264846	264846	Chr01-30747408	1	30747408	264846	3.54847	264846	1559
335140	335140	Chr01-47440195	1	47440195	335140	3.54831	335140	1560
65044	65044	Chr01-8269473	1	8269473	65044	3.54723	65044	1561
650904	650904	Chr01-80371574	1	80371574	650904	3.54686	650904	1562
33541	33541	Chr01-4195969	1	4195969	33541	3.54637	33541	1563
554881	554881	Chr01-68798749	1	68798749	554881	3.54325	554881	1564
554903	554903	Chr01-68801997	1	68801997	554903	3.54325	554903	1565
329067	329067	Chr01-46497219	1	46497219	329067	3.54175	329067	1566
234716	234716	Chr01-27851561	1	27851561	234716	3.54115	234716	1567
234717	234717	Chr01-27851562	1	27851562	234717	3.54115	234717	1568
521327	521327	Chr01-64954292	1	64954292	521327	3.54077	521327	1569
650143	650143	Chr01-80261080	1	80261080	650143	3.54021	650143	1570
62522	62522	Chr01-8019151	1	8019151	62522	3.54009	62522	1571
285482	285482	Chr01-34058118	1	34058118	285482	3.53988	285482	1572
146783	146783	Chr01-17430772	1	17430772	146783	3.53789	146783	1573
33400	33400	Chr01-4177200	1	4177200	33400	3.53752	33400	1574
72165	72165	Chr01-9398143	1	9398143	72165	3.53707	72165	1575
495570	495570	Chr01-62643253	1	62643253	495570	3.53475	495570	1576
442732	442732	Chr01-58167855	1	58167855	442732	3.53381	442732	1577
640766	640766	Chr01-79379219	1	79379219	640766	3.52501	640766	1578
280511	280511	Chr01-33235954	1	33235954	280511	3.52362	280511	1579
442735	442735	Chr01-58168027	1	58168027	442735	3.52281	442735	1580
551475	551475	Chr01-68392871	1	68392871	551475	3.52227	551475	1581
383788	383788	Chr01-52481995	1	52481995	383788	3.52002	383788	1582
63321	63321	Chr01-8089737	1	8089737	63321	3.51854	63321	1583
146577	146577	Chr01-17408382	1	17408382	146577	3.51849	146577	1584
33786	33786	Chr01-4221699	1	4221699	33786	3.51806	33786	1585
348254	348254	Chr01-48845086	1	48845086	348254	3.5179	348254	1586
605030	605030	Chr01-75132860	1	75132860	605030	3.51679	605030	1587
227630	227630	Chr01-27047752	1	27047752	227630	3.51201	227630	1588
571066	571066	Chr01-71514439	1	71514439	571066	3.51028	571066	1589
432611	432611	Chr01-57275134	1	57275134	432611	3.50894	432611	1590
62036	62036	Chr01-7964456	1	7964456	62036	3.50847	62036	1591
62037	62037	Chr01-7964524	1	7964524	62037	3.50847	62037	1592
62119	62119	Chr01-7973971	1	7973971	62119	3.50847	62119	1593
62149	62149	Chr01-7976241	1	7976241	62149	3.50847	62149	1594
76825	76825	Chr01-9909620	1	9909620	76825	3.5083	76825	1595
63786	63786	Chr01-8146891	1	8146891	63786	3.50739	63786	1596
33439	33439	Chr01-4181779	1	4181779	33439	3.50635	33439	1597
268358	268358	Chr01-31016623	1	31016623	268358	3.50559	268358	1598
63310	63310	Chr01-8087864	1	8087864	63310	3.50397	63310	1599
63330	63330	Chr01-8091379	1	8091379	63330	3.50397	63330	1600
329978	329978	Chr01-46666035	1	46666035	329978	3.50392	329978	1601
160356	160356	Chr01-18779292	1	18779292	160356	3.50335	160356	1602
641223	641223	Chr01-79405880	1	79405880	641223	3.49826	641223	1603
344144	344144	Chr01-48461283	1	48461283	344144	3.49742	344144	1604
602145	602145	Chr01-74844134	1	74844134	602145	3.49715	602145	1605
333511	333511	Chr01-47261271	1	47261271	333511	3.49655	333511	1606
59008	59008	Chr01-7643093	1	7643093	59008	3.4965	59008	1607
260698	260698	Chr01-30365739	1	30365739	260698	3.49609	260698	1608
65075	65075	Chr01-8275419	1	8275419	65075	3.49586	65075	1609
65300	65300	Chr01-8316698	1	8316698	65300	3.49428	65300	1610
618075	618075	Chr01-76728728	1	76728728	618075	3.49015	618075	1611
641361	641361	Chr01-79423004	1	79423004	641361	3.48918	641361	1612
641367	641367	Chr01-79423703	1	79423703	641367	3.48918	641367	1613
641376	641376	Chr01-79424161	1	79424161	641376	3.48918	641376	1614
641378	641378	Chr01-79424293	1	79424293	641378	3.48918	641378	1615
641382	641382	Chr01-79424372	1	79424372	641382	3.48918	641382	1616
641387	641387	Chr01-79424469	1	79424469	641387	3.48918	641387	1617
641405	641405	Chr01-79425003	1	79425003	641405	3.48918	641405	1618
641406	641406	Chr01-79425048	1	79425048	641406	3.48918	641406	1619
641409	641409	Chr01-79425283	1	79425283	641409	3.48918	641409	1620
641410	641410	Chr01-79425287	1	79425287	641410	3.48918	641410	1621
641411	641411	Chr01-79425293	1	79425293	641411	3.48918	641411	1622
641412	641412	Chr01-79425297	1	79425297	641412	3.48918	641412	1623
641413	641413	Chr01-79425472	1	79425472	641413	3.48918	641413	1624
641417	641417	Chr01-79425631	1	79425631	641417	3.48918	641417	1625
641420	641420	Chr01-79425692	1	79425692	641420	3.48918	641420	1626
641483	641483	Chr01-79431248	1	79431248	641483	3.48918	641483	1627
641515	641515	Chr01-79434952	1	79434952	641515	3.48918	641515	1628
641519	641519	Chr01-79435071	1	79435071	641519	3.48918	641519	1629
641607	641607	Chr01-79441473	1	79441473	641607	3.48918	641607	1630
641662	641662	Chr01-79445006	1	79445006	641662	3.48918	641662	1631
641700	641700	Chr01-79445718	1	79445718	641700	3.48918	641700	1632
641741	641741	Chr01-79448301	1	79448301	641741	3.48918	641741	1633
641747	641747	Chr01-79448459	1	79448459	641747	3.48918	641747	1634
641859	641859	Chr01-79455116	1	79455116	641859	3.48918	641859	1635
641871	641871	Chr01-79462178	1	79462178	641871	3.48918	641871	1636
641895	641895	Chr01-79464814	1	79464814	641895	3.48918	641895	1637
641896	641896	Chr01-79465147	1	79465147	641896	3.48918	641896	1638
641907	641907	Chr01-79467078	1	79467078	641907	3.48918	641907	1639
641920	641920	Chr01-79468563	1	79468563	641920	3.48918	641920	1640
641931	641931	Chr01-79469018	1	79469018	641931	3.48918	641931	1641
32235	32235	Chr01-4055338	1	4055338	32235	3.48854	32235	1642
32236	32236	Chr01-4055351	1	4055351	32236	3.48854	32236	1643
31565	31565	Chr01-3989305	1	3989305	31565	3.48623	31565	1644
319111	319111	Chr01-39965595	1	39965595	319111	3.48491	319111	1645
118877	118877	Chr01-14450411	1	14450411	118877	3.48358	118877	1646
650600	650600	Chr01-80320901	1	80320901	650600	3.48348	650600	1647
393752	393752	Chr01-53573121	1	53573121	393752	3.48001	393752	1648
393753	393753	Chr01-53573131	1	53573131	393753	3.48001	393753	1649
72223	72223	Chr01-9407917	1	9407917	72223	3.47903	72223	1650
72229	72229	Chr01-9409758	1	9409758	72229	3.47903	72229	1651
72235	72235	Chr01-9411422	1	9411422	72235	3.47903	72235	1652
328725	328725	Chr01-46159249	1	46159249	328725	3.47755	328725	1653
34128	34128	Chr01-4272875	1	4272875	34128	3.47751	34128	1654
333240	333240	Chr01-47236862	1	47236862	333240	3.47696	333240	1655
573100	573100	Chr01-71718925	1	71718925	573100	3.47641	573100	1656
334216	334216	Chr01-47351386	1	47351386	334216	3.47455	334216	1657
551402	551402	Chr01-68388163	1	68388163	551402	3.47369	551402	1658
1391	1391	Chr01-182829	1	182829	1391	3.47067	1391	1659
598153	598153	Chr01-74378210	1	74378210	598153	3.46906	598153	1660
63401	63401	Chr01-8104030	1	8104030	63401	3.46884	63401	1661
554905	554905	Chr01-68802161	1	68802161	554905	3.46865	554905	1662
554906	554906	Chr01-68802186	1	68802186	554906	3.46865	554906	1663
637089	637089	Chr01-78918535	1	78918535	637089	3.46767	637089	1664
633866	633866	Chr01-78610540	1	78610540	633866	3.46614	633866	1665
17261	17261	Chr01-2175400	1	2175400	17261	3.46466	17261	1666
618181	618181	Chr01-76745576	1	76745576	618181	3.46318	618181	1667
77107	77107	Chr01-9929298	1	9929298	77107	3.46306	77107	1668
77108	77108	Chr01-9929300	1	9929300	77108	3.46306	77108	1669
77109	77109	Chr01-9929316	1	9929316	77109	3.46306	77109	1670
442861	442861	Chr01-58171820	1	58171820	442861	3.46164	442861	1671
62501	62501	Chr01-8018621	1	8018621	62501	3.46052	62501	1672
62502	62502	Chr01-8018636	1	8018636	62502	3.46052	62502	1673
535710	535710	Chr01-66686318	1	66686318	535710	3.45798	535710	1674
308632	308632	Chr01-38023340	1	38023340	308632	3.45784	308632	1675
604071	604071	Chr01-75056443	1	75056443	604071	3.45779	604071	1676
311211	311211	Chr01-38448764	1	38448764	311211	3.45596	311211	1677
641238	641238	Chr01-79406913	1	79406913	641238	3.4546	641238	1678
468144	468144	Chr01-60208086	1	60208086	468144	3.45286	468144	1679
33388	33388	Chr01-4169362	1	4169362	33388	3.45276	33388	1680
650070	650070	Chr01-80251729	1	80251729	650070	3.45263	650070	1681
277850	277850	Chr01-32604673	1	32604673	277850	3.45029	277850	1682
495564	495564	Chr01-62643087	1	62643087	495564	3.44926	495564	1683
605184	605184	Chr01-75144599	1	75144599	605184	3.44917	605184	1684
22944	22944	Chr01-3016994	1	3016994	22944	3.44906	22944	1685
118874	118874	Chr01-14450368	1	14450368	118874	3.44898	118874	1686
551531	551531	Chr01-68394380	1	68394380	551531	3.44878	551531	1687
551534	551534	Chr01-68394407	1	68394407	551534	3.44878	551534	1688
62584	62584	Chr01-8021238	1	8021238	62584	3.44654	62584	1689
572774	572774	Chr01-71695717	1	71695717	572774	3.4464	572774	1690
94464	94464	Chr01-11642467	1	11642467	94464	3.44525	94464	1691
94475	94475	Chr01-11643277	1	11643277	94475	3.44525	94475	1692
94486	94486	Chr01-11644841	1	11644841	94486	3.44525	94486	1693
94495	94495	Chr01-11645189	1	11645189	94495	3.44525	94495	1694
94503	94503	Chr01-11649509	1	11649509	94503	3.44525	94503	1695
94506	94506	Chr01-11650325	1	11650325	94506	3.44525	94506	1696
94510	94510	Chr01-11653273	1	11653273	94510	3.44525	94510	1697
94515	94515	Chr01-11654441	1	11654441	94515	3.44525	94515	1698
94538	94538	Chr01-11657424	1	11657424	94538	3.44525	94538	1699
94541	94541	Chr01-11658024	1	11658024	94541	3.44525	94541	1700
94549	94549	Chr01-11660450	1	11660450	94549	3.44525	94549	1701
94554	94554	Chr01-11662648	1	11662648	94554	3.44525	94554	1702
94622	94622	Chr01-11670007	1	11670007	94622	3.44525	94622	1703
94624	94624	Chr01-11670113	1	11670113	94624	3.44525	94624	1704
94625	94625	Chr01-11670130	1	11670130	94625	3.44525	94625	1705
94626	94626	Chr01-11670136	1	11670136	94626	3.44525	94626	1706
94629	94629	Chr01-11670290	1	11670290	94629	3.44525	94629	1707
94753	94753	Chr01-11679787	1	11679787	94753	3.44525	94753	1708
94833	94833	Chr01-11687627	1	11687627	94833	3.44525	94833	1709
94838	94838	Chr01-11687999	1	11687999	94838	3.44525	94838	1710
63410	63410	Chr01-8104586	1	8104586	63410	3.44464	63410	1711
612022	612022	Chr01-75861019	1	75861019	612022	3.44408	612022	1712
17627	17627	Chr01-2257455	1	2257455	17627	3.44403	17627	1713
283103	283103	Chr01-33757628	1	33757628	283103	3.4419	283103	1714
565308	565308	Chr01-70580778	1	70580778	565308	3.44077	565308	1715
565309	565309	Chr01-70580819	1	70580819	565309	3.44077	565309	1716
565310	565310	Chr01-70580822	1	70580822	565310	3.44077	565310	1717
565314	565314	Chr01-70581161	1	70581161	565314	3.44077	565314	1718
565316	565316	Chr01-70581187	1	70581187	565316	3.44077	565316	1719
565323	565323	Chr01-70581592	1	70581592	565323	3.44077	565323	1720
565324	565324	Chr01-70581609	1	70581609	565324	3.44077	565324	1721
565325	565325	Chr01-70581616	1	70581616	565325	3.44077	565325	1722
565326	565326	Chr01-70581626	1	70581626	565326	3.44077	565326	1723
565357	565357	Chr01-70581986	1	70581986	565357	3.44077	565357	1724
565358	565358	Chr01-70582014	1	70582014	565358	3.44077	565358	1725
565359	565359	Chr01-70582167	1	70582167	565359	3.44077	565359	1726
565360	565360	Chr01-70582247	1	70582247	565360	3.44077	565360	1727
565361	565361	Chr01-70582253	1	70582253	565361	3.44077	565361	1728
565362	565362	Chr01-70582292	1	70582292	565362	3.44077	565362	1729
565363	565363	Chr01-70582314	1	70582314	565363	3.44077	565363	1730
565364	565364	Chr01-70582315	1	70582315	565364	3.44077	565364	1731
565365	565365	Chr01-70582335	1	70582335	565365	3.44077	565365	1732
565367	565367	Chr01-70582368	1	70582368	565367	3.44077	565367	1733
565368	565368	Chr01-70582451	1	70582451	565368	3.44077	565368	1734
565369	565369	Chr01-70582472	1	70582472	565369	3.44077	565369	1735
565370	565370	Chr01-70582481	1	70582481	565370	3.44077	565370	1736
565371	565371	Chr01-70582539	1	70582539	565371	3.44077	565371	1737
565373	565373	Chr01-70582576	1	70582576	565373	3.44077	565373	1738
565374	565374	Chr01-70582631	1	70582631	565374	3.44077	565374	1739
565375	565375	Chr01-70582709	1	70582709	565375	3.44077	565375	1740
565376	565376	Chr01-70582722	1	70582722	565376	3.44077	565376	1741
565380	565380	Chr01-70582856	1	70582856	565380	3.44077	565380	1742
565381	565381	Chr01-70582875	1	70582875	565381	3.44077	565381	1743
565382	565382	Chr01-70582890	1	70582890	565382	3.44077	565382	1744
565391	565391	Chr01-70583174	1	70583174	565391	3.44077	565391	1745
565399	565399	Chr01-70583596	1	70583596	565399	3.44077	565399	1746
565400	565400	Chr01-70583620	1	70583620	565400	3.44077	565400	1747
565401	565401	Chr01-70583623	1	70583623	565401	3.44077	565401	1748
565403	565403	Chr01-70583680	1	70583680	565403	3.44077	565403	1749
565405	565405	Chr01-70584053	1	70584053	565405	3.44077	565405	1750
565406	565406	Chr01-70584080	1	70584080	565406	3.44077	565406	1751
565407	565407	Chr01-70584183	1	70584183	565407	3.44077	565407	1752
565408	565408	Chr01-70584230	1	70584230	565408	3.44077	565408	1753
565409	565409	Chr01-70584240	1	70584240	565409	3.44077	565409	1754
565410	565410	Chr01-70584279	1	70584279	565410	3.44077	565410	1755
565412	565412	Chr01-70584586	1	70584586	565412	3.44077	565412	1756
565414	565414	Chr01-70584847	1	70584847	565414	3.44077	565414	1757
565415	565415	Chr01-70584872	1	70584872	565415	3.44077	565415	1758
565416	565416	Chr01-70585073	1	70585073	565416	3.44077	565416	1759
565417	565417	Chr01-70585079	1	70585079	565417	3.44077	565417	1760
565418	565418	Chr01-70585118	1	70585118	565418	3.44077	565418	1761
565420	565420	Chr01-70585216	1	70585216	565420	3.44077	565420	1762
565421	565421	Chr01-70585224	1	70585224	565421	3.44077	565421	1763
565422	565422	Chr01-70585226	1	70585226	565422	3.44077	565422	1764
565423	565423	Chr01-70585227	1	70585227	565423	3.44077	565423	1765
565427	565427	Chr01-70585511	1	70585511	565427	3.44077	565427	1766
565428	565428	Chr01-70585523	1	70585523	565428	3.44077	565428	1767
565429	565429	Chr01-70585592	1	70585592	565429	3.44077	565429	1768
565430	565430	Chr01-70585613	1	70585613	565430	3.44077	565430	1769
565432	565432	Chr01-70585959	1	70585959	565432	3.44077	565432	1770
565433	565433	Chr01-70586079	1	70586079	565433	3.44077	565433	1771
565434	565434	Chr01-70586102	1	70586102	565434	3.44077	565434	1772
565435	565435	Chr01-70586281	1	70586281	565435	3.44077	565435	1773
565436	565436	Chr01-70586295	1	70586295	565436	3.44077	565436	1774
565437	565437	Chr01-70586318	1	70586318	565437	3.44077	565437	1775
339929	339929	Chr01-47978399	1	47978399	339929	3.43972	339929	1776
160067	160067	Chr01-18717322	1	18717322	160067	3.43947	160067	1777
571070	571070	Chr01-71514519	1	71514519	571070	3.43848	571070	1778
571071	571071	Chr01-71514522	1	71514522	571071	3.43848	571071	1779
344424	344424	Chr01-48500432	1	48500432	344424	3.43844	344424	1780
156707	156707	Chr01-18366854	1	18366854	156707	3.43757	156707	1781
605031	605031	Chr01-75132896	1	75132896	605031	3.43676	605031	1782
113314	113314	Chr01-13826425	1	13826425	113314	3.43591	113314	1783
118875	118875	Chr01-14450388	1	14450388	118875	3.43547	118875	1784
337268	337268	Chr01-47736721	1	47736721	337268	3.43404	337268	1785
48555	48555	Chr01-6457373	1	6457373	48555	3.4329	48555	1786
160063	160063	Chr01-18717240	1	18717240	160063	3.43158	160063	1787
599106	599106	Chr01-74483534	1	74483534	599106	3.43117	599106	1788
72654	72654	Chr01-9505423	1	9505423	72654	3.43026	72654	1789
470191	470191	Chr01-60575426	1	60575426	470191	3.42724	470191	1790
279934	279934	Chr01-33138422	1	33138422	279934	3.42724	279934	1791
640977	640977	Chr01-79396010	1	79396010	640977	3.42597	640977	1792
92947	92947	Chr01-11464263	1	11464263	92947	3.42506	92947	1793
298531	298531	Chr01-36128020	1	36128020	298531	3.42417	298531	1794
298532	298532	Chr01-36128037	1	36128037	298532	3.42417	298532	1795
269852	269852	Chr01-31200915	1	31200915	269852	3.42332	269852	1796
33433	33433	Chr01-4181007	1	4181007	33433	3.42136	33433	1797
160073	160073	Chr01-18718011	1	18718011	160073	3.42079	160073	1798
160074	160074	Chr01-18718080	1	18718080	160074	3.42079	160074	1799
160076	160076	Chr01-18718139	1	18718139	160076	3.42079	160076	1800
160084	160084	Chr01-18718374	1	18718374	160084	3.42079	160084	1801
160085	160085	Chr01-18718416	1	18718416	160085	3.42079	160085	1802
565334	565334	Chr01-70581704	1	70581704	565334	3.41937	565334	1803
565404	565404	Chr01-70583840	1	70583840	565404	3.41864	565404	1804
337415	337415	Chr01-47769957	1	47769957	337415	3.4183	337415	1805
565299	565299	Chr01-70580607	1	70580607	565299	3.41757	565299	1806
565383	565383	Chr01-70582959	1	70582959	565383	3.41757	565383	1807
551344	551344	Chr01-68385351	1	68385351	551344	3.41726	551344	1808
551510	551510	Chr01-68393958	1	68393958	551510	3.41726	551510	1809
551535	551535	Chr01-68394543	1	68394543	551535	3.41726	551535	1810
551546	551546	Chr01-68394679	1	68394679	551546	3.41726	551546	1811
551547	551547	Chr01-68394693	1	68394693	551547	3.41726	551547	1812
551568	551568	Chr01-68395148	1	68395148	551568	3.41726	551568	1813
272565	272565	Chr01-31756158	1	31756158	272565	3.41691	272565	1814
33393	33393	Chr01-4175752	1	4175752	33393	3.41682	33393	1815
62610	62610	Chr01-8022365	1	8022365	62610	3.41622	62610	1816
600298	600298	Chr01-74585219	1	74585219	600298	3.41549	600298	1817
550470	550470	Chr01-68310725	1	68310725	550470	3.41454	550470	1818
550471	550471	Chr01-68310759	1	68310759	550471	3.41454	550471	1819
550472	550472	Chr01-68310761	1	68310761	550472	3.41454	550472	1820
72189	72189	Chr01-9401856	1	9401856	72189	3.41435	72189	1821
568619	568619	Chr01-71210254	1	71210254	568619	3.41179	568619	1822
650177	650177	Chr01-80266926	1	80266926	650177	3.40894	650177	1823
474699	474699	Chr01-60859762	1	60859762	474699	3.40326	474699	1824
630752	630752	Chr01-78322901	1	78322901	630752	3.40313	630752	1825
630770	630770	Chr01-78324291	1	78324291	630770	3.40313	630770	1826
256574	256574	Chr01-29959350	1	29959350	256574	3.40172	256574	1827
612656	612656	Chr01-75963871	1	75963871	612656	3.40093	612656	1828
565236	565236	Chr01-70565069	1	70565069	565236	3.39672	565236	1829
565238	565238	Chr01-70565472	1	70565472	565238	3.39672	565238	1830
565248	565248	Chr01-70567844	1	70567844	565248	3.39672	565248	1831
565250	565250	Chr01-70568017	1	70568017	565250	3.39672	565250	1832
565252	565252	Chr01-70568442	1	70568442	565252	3.39672	565252	1833
565254	565254	Chr01-70569129	1	70569129	565254	3.39672	565254	1834
565258	565258	Chr01-70570739	1	70570739	565258	3.39672	565258	1835
565291	565291	Chr01-70578251	1	70578251	565291	3.39672	565291	1836
565372	565372	Chr01-70582559	1	70582559	565372	3.39672	565372	1837
527853	527853	Chr01-65788596	1	65788596	527853	3.39637	527853	1838
617872	617872	Chr01-76710208	1	76710208	617872	3.39606	617872	1839
495993	495993	Chr01-62682224	1	62682224	495993	3.39596	495993	1840
94946	94946	Chr01-11696208	1	11696208	94946	3.39504	94946	1841
118830	118830	Chr01-14449565	1	14449565	118830	3.39475	118830	1842
118833	118833	Chr01-14449647	1	14449647	118833	3.39475	118833	1843
285866	285866	Chr01-34103474	1	34103474	285866	3.39361	285866	1844
285897	285897	Chr01-34106310	1	34106310	285897	3.39361	285897	1845
285898	285898	Chr01-34106314	1	34106314	285898	3.39361	285898	1846
285899	285899	Chr01-34106315	1	34106315	285899	3.39361	285899	1847
285916	285916	Chr01-34107674	1	34107674	285916	3.39361	285916	1848
286525	286525	Chr01-34166701	1	34166701	286525	3.39361	286525	1849
287418	287418	Chr01-34273287	1	34273287	287418	3.39361	287418	1850
495908	495908	Chr01-62664407	1	62664407	495908	3.39286	495908	1851
524441	524441	Chr01-65211511	1	65211511	524441	3.38874	524441	1852
187701	187701	Chr01-21789947	1	21789947	187701	3.38532	187701	1853
330656	330656	Chr01-46807303	1	46807303	330656	3.37963	330656	1854
637910	637910	Chr01-79024269	1	79024269	637910	3.37865	637910	1855
554698	554698	Chr01-68785060	1	68785060	554698	3.37829	554698	1856
554699	554699	Chr01-68785071	1	68785071	554699	3.37829	554699	1857
554700	554700	Chr01-68785113	1	68785113	554700	3.37829	554700	1858
554701	554701	Chr01-68785133	1	68785133	554701	3.37829	554701	1859
554702	554702	Chr01-68785147	1	68785147	554702	3.37829	554702	1860
554711	554711	Chr01-68785352	1	68785352	554711	3.37829	554711	1861
554733	554733	Chr01-68786510	1	68786510	554733	3.37829	554733	1862
554734	554734	Chr01-68786517	1	68786517	554734	3.37829	554734	1863
554735	554735	Chr01-68786568	1	68786568	554735	3.37829	554735	1864
554736	554736	Chr01-68786585	1	68786585	554736	3.37829	554736	1865
554737	554737	Chr01-68786591	1	68786591	554737	3.37829	554737	1866
554738	554738	Chr01-68786637	1	68786637	554738	3.37829	554738	1867
554739	554739	Chr01-68786661	1	68786661	554739	3.37829	554739	1868
554783	554783	Chr01-68788069	1	68788069	554783	3.37829	554783	1869
554784	554784	Chr01-68788070	1	68788070	554784	3.37829	554784	1870
554785	554785	Chr01-68788091	1	68788091	554785	3.37829	554785	1871
554786	554786	Chr01-68788120	1	68788120	554786	3.37829	554786	1872
554787	554787	Chr01-68788123	1	68788123	554787	3.37829	554787	1873
554788	554788	Chr01-68788125	1	68788125	554788	3.37829	554788	1874
554789	554789	Chr01-68788136	1	68788136	554789	3.37829	554789	1875
554790	554790	Chr01-68788167	1	68788167	554790	3.37829	554790	1876
554791	554791	Chr01-68788174	1	68788174	554791	3.37829	554791	1877
137666	137666	Chr01-16553560	1	16553560	137666	3.37579	137666	1878
291668	291668	Chr01-34863981	1	34863981	291668	3.37339	291668	1879
630424	630424	Chr01-78284867	1	78284867	630424	3.37117	630424	1880
116104	116104	Chr01-14169828	1	14169828	116104	3.37117	116104	1881
2710	2710	Chr01-314440	1	314440	2710	3.36937	2710	1882
160054	160054	Chr01-18716296	1	18716296	160054	3.36594	160054	1883
335028	335028	Chr01-47423741	1	47423741	335028	3.36559	335028	1884
65304	65304	Chr01-8316804	1	8316804	65304	3.36403	65304	1885
65305	65305	Chr01-8316820	1	8316820	65305	3.36403	65305	1886
8947	8947	Chr01-1259687	1	1259687	8947	3.36314	8947	1887
8949	8949	Chr01-1259719	1	1259719	8949	3.36314	8949	1888
646746	646746	Chr01-79857148	1	79857148	646746	3.36303	646746	1889
554518	554518	Chr01-68775324	1	68775324	554518	3.36114	554518	1890
33997	33997	Chr01-4243923	1	4243923	33997	3.36109	33997	1891
3187	3187	Chr01-375404	1	375404	3187	3.36056	3187	1892
471486	471486	Chr01-60677985	1	60677985	471486	3.3599	471486	1893
484010	484010	Chr01-61722198	1	61722198	484010	3.35796	484010	1894
484011	484011	Chr01-61722209	1	61722209	484011	3.35796	484011	1895
484012	484012	Chr01-61722214	1	61722214	484012	3.35796	484012	1896
484038	484038	Chr01-61723052	1	61723052	484038	3.35796	484038	1897
462279	462279	Chr01-59727127	1	59727127	462279	3.35709	462279	1898
270690	270690	Chr01-31331239	1	31331239	270690	3.35478	270690	1899
390380	390380	Chr01-53192967	1	53192967	390380	3.35408	390380	1900
639053	639053	Chr01-79156034	1	79156034	639053	3.35263	639053	1901
639142	639142	Chr01-79160484	1	79160484	639142	3.35263	639142	1902
605192	605192	Chr01-75145738	1	75145738	605192	3.3492	605192	1903
605204	605204	Chr01-75147541	1	75147541	605204	3.3492	605204	1904
605205	605205	Chr01-75147659	1	75147659	605205	3.3492	605205	1905
482899	482899	Chr01-61643523	1	61643523	482899	3.34753	482899	1906
227642	227642	Chr01-27047956	1	27047956	227642	3.34738	227642	1907
521530	521530	Chr01-64966718	1	64966718	521530	3.34657	521530	1908
521601	521601	Chr01-64968229	1	64968229	521601	3.34657	521601	1909
521605	521605	Chr01-64968327	1	64968327	521605	3.34657	521605	1910
521616	521616	Chr01-64968620	1	64968620	521616	3.34657	521616	1911
645609	645609	Chr01-79739460	1	79739460	645609	3.34624	645609	1912
31495	31495	Chr01-3980876	1	3980876	31495	3.34604	31495	1913
31812	31812	Chr01-4010399	1	4010399	31812	3.34604	31812	1914
31822	31822	Chr01-4010774	1	4010774	31822	3.34604	31822	1915
521489	521489	Chr01-64965377	1	64965377	521489	3.34195	521489	1916
565264	565264	Chr01-70571182	1	70571182	565264	3.34083	565264	1917
565265	565265	Chr01-70571183	1	70571183	565265	3.34083	565265	1918
315254	315254	Chr01-39101173	1	39101173	315254	3.34027	315254	1919
643387	643387	Chr01-79573362	1	79573362	643387	3.34001	643387	1920
442771	442771	Chr01-58168606	1	58168606	442771	3.33992	442771	1921
543148	543148	Chr01-67458684	1	67458684	543148	3.33699	543148	1922
543167	543167	Chr01-67459931	1	67459931	543167	3.33699	543167	1923
341723	341723	Chr01-48142550	1	48142550	341723	3.33642	341723	1924
268270	268270	Chr01-31013215	1	31013215	268270	3.33508	268270	1925
540004	540004	Chr01-67150749	1	67150749	540004	3.33386	540004	1926
540005	540005	Chr01-67150759	1	67150759	540005	3.33386	540005	1927
31636	31636	Chr01-3994339	1	3994339	31636	3.33374	31636	1928
61624	61624	Chr01-7899273	1	7899273	61624	3.33347	61624	1929
62069	62069	Chr01-7966499	1	7966499	62069	3.33347	62069	1930
550463	550463	Chr01-68310577	1	68310577	550463	3.33	550463	1931
597412	597412	Chr01-74305021	1	74305021	597412	3.32924	597412	1932
521289	521289	Chr01-64953666	1	64953666	521289	3.32915	521289	1933
64999	64999	Chr01-8251609	1	8251609	64999	3.32899	64999	1934
638562	638562	Chr01-79115773	1	79115773	638562	3.32692	638562	1935
638563	638563	Chr01-79115776	1	79115776	638563	3.32692	638563	1936
92948	92948	Chr01-11464297	1	11464297	92948	3.32607	92948	1937
145882	145882	Chr01-17310155	1	17310155	145882	3.32538	145882	1938
146150	146150	Chr01-17342729	1	17342729	146150	3.32538	146150	1939
73044	73044	Chr01-9558016	1	9558016	73044	3.32535	73044	1940
434921	434921	Chr01-57507977	1	57507977	434921	3.32497	434921	1941
496365	496365	Chr01-62718928	1	62718928	496365	3.32293	496365	1942
496367	496367	Chr01-62718930	1	62718930	496367	3.32293	496367	1943
496368	496368	Chr01-62718950	1	62718950	496368	3.32293	496368	1944
496369	496369	Chr01-62718973	1	62718973	496369	3.32293	496369	1945
496370	496370	Chr01-62718974	1	62718974	496370	3.32293	496370	1946
33809	33809	Chr01-4223060	1	4223060	33809	3.32247	33809	1947
639122	639122	Chr01-79159620	1	79159620	639122	3.32232	639122	1948
550330	550330	Chr01-68306213	1	68306213	550330	3.32169	550330	1949
550340	550340	Chr01-68306367	1	68306367	550340	3.32169	550340	1950
550405	550405	Chr01-68308614	1	68308614	550405	3.32169	550405	1951
550453	550453	Chr01-68309879	1	68309879	550453	3.32169	550453	1952
550454	550454	Chr01-68309915	1	68309915	550454	3.32169	550454	1953
550455	550455	Chr01-68309931	1	68309931	550455	3.32169	550455	1954
550456	550456	Chr01-68309932	1	68309932	550456	3.32169	550456	1955
34340	34340	Chr01-4297972	1	4297972	34340	3.31987	34340	1956
72651	72651	Chr01-9505036	1	9505036	72651	3.31824	72651	1957
77493	77493	Chr01-9965407	1	9965407	77493	3.31787	77493	1958
94480	94480	Chr01-11644050	1	11644050	94480	3.31786	94480	1959
94505	94505	Chr01-11650163	1	11650163	94505	3.31786	94505	1960
94509	94509	Chr01-11653254	1	11653254	94509	3.31786	94509	1961
91371	91371	Chr01-11304511	1	11304511	91371	3.31739	91371	1962
554931	554931	Chr01-68803515	1	68803515	554931	3.31722	554931	1963
268258	268258	Chr01-31012947	1	31012947	268258	3.3165	268258	1964
366316	366316	Chr01-50458774	1	50458774	366316	3.31597	366316	1965
72803	72803	Chr01-9523810	1	9523810	72803	3.3148	72803	1966
442755	442755	Chr01-58168441	1	58168441	442755	3.31311	442755	1967
215348	215348	Chr01-25751252	1	25751252	215348	3.31302	215348	1968
72839	72839	Chr01-9535433	1	9535433	72839	3.3123	72839	1969
31917	31917	Chr01-4031876	1	4031876	31917	3.31176	31917	1970
123782	123782	Chr01-15015315	1	15015315	123782	3.3117	123782	1971
123783	123783	Chr01-15015318	1	15015318	123783	3.3117	123783	1972
123784	123784	Chr01-15015328	1	15015328	123784	3.3117	123784	1973
123786	123786	Chr01-15015362	1	15015362	123786	3.3117	123786	1974
123787	123787	Chr01-15015363	1	15015363	123787	3.3117	123787	1975
123788	123788	Chr01-15015404	1	15015404	123788	3.3117	123788	1976
61979	61979	Chr01-7960197	1	7960197	61979	3.31125	61979	1977
61980	61980	Chr01-7960215	1	7960215	61980	3.31125	61980	1978
61981	61981	Chr01-7960217	1	7960217	61981	3.31125	61981	1979
173671	173671	Chr01-20140264	1	20140264	173671	3.31122	173671	1980
287174	287174	Chr01-34244390	1	34244390	287174	3.31115	287174	1981
495534	495534	Chr01-62640828	1	62640828	495534	3.31115	495534	1982
495540	495540	Chr01-62641334	1	62641334	495540	3.31115	495540	1983
565320	565320	Chr01-70581499	1	70581499	565320	3.31102	565320	1984
565322	565322	Chr01-70581545	1	70581545	565322	3.31102	565322	1985
565327	565327	Chr01-70581661	1	70581661	565327	3.31102	565327	1986
565440	565440	Chr01-70586561	1	70586561	565440	3.31102	565440	1987
565441	565441	Chr01-70586578	1	70586578	565441	3.31102	565441	1988
565442	565442	Chr01-70586596	1	70586596	565442	3.31102	565442	1989
565443	565443	Chr01-70586634	1	70586634	565443	3.31102	565443	1990
565444	565444	Chr01-70586638	1	70586638	565444	3.31102	565444	1991
565453	565453	Chr01-70586761	1	70586761	565453	3.31102	565453	1992
565454	565454	Chr01-70586764	1	70586764	565454	3.31102	565454	1993
64995	64995	Chr01-8251542	1	8251542	64995	3.31049	64995	1994
64996	64996	Chr01-8251547	1	8251547	64996	3.31049	64996	1995
64997	64997	Chr01-8251556	1	8251556	64997	3.31049	64997	1996
64998	64998	Chr01-8251562	1	8251562	64998	3.31049	64998	1997
641391	641391	Chr01-79424639	1	79424639	641391	3.31043	641391	1998
650090	650090	Chr01-80256286	1	80256286	650090	3.31021	650090	1999
[truncated: 110,533 more rows]

## Sheet: Table S7
S Table 7: Summary of putative candidate genes with their corressponsingg SNPs.
	Chromosome: position	Candidate gene	Orthologous Gene	References
	Chr01: 67433181	Sobic.001G386700	Homeodomain-like superfamily protein, simillar to zink finger (within-210 kb)	Enyew wt al., 2022
	Chr01: 68397744	Sobic.001G398100	Y1 (MYB transcription factor)	Nida et al., 2019
	Chr02: 71718582	Sobic.002G353800	Homeobox domain containing protein, expressed	Prom et al., 2021
	Chr06: 48838810	Sobic.006G122200	Cellulase enzyme coding	Brenton et al., 2016
	Chr09: 57040002	Sobic.009G229800	Dw1 (dwarfing-1 locus)	Brown et al., 2008; Klein et al., 2008
	Chr06: 42867057	Sobic.006G067700	Dw2 (dwarfing-2 locus) close (~60 kb)	Higgins et al., 2014; Burrell et al., 2015
	Chr09: 58569186	Sobic.009G250600	F-box proteins	Habyarimana et al., 2020
	Chr09: 57597290	Sobic.009G237900	Dry mass yield (DMY-locus)	Habyarimana et al., 2020

## Sheet: Gene_Information
SNP_GROUP	Chromosome	SNP_Position	NUM_SNPs	GENE_ID	GENE_Start	GENE_End	GeneINFO: Seed Color
1-68367032	1	68367032	1	Sobic.001G397900	68362757	68367370	Sobic.001G397900.1.p,PF00249,PF06640,PTHR10641,PTHR10641:SF203,K09422,AT2G47460.1,ATMYB12,MYB12,PFG1,myb,domain,protein,12,LOC_Os03g19120.1,MYB,family,transcription,factor,,putative,,expressed
1-68397744	1	68397744	1	Sobic.001G398100	68399401	68400602	Sobic.001G398100.1.p,PF00249,PF06640,PTHR10641,PTHR10641:SF203,AT2G47460.1,ATMYB12,MYB12,PFG1,myb,domain,protein,12,LOC_Os03g19120.1,MYB,family,transcription,factor,,putative,,expressed
1-68399303	1	68399303	1	Sobic.001G398100	68399401	68400602	Sobic.001G398100.1.p,PF00249,PF06640,PTHR10641,PTHR10641:SF203,AT2G47460.1,ATMYB12,MYB12,PFG1,myb,domain,protein,12,LOC_Os03g19120.1,MYB,family,transcription,factor,,putative,,expressed
1-68400490	1	68400490	1	Sobic.001G398100	68399401	68400602	Sobic.001G398100.1.p,PF00249,PF06640,PTHR10641,PTHR10641:SF203,AT2G47460.1,ATMYB12,MYB12,PFG1,myb,domain,protein,12,LOC_Os03g19120.1,MYB,family,transcription,factor,,putative,,expressed
1-68401660	1	68401660	1	Sobic.001G398100	68399401	68400602	Sobic.001G398100.1.p,PF00249,PF06640,PTHR10641,PTHR10641:SF203,AT2G47460.1,ATMYB12,MYB12,PFG1,myb,domain,protein,12,LOC_Os03g19120.1,MYB,family,transcription,factor,,putative,,expressed
SNP_GROUP	Chromosome	SNP_Position	NUM_SNPs	GENE_ID	GENE_Start	GENE_End	GeneINFO: Maturity
6-40263069	6	40263069	1	Sobic.006G057500	40269765	40270655	Sobic.006G057500.1.p,PF00685,PTHR11783,PTHR11783:SF85,2.8.2.25,GO:0008146,AT1G18590.1,ATSOT17,ATST5C,SOT17,sulfotransferase,17,LOC_Os12g17160.1,flavonol,sulfotransferase,,putative,,expressed
6-40491020	6	40491020	1	Sobic.006G058500	40486342	40489000	Sobic.006G058500.1.p,PF15630,PTHR22980,PTHR22980:SF0,AT5G50930.1,Histone,superfamily,protein,LOC_Os04g32600.1,expressed,protein
6-40492228	6	40492228	1	Sobic.006G058500	40486342	40489000	Sobic.006G058500.1.p,PF15630,PTHR22980,PTHR22980:SF0,AT5G50930.1,Histone,superfamily,protein,LOC_Os04g32600.1,expressed,protein
6-40492264	6	40492264	1	Sobic.006G058500	40486342	40489000	Sobic.006G058500.1.p,PF15630,PTHR22980,PTHR22980:SF0,AT5G50930.1,Histone,superfamily,protein,LOC_Os04g32600.1,expressed,protein
6-40492351	6	40492351	1	Sobic.006G058500	40486342	40489000	Sobic.006G058500.1.p,PF15630,PTHR22980,PTHR22980:SF0,AT5G50930.1,Histone,superfamily,protein,LOC_Os04g32600.1,expressed,protein
6-40492968	6	40492968	1	Sobic.006G058500	40486342	40489000	Sobic.006G058500.1.p,PF15630,PTHR22980,PTHR22980:SF0,AT5G50930.1,Histone,superfamily,protein,LOC_Os04g32600.1,expressed,protein
6-40493218	6	40493218	1	Sobic.006G058500	40486342	40489000	Sobic.006G058500.1.p,PF15630,PTHR22980,PTHR22980:SF0,AT5G50930.1,Histone,superfamily,protein,LOC_Os04g32600.1,expressed,protein
6-40493983	6	40493983	1	Sobic.006G058500	40486342	40489000	Sobic.006G058500.1.p,PF15630,PTHR22980,PTHR22980:SF0,AT5G50930.1,Histone,superfamily,protein,LOC_Os04g32600.1,expressed,protein
6-41098789	6	41098789	1	Sobic.006G060100	41089964	41092654	Sobic.006G060100.5.p,PTHR10168,PTHR10168:SF95,K17479,AT5G58530.1,Glutaredoxin,family,protein,LOC_Os05g39450.1,glutaredoxin,,putative,,expressed
6-41098789	6	41098789	1	Sobic.006G060200	41105367	41108206	Sobic.006G060200.3.p,PTHR22814,PTHR22814:SF119,KOG1603,AT3G02960.1,Heavy,metal,transport/detoxification,superfamily,protein,LOC_Os04g32810.1,expressed,protein
SNP_GROUP	Chromosome	SNP_Position	NUM_SNPs	GENE_ID	GENE_Start	GENE_End	GeneINFO: Plant Height
6-43381199	6	43381199	1	Sobic.006G071628	43367068	43375291	Sobic.006G071628.1.p,PF04810,PF08033,PF04815,PF04811,PTHR13803,PTHR13803:SF10,KOG1985,GO:0030127,GO:0008270,GO:0006888,GO:0006886,AT2G27460.1,sec23/sec24,transport,family,protein,LOC_Os04g33690.1,sec23/Sec24,trunk,domain,containing,protein,,expressed
6-43381199	6	43381199	1	Sobic.006G071628	43367068	43375291	Sobic.006G071628.2.p,PF04810,PF08033,PF04815,PF04811,PTHR13803,PTHR13803:SF10,KOG1985,GO:0030127,GO:0008270,GO:0006888,GO:0006886,AT2G27460.1,sec23/sec24,transport,family,protein,LOC_Os04g33690.1,sec23/Sec24,trunk,domain,containing,protein,,expressed
6-43381199	6	43381199	1	Sobic.006G071628	43367068	43375291	Sobic.006G071628.3.p,PF08033,PF04815,PF04811,PTHR13803,PTHR13803:SF10,GO:0030127,GO:0006888,GO:0006886,AT2G27460.1,sec23/sec24,transport,family,protein,LOC_Os04g33690.1,sec23/Sec24,trunk,domain,containing,protein,,expressed
6-43381199	6	43381199	1	Sobic.006G072000	43382689	43386301	Sobic.006G072000.1.p,PF12706,PTHR12553,PTHR12553:SF47,AT1G30300.1,Metallo-hydrolase/oxidoreductase,superfamily,protein,LOC_Os03g44140.1,OsWAK26,-,OsWAK,receptor-like,protein,kinase,,expressed
9-57040002	9	57040002	1	Sobic.009G229700	57032871	57036097	Sobic.009G229700.1.p,PF03244,PTHR34787,PTHR34787:SF1,K02695,GO:0015979,GO:0009538,GO:0009522,AT1G52230.1,PSAH-2,PSAH2,PSI-H,photosystem,I,subunit,H2,LOC_Os05g48630.2,expressed,protein
9-57040002	9	57040002	1	Sobic.009G229900	57042535	57045813	Sobic.009G229900.1.p,PF03759,PTHR33101,PTHR33101:SF3,GO:0005089,AT3G24620.1,ATROPGEF8,ROPGEF8,RHO,guanyl-nucleotide,exchange,factor,8,LOC_Os05g48640.1,ATROPGEF7/ROPGEF7,,putative,,expressed
9-57064419	9	57064419	1	Sobic.009G230400	57058073	57060459	Sobic.009G230400.4.p,PF00201,PTHR11926,PTHR11926:SF252,2.4.1.202,GO:0016758,GO:0008152,AT3G55700.1,UDP-Glycosyltransferase,superfamily,protein,LOC_Os11g25454.1,cytokinin-N-glucosyltransferase,1,,putative,,expressed
9-57064419	9	57064419	1	Sobic.009G230500	57061616	57065103	Sobic.009G230500.2.p,PF12937,PF01167,PTHR16517,PTHR16517:SF35,KOG2502,GO:0005515,AT1G53320.1,AtTLP7,TLP7,tubby,like,protein,7,LOC_Os05g48670.1,OsFBT10,-,F-box,and,tubby,domain,containing,protein,,expressed
9-57064419	9	57064419	1	Sobic.009G230500	57061616	57065103	Sobic.009G230500.3.p,PF12937,PF01167,PTHR16517,PTHR16517:SF35,KOG2502,GO:0005515,AT1G53320.1,AtTLP7,TLP7,tubby,like,protein,7,LOC_Os05g48670.1,OsFBT10,-,F-box,and,tubby,domain,containing,protein,,expressed
9-57064426	9	57064426	1	Sobic.009G230400	57058073	57060459	Sobic.009G230400.3.p,PF00201,PTHR11926,PTHR11926:SF252,2.4.1.202,GO:0016758,GO:0008152,AT3G55700.1,UDP-Glycosyltransferase,superfamily,protein,LOC_Os11g25454.1,cytokinin-N-glucosyltransferase,1,,putative,,expressed
9-57064486	9	57064486	1	Sobic.009G230400	57058073	57060459	Sobic.009G230400.3.p,PF00201,PTHR11926,PTHR11926:SF252,2.4.1.202,GO:0016758,GO:0008152,AT3G55700.1,UDP-Glycosyltransferase,superfamily,protein,LOC_Os11g25454.1,cytokinin-N-glucosyltransferase,1,,putative,,expressed
9-57064714	9	57064714	1	Sobic.009G230400	57058073	57060459	Sobic.009G230400.4.p,PF00201,PTHR11926,PTHR11926:SF252,2.4.1.202,GO:0016758,GO:0008152,AT3G55700.1,UDP-Glycosyltransferase,superfamily,protein,LOC_Os11g25454.1,cytokinin-N-glucosyltransferase,1,,putative,,expressed
9-57064942	9	57064942	1	Sobic.009G230500	57061616	57065103	Sobic.009G230500.2.p,PF12937,PF01167,PTHR16517,PTHR16517:SF35,KOG2502,GO:0005515,AT1G53320.1,AtTLP7,TLP7,tubby,like,protein,7,LOC_Os05g48670.1,OsFBT10,-,F-box,and,tubby,domain,containing,protein,,expressed
9-57229656	9	57229656	1	Sobic.009G232266	57225567	57226701	Sobic.009G232266.1.p,PF00462,PTHR10168,PTHR10168:SF90,KOG1752,GO:0045454,GO:0015035,GO:0009055,AT1G28480.1,GRX480,roxy19,Thioredoxin,superfamily,protein,LOC_Os01g47760.1,OsGrx_I1,-,glutaredoxin,subgroup,III,,expressed
9-57611460	9	57611460	1	Sobic.009G237900	57601033	57602659	Sobic.009G237900.1.p,PF02298,PTHR33021,PTHR33021:SF46,GO:0009055,AT2G32300.1,UCC1,uclacyanin,1,LOC_Os05g49580.1,plastocyanin-like,domain,containing,protein,,putative,,expressed
SNP_GROUP	Chromosome	SNP_Position	NUM_SNPs	GENE_ID	GENE_Start	GENE_End	GeneINFO: Fresh weight
1-65630690	1	65630690	1	Sobic.001G367500	65619047	65623218	Sobic.001G367500.2.p,LOC_Os05g07030.1,arginyl-tRNA,synthetase,,putative,,expressed
2-77472104	2	77472104	1	Sobic.002G428301	77461635	77465163	Sobic.002G428301.1.p,PF03822,PTHR24347,PTHR24347:SF205,2.7.11.1,GO:0007165,AT5G45810.1,CIPK19,SnRK3.5,CBL-interacting,protein,kinase,19,LOC_Os07g48090.1,CAMK_KIN1/SNF1/Nim1_like.30,-,CAMK,includes,calcium/calmodulin,depedent,protein,kinases,,expressed
2-77472104	2	77472104	1	Sobic.002G428600	77476503	77477990	Sobic.002G428600.1.p,PF05050,PF08241,PTHR10108,PTHR10108:SF885,GO:0008168,GO:0008152,AT5G01710.1,methyltransferases,LOC_Os07g49210.1,helicase,conserved,C-terminal,domain,containing,protein,,expressed
2-77472104	2	77472104	1	Sobic.002G428700	77479048	77484586	Sobic.002G428700.1.p,PF00271,PF00176,PTHR10799,PTHR10799:SF660,KOG0390,3.6.4.12,K10875,GO:0005524,AT3G42670.1,CHR38,CLSY,chromatin,remodeling,38,LOC_Os07g49210.1,helicase,conserved,C-terminal,domain,containing,protein,,expressed
2-77614911	2	77614911	1	Sobic.002G430500	77610009	77614223	Sobic.002G430500.1.p,PF09279,PF00168,PF00387,PF00388,PTHR10336,PTHR10336:SF95,3.1.4.11,K05857,GO:0005515,GO:0035556,GO:0007165,GO:0006629,GO:0004435,AT3G08510.2,ATPLC2,PLC2,phospholipase,C,2,LOC_Os07g49330.1,phospholipase,C,,putative,,expressed
7-1414259	7	1414259	1	Sobic.007G016200	1400566	1405315	Sobic.007G016200.1.p,PF00931,PTHR23155,PTHR23155:SF601,GO:0043531,AT3G46730.1,NB-ARC,domain-containing,disease,resistance,protein,LOC_Os11g37050.1,expressed,protein
7-1414259	7	1414259	1	Sobic.007G016400	1417558	1421393	Sobic.007G016400.1.p,PF05631,PTHR23516,PTHR23516:SF2,KOG4332,GO:0016021,GO:0015689,GO:0015098,AT2G23093.1,Major,facilitator,superfamily,protein,LOC_Os08g02190.1,expressed,protein
9-59321818	9	59321818	1	Sobic.009G259800	59310988	59312409	Sobic.009G259800.1.p,PF13639,PTHR14155,PTHR14155:SF95,KOG1493,K10664,GO:0008270,GO:0005515,AT4G28890.1,RING/U-box,superfamily,protein,LOC_Os05g51780.1,zinc,finger,,C3HC4,type,domain,containing,protein,,expressed
9-59321818	9	59321818	1	Sobic.009G259900	59321024	59328186	Sobic.009G259900.1.p,PF16487,PF16488,PF08699,PF16486,PF02170,PF02171,PTHR22891,PTHR22891:SF20,K11593,GO:0005515,GO:0003676,AT2G27040.1,AGO4,OCP11,Argonaute,family,protein,LOC_Os04g06770.2,argonaute,,putative,,expressed
9-59321818	9	59321818	1	Sobic.009G260000	59328338	59330173	Sobic.009G260000.1.p,PF02453,PTHR10994,PTHR10994:SF65,KOG1792,AT3G19460.1,Reticulon,family,protein,LOC_Os04g29920.1,reticulon,domain,containing,protein,,putative,,expressed
SNP_GROUP	Chromosome	SNP_Position	NUM_SNPs	GENE_ID	GENE_Start	GENE_End	GeneINFO: Dry weight
1-48844844	1	48844844	1	Sobic.001G263900	48853471	48860836	Sobic.001G263900.1.p,PF00107,PF08240,PTHR11695,PTHR11695:SF597,1.1.1.1,K00001,GO:0055114,GO:0016491,GO:0008270,AT1G64710.1,GroES-like,zinc-binding,dehydrogenase,family,protein,LOC_Os10g07229.1,dehydrogenase,,putative,,expressed
2-2167922	2	2167922	1	Sobic.002G023500	2155903	2158671	Sobic.002G023500.1.p,PF04578,PF13968,PTHR31325,PTHR31325:SF26,AT5G45530.1,Protein,of,unknown,function,(DUF594),LOC_Os01g24240.1,expressed,protein
2-2167922	2	2167922	1	Sobic.002G023700	2173721	2176840	Sobic.002G023700.1.p,PF04578,PF13968,PTHR31325,PTHR31325:SF26,AT5G45530.1,Protein,of,unknown,function,(DUF594),LOC_Os01g24240.1,expressed,protein
2-2170724	2	2170724	1	Sobic.002G023600	2166990	2169738	Sobic.002G023600.1.p,LOC_Os09g21410.1,BED,zinc,finger,family,protein,,expressed
2-2171901	2	2171901	1	Sobic.002G023700	2173721	2176840	Sobic.002G023700.1.p,PF04578,PF13968,PTHR31325,PTHR31325:SF26,AT5G45530.1,Protein,of,unknown,function,(DUF594),LOC_Os01g24240.1,expressed,protein
2-2172979	2	2172979	1	Sobic.002G023700	2173721	2176840	Sobic.002G023700.1.p,PF04578,PF13968,PTHR31325,PTHR31325:SF26,AT5G45530.1,Protein,of,unknown,function,(DUF594),LOC_Os01g24240.1,expressed,protein
2-2173341	2	2173341	1	Sobic.002G023600	2166990	2169738	Sobic.002G023600.1.p,LOC_Os09g21410.1,BED,zinc,finger,family,protein,,expressed
2-2173341	2	2173341	1	Sobic.002G023700	2173721	2176840	Sobic.002G023700.1.p,PF04578,PF13968,PTHR31325,PTHR31325:SF26,AT5G45530.1,Protein,of,unknown,function,(DUF594),LOC_Os01g24240.1,expressed,protein
2-2177904	2	2177904	1	Sobic.002G023700	2173721	2176840	Sobic.002G023700.1.p,PF04578,PF13968,PTHR31325,PTHR31325:SF26,AT5G45530.1,Protein,of,unknown,function,(DUF594),LOC_Os01g24240.1,expressed,protein
2-2178092	2	2178092	1	Sobic.002G023600	2166990	2169738	Sobic.002G023600.1.p,LOC_Os09g21410.1,BED,zinc,finger,family,protein,,expressed
2-2178092	2	2178092	1	Sobic.002G023700	2173721	2176840	Sobic.002G023700.1.p,PF04578,PF13968,PTHR31325,PTHR31325:SF26,AT5G45530.1,Protein,of,unknown,function,(DUF594),LOC_Os01g24240.1,expressed,protein
2-2179349	2	2179349	1	Sobic.002G023700	2173721	2176840	Sobic.002G023700.1.p,PF04578,PF13968,PTHR31325,PTHR31325:SF26,AT5G45530.1,Protein,of,unknown,function,(DUF594),LOC_Os01g24240.1,expressed,protein
2-2179561	2	2179561	1	Sobic.002G023600	2166990	2169738	Sobic.002G023600.1.p,LOC_Os09g21410.1,BED,zinc,finger,family,protein,,expressed
2-2179679	2	2179679	1	Sobic.002G023700	2173721	2176840	Sobic.002G023700.1.p,PF04578,PF13968,PTHR31325,PTHR31325:SF26,AT5G45530.1,Protein,of,unknown,function,(DUF594),LOC_Os01g24240.1,expressed,protein
2-2179727	2	2179727	1	Sobic.002G023600	2166990	2169738	Sobic.002G023600.2.p,LOC_Os09g21410.1,BED,zinc,finger,family,protein,,expressed
2-2179727	2	2179727	1	Sobic.002G023700	2173721	2176840	Sobic.002G023700.1.p,PF04578,PF13968,PTHR31325,PTHR31325:SF26,AT5G45530.1,Protein,of,unknown,function,(DUF594),LOC_Os01g24240.1,expressed,protein
2-71718580	2	71718580	1	Sobic.002G353800	71707176	71708719	Sobic.002G353800.1.p,PF00046,PTHR24326,PTHR24326:SF157,K09338,GO:0003677,AT4G36740.1,ATHB40,HB-5,HB40,homeobox,protein,40,LOC_Os07g39320.1,homeobox,domain,containing,protein,,expressed
2-71718582	2	71718582	1	Sobic.002G353800	71707176	71708719	Sobic.002G353800.1.p,PF00046,PTHR24326,PTHR24326:SF157,K09338,GO:0003677,AT4G36740.1,ATHB40,HB-5,HB40,homeobox,protein,40,LOC_Os07g39320.1,homeobox,domain,containing,protein,,expressed (Biomass yield locus)
4-1805449	4	1805449	1	Sobic.004G022900	1812698	1815480	Sobic.004G022900.1.p,PTHR19328,PTHR19328:SF35,AT1G74790.1,catalytics,LOC_Os03g48540.1,expressed,protein
4-8971818	4	8971818	1	Sobic.004G100200	8958848	8964037	Sobic.004G100200.1.p,PF12799,PTHR24365,K17550,AT5G19680.1,Leucine-rich,repeat,(LRR),family,protein,LOC_Os02g13640.1,protein,phosphatase,1,regulatory,subunit,SDS22,,putative,,expressed
4-8971818	4	8971818	1	Sobic.004G100300	8964241	8965521	Sobic.004G100300.1.p,PF02298,PTHR33021,PTHR33021:SF16,GO:0009055,AT1G79800.1,AtENODL7,ENODL7,early,nodulin-like,protein,7,LOC_Os06g36010.1,plastocyanin-like,domain,containing,protein,,putative,,expressed
5-11446674	5	11446674	1	Sobic.005G084200	11449559	11449864	Sobic.005G084200.1.p,LOC_Os12g13960.1,LTPL33,-,Protease,inhibitor/seed,storage/LTP,family,protein,precursor,,expressed
5-36335859	5	36335859	1	Sobic.005G111200	36345636	36347251	Sobic.005G111200.1.p,PF00564,PTHR31066,PTHR31066:SF1,GO:0005515,AT3G26510.2,Octicosapeptide/Phox/Bem1p,family,protein,LOC_Os11g25780.1,PB1,domain,containing,protein,,expressed
5-59785398	5	59785398	1	Sobic.005G140900	59776411	59777700	Sobic.005G140900.1.p,PF00646,PTHR31790,PTHR31790:SF20,GO:0005515,AT2G41473.1,F-box,family,protein,LOC_Os07g13890.1,OsFBX230,-,F-box,domain,containing,protein,,expressed
5-60554738	5	60554738	1	Sobic.005G142400	60555899	60557981	Sobic.005G142400.1.p,PF03140,PTHR31549,PTHR31549:SF19,AT3G50170.1,Plant,protein,of,unknown,function,(DUF247),LOC_Os11g34090.1,plant,protein,of,unknown,function,domain,containing,protein,,expressed
7-57796532	7	57796532	1	Sobic.007G147600	57802860	57803738	Sobic.007G147600.1.p,PF02519,PTHR31374,PTHR31374:SF52,GO:0009733,AT5G20820.1,SAUR-like,auxin-responsive,protein,family,LOC_Os08g35110.1,OsSAUR33,-,Auxin-responsive,SAUR,gene,family,member,,expressed
8-11047014	8	11047014	1	Sobic.008G075350	11050058	11060673	Sobic.008G075350.1.p,LOC_Os04g10080.1,retrotransposon,,putative,,centromere-specific,,expressed
8-14251376	8	14251376	1	Sobic.008G080900	14257172	14258700	Sobic.008G080900.1.p,PF07939,PTHR31865,PTHR31865:SF0,AT2G31560.1,Protein,of,unknown,function,(DUF1685),LOC_Os12g12880.1,expressed,protein
9-13370672	9	13370672	1	Sobic.009G084300	13375078	13378493	Sobic.009G084300.1.p,PF01048,PTHR21234,PTHR21234:SF19,3.2.2.9,GO:0009116,GO:0003824,AT4G28940.1,Phosphorylase,superfamily,protein,LOC_Os05g13970.1,phosphorylase,domain,containing,protein,,putative,,expressed
10-50029692	10	50029692	1	Sobic.010G169600	50015617	50027342	Sobic.010G169600.1.p,PF14443,PTHR14304,PTHR14304:SF11,KOG4246,GO:0006355,AT2G03150.1,emb1579,ATP/GTP-binding,protein,family
10-50029692	10	50029692	1	Sobic.010G169700	50030092	50034543	Sobic.010G169700.1.p,PF03096,PTHR11034,PTHR11034:SF25,KOG2931,AT5G56750.1,NDL1,N-MYC,downregulated-like,1,LOC_Os06g36740.1,pollen-specific,protein,SF21,,putative,,expressed
10-50029692	10	50029692	1	Sobic.010G169700	50030092	50034543	Sobic.010G169700.2.p,PF03096,PTHR11034,PTHR11034:SF25,KOG2931,AT5G56750.1,NDL1,N-MYC,downregulated-like,1,LOC_Os06g36740.1,pollen-specific,protein,SF21,,putative,,expressed
SNP_GROUP	Chromosome	SNP_Position	NUM_SNPs	GENE_ID	GENE_Start	GENE_End	GeneINFO: Dry weight
6-43344671	6	43344671	1	Sobic.006G070830	43344453	43349422	Sobic.006G070830.1.p,PF08244,PF00251,PTHR31953,PTHR31953:SF3,3.2.1.26,K01193,AT3G52600.1,AtcwINV2,CWINV2,cell,wall,invertase,2,LOC_Os04g33740.1,glycosyl,hydrolases,,putative,,expressed
6-43346363	6	43346363	1	Sobic.006G070830	43344453	43349422	Sobic.006G070830.1.p,PF08244,PF00251,PTHR31953,PTHR31953:SF3,3.2.1.26,K01193,AT3G52600.1,AtcwINV2,CWINV2,cell,wall,invertase,2,LOC_Os04g33740.1,glycosyl,hydrolases,,putative,,expressed
6-43346363	6	43346363	1	Sobic.006G071096	43353433	43354267	Sobic.006G071096.1.p,PF11250,PTHR33155,PTHR33155:SF5,LOC_Os04g33710.1,expressed,protein
6-48838810	6	48838810	1	Sobic.006G122000	48831832	48833323	Sobic.006G122000.1.p,PF00067,PTHR24298:SF92,PTHR24298,KOG0156,1.14.13.121,GO:0005506,GO:0016705,GO:0020037,GO:0055114,AT3G48280.1,CYP71A25,cytochrome,P450,,family,71,,subfamily,A,,polypeptide,25,LOC_Os04g40470.1,cytochrome,P450,,putative,,expressed
6-48838810	6	48838810	1	Sobic.006G122100	48837026	48843664	Sobic.006G122100.1.p,PF14432,PF01535,PF13041,PTHR24015,PTHR24015:SF763,AT1G08070.1,OTP82,Tetratricopeptide,repeat,(TPR)-like,superfamily,protein,LOC_Os12g01850.1,pentatricopeptide,,putative,,expressed
8-5543404	8	5543404	1	Sobic.008G054700	5538316	5543758	Sobic.008G054700.3.p,PF10250,PTHR31288,PTHR31288:SF8,AT1G35510.1,O-fucosyltransferase,family,protein,LOC_Os12g07540.1,growth,regulator,related,protein,,putative,,expressed
8-5579104	8	5579104	1	Sobic.008G055100	5585342	5586152	Sobic.008G055100.1.p,PF03018,PTHR21495,PTHR21495:SF75,AT1G58170.1,Disease,resistance-responsive,(dirigent-like,protein),family,protein,LOC_Os12g07580.1,dirigent,,putative,,expressed
8-5586548	8	5586548	1	Sobic.008G055200	5592172	5593869	Sobic.008G055200.1.p,PF03018,PTHR21495,PTHR21495:SF75,AT1G58170.1,Disease,resistance-responsive,(dirigent-like,protein),family,protein,LOC_Os12g07580.1,dirigent,,putative,,expressed
8-5590194	8	5590194	1	Sobic.008G055100	5585342	5586152	Sobic.008G055100.1.p,PF03018,PTHR21495,PTHR21495:SF75,AT1G58170.1,Disease,resistance-responsive,(dirigent-like,protein),family,protein,LOC_Os12g07580.1,dirigent,,putative,,expressed
8-5591632	8	5591632	1	Sobic.008G055300	5601179	5604705	Sobic.008G055300.2.p,PF08660,PTHR12154,PTHR12154:SF4,KOG3339,K07441,AT4G18230.1,LOC_Os03g30934.5,UDP-N-acetylglucosamine,transferase,subunit,ALG14,,putative,,expressed
8-5591993	8	5591993	1	Sobic.008G055100	5585342	5586152	Sobic.008G055100.1.p,PF03018,PTHR21495,PTHR21495:SF75,AT1G58170.1,Disease,resistance-responsive,(dirigent-like,protein),family,protein,LOC_Os12g07580.1,dirigent,,putative,,expressed
8-5591993	8	5591993	1	Sobic.008G055300	5601179	5604705	Sobic.008G055300.2.p,PF08660,PTHR12154,PTHR12154:SF4,KOG3339,K07441,AT4G18230.1,LOC_Os03g30934.5,UDP-N-acetylglucosamine,transferase,subunit,ALG14,,putative,,expressed
8-5592801	8	5592801	1	Sobic.008G055100	5585342	5586152	Sobic.008G055100.1.p,PF03018,PTHR21495,PTHR21495:SF75,AT1G58170.1,Disease,resistance-responsive,(dirigent-like,protein),family,protein,LOC_Os12g07580.1,dirigent,,putative,,expressed
8-5592801	8	5592801	1	Sobic.008G055300	5601179	5604705	Sobic.008G055300.2.p,PF08660,PTHR12154,PTHR12154:SF4,KOG3339,K07441,AT4G18230.1,LOC_Os03g30934.5,UDP-N-acetylglucosamine,transferase,subunit,ALG14,,putative,,expressed
8-5592818	8	5592818	1	Sobic.008G055300	5601179	5604705	Sobic.008G055300.2.p,PF08660,PTHR12154,PTHR12154:SF4,KOG3339,K07441,AT4G18230.1,LOC_Os03g30934.5,UDP-N-acetylglucosamine,transferase,subunit,ALG14,,putative,,expressed
8-5592821	8	5592821	1	Sobic.008G055100	5585342	5586152	Sobic.008G055100.1.p,PF03018,PTHR21495,PTHR21495:SF75,AT1G58170.1,Disease,resistance-responsive,(dirigent-like,protein),family,protein,LOC_Os12g07580.1,dirigent,,putative,,expressed
8-5592821	8	5592821	1	Sobic.008G055300	5601179	5604705	Sobic.008G055300.2.p,PF08660,PTHR12154,PTHR12154:SF4,KOG3339,K07441,AT4G18230.1,LOC_Os03g30934.5,UDP-N-acetylglucosamine,transferase,subunit,ALG14,,putative,,expressed
8-5592880	8	5592880	1	Sobic.008G055200	5592172	5593869	Sobic.008G055200.1.p,PF03018,PTHR21495,PTHR21495:SF75,AT1G58170.1,Disease,resistance-responsive,(dirigent-like,protein),family,protein,LOC_Os12g07580.1,dirigent,,putative,,expressed
8-5593457	8	5593457	1	Sobic.008G055200	5592172	5593869	Sobic.008G055200.1.p,PF03018,PTHR21495,PTHR21495:SF75,AT1G58170.1,Disease,resistance-responsive,(dirigent-like,protein),family,protein,LOC_Os12g07580.1,dirigent,,putative,,expressed
8-5593463	8	5593463	1	Sobic.008G055100	5585342	5586152	Sobic.008G055100.1.p,PF03018,PTHR21495,PTHR21495:SF75,AT1G58170.1,Disease,resistance-responsive,(dirigent-like,protein),family,protein,LOC_Os12g07580.1,dirigent,,putative,,expressed
8-5593463	8	5593463	1	Sobic.008G055300	5601179	5604705	Sobic.008G055300.4.p,PF08660,PTHR12154,PTHR12154:SF4,KOG3339,AT4G18230.1,LOC_Os03g30934.1,UDP-N-acetylglucosamine,transferase,subunit,ALG14,,putative,,expressed
8-5637614	8	5637614	1	Sobic.008G055366	5637515	5637988	Sobic.008G055366.1.p,PF00102,PTHR19134,PTHR19134:SF317,3.1.3.48,GO:0006470,GO:0004725,AT1G71860.3,ATPTP1,PTP1,protein,tyrosine,phosphatase,1,LOC_Os12g07590.1,Protein-tyrosine,phosphatase,domain,containing,protein,,expressed
8-5637614	8	5637614	1	Sobic.008G055432	5638261	5641111	Sobic.008G055432.1.p,PF00069,PTHR27002,PTHR27002:SF65,2.7.11.1,GO:0006468,GO:0005524,GO:0004672,AT4G11490.1,CRK33,cysteine-rich,RLK,(RECEPTOR-like,protein,kinase),33,LOC_Os10g12620.1,protein,kinase,domain,containing,protein,,expressed
8-5637947	8	5637947	1	Sobic.008G055366	5637515	5637988	Sobic.008G055366.1.p,PF00102,PTHR19134,PTHR19134:SF317,3.1.3.48,GO:0006470,GO:0004725,AT1G71860.3,ATPTP1,PTP1,protein,tyrosine,phosphatase,1,LOC_Os12g07590.1,Protein-tyrosine,phosphatase,domain,containing,protein,,expressed
8-5637947	8	5637947	1	Sobic.008G055432	5638261	5641111	Sobic.008G055432.1.p,PF00069,PTHR27002,PTHR27002:SF65,2.7.11.1,GO:0006468,GO:0005524,GO:0004672,AT4G11490.1,CRK33,cysteine-rich,RLK,(RECEPTOR-like,protein,kinase),33,LOC_Os10g12620.1,protein,kinase,domain,containing,protein,,expressed
8-5637947	8	5637947	1	Sobic.008G055500	5641990	5648753	Sobic.008G055500.1.p,PF13350,PTHR19134,PTHR19134:SF317,3.1.3.48,AT1G71860.1,ATPTP1,PTP1,protein,tyrosine,phosphatase,1,LOC_Os12g07590.2,Protein-tyrosine,phosphatase,domain,containing,protein,,expressed
8-5637948	8	5637948	1	Sobic.008G055366	5637515	5637988	Sobic.008G055366.1.p,PF00102,PTHR19134,PTHR19134:SF317,3.1.3.48,GO:0006470,GO:0004725,AT1G71860.3,ATPTP1,PTP1,protein,tyrosine,phosphatase,1,LOC_Os12g07590.1,Protein-tyrosine,phosphatase,domain,containing,protein,,expressed
8-5637966	8	5637966	1	Sobic.008G055500	5641990	5648753	Sobic.008G055500.1.p,PF13350,PTHR19134,PTHR19134:SF317,3.1.3.48,AT1G71860.1,ATPTP1,PTP1,protein,tyrosine,phosphatase,1,LOC_Os12g07590.2,Protein-tyrosine,phosphatase,domain,containing,protein,,expressed
8-5637982	8	5637982	1	Sobic.008G055366	5637515	5637988	Sobic.008G055366.1.p,PF00102,PTHR19134,PTHR19134:SF317,3.1.3.48,GO:0006470,GO:0004725,AT1G71860.3,ATPTP1,PTP1,protein,tyrosine,phosphatase,1,LOC_Os12g07590.1,Protein-tyrosine,phosphatase,domain,containing,protein,,expressed
8-5637982	8	5637982	1	Sobic.008G055432	5638261	5641111	Sobic.008G055432.1.p,PF00069,PTHR27002,PTHR27002:SF65,2.7.11.1,GO:0006468,GO:0005524,GO:0004672,AT4G11490.1,CRK33,cysteine-rich,RLK,(RECEPTOR-like,protein,kinase),33,LOC_Os10g12620.1,protein,kinase,domain,containing,protein,,expressed
8-5637982	8	5637982	1	Sobic.008G055500	5641990	5648753	Sobic.008G055500.1.p,PF13350,PTHR19134,PTHR19134:SF317,3.1.3.48,AT1G71860.1,ATPTP1,PTP1,protein,tyrosine,phosphatase,1,LOC_Os12g07590.2,Protein-tyrosine,phosphatase,domain,containing,protein,,expressed
8-5637993	8	5637993	1	Sobic.008G055500	5641990	5648753	Sobic.008G055500.1.p,PF13350,PTHR19134,PTHR19134:SF317,3.1.3.48,AT1G71860.1,ATPTP1,PTP1,protein,tyrosine,phosphatase,1,LOC_Os12g07590.2,Protein-tyrosine,phosphatase,domain,containing,protein,,expressed
8-5638001	8	5638001	1	Sobic.008G055366	5637515	5637988	Sobic.008G055366.1.p,PF00102,PTHR19134,PTHR19134:SF317,3.1.3.48,GO:0006470,GO:0004725,AT1G71860.3,ATPTP1,PTP1,protein,tyrosine,phosphatase,1,LOC_Os12g07590.1,Protein-tyrosine,phosphatase,domain,containing,protein,,expressed
8-5638001	8	5638001	1	Sobic.008G055432	5638261	5641111	Sobic.008G055432.1.p,PF00069,PTHR27002,PTHR27002:SF65,2.7.11.1,GO:0006468,GO:0005524,GO:0004672,AT4G11490.1,CRK33,cysteine-rich,RLK,(RECEPTOR-like,protein,kinase),33,LOC_Os10g12620.1,protein,kinase,domain,containing,protein,,expressed
8-5638001	8	5638001	1	Sobic.008G055500	5641990	5648753	Sobic.008G055500.1.p,PF13350,PTHR19134,PTHR19134:SF317,3.1.3.48,AT1G71860.1,ATPTP1,PTP1,protein,tyrosine,phosphatase,1,LOC_Os12g07590.2,Protein-tyrosine,phosphatase,domain,containing,protein,,expressed
8-5638073	8	5638073	1	Sobic.008G055366	5637515	5637988	Sobic.008G055366.1.p,PF00102,PTHR19134,PTHR19134:SF317,3.1.3.48,GO:0006470,GO:0004725,AT1G71860.3,ATPTP1,PTP1,protein,tyrosine,phosphatase,1,LOC_Os12g07590.1,Protein-tyrosine,phosphatase,domain,containing,protein,,expressed
8-5638251	8	5638251	1	Sobic.008G055500	5641990	5648753	Sobic.008G055500.1.p,PF13350,PTHR19134,PTHR19134:SF317,3.1.3.48,AT1G71860.1,ATPTP1,PTP1,protein,tyrosine,phosphatase,1,LOC_Os12g07590.2,Protein-tyrosine,phosphatase,domain,containing,protein,,expressed
8-5638289	8	5638289	1	Sobic.008G055366	5637515	5637988	Sobic.008G055366.1.p,PF00102,PTHR19134,PTHR19134:SF317,3.1.3.48,GO:0006470,GO:0004725,AT1G71860.3,ATPTP1,PTP1,protein,tyrosine,phosphatase,1,LOC_Os12g07590.1,Protein-tyrosine,phosphatase,domain,containing,protein,,expressed
8-5638289	8	5638289	1	Sobic.008G055432	5638261	5641111	Sobic.008G055432.1.p,PF00069,PTHR27002,PTHR27002:SF65,2.7.11.1,GO:0006468,GO:0005524,GO:0004672,AT4G11490.1,CRK33,cysteine-rich,RLK,(RECEPTOR-like,protein,kinase),33,LOC_Os10g12620.1,protein,kinase,domain,containing,protein,,expressed
8-5638837	8	5638837	1	Sobic.008G055500	5641990	5648753	Sobic.008G055500.1.p,PF13350,PTHR19134,PTHR19134:SF317,3.1.3.48,AT1G71860.1,ATPTP1,PTP1,protein,tyrosine,phosphatase,1,LOC_Os12g07590.2,Protein-tyrosine,phosphatase,domain,containing,protein,,expressed
8-5638860	8	5638860	1	Sobic.008G055366	5637515	5637988	Sobic.008G055366.1.p,PF00102,PTHR19134,PTHR19134:SF317,3.1.3.48,GO:0006470,GO:0004725,AT1G71860.3,ATPTP1,PTP1,protein,tyrosine,phosphatase,1,LOC_Os12g07590.1,Protein-tyrosine,phosphatase,domain,containing,protein,,expressed
8-5638860	8	5638860	1	Sobic.008G055500	5641990	5648753	Sobic.008G055500.1.p,PF13350,PTHR19134,PTHR19134:SF317,3.1.3.48,AT1G71860.1,ATPTP1,PTP1,protein,tyrosine,phosphatase,1,LOC_Os12g07590.2,Protein-tyrosine,phosphatase,domain,containing,protein,,expressed
8-5638866	8	5638866	1	Sobic.008G055366	5637515	5637988	Sobic.008G055366.1.p,PF00102,PTHR19134,PTHR19134:SF317,3.1.3.48,GO:0006470,GO:0004725,AT1G71860.3,ATPTP1,PTP1,protein,tyrosine,phosphatase,1,LOC_Os12g07590.1,Protein-tyrosine,phosphatase,domain,containing,protein,,expressed
8-6050360	8	6050360	1	Sobic.008G058100	6041686	6047009	Sobic.008G058100.6.p,PF02146,PTHR11085,PTHR11085:SF6,KOG2683,3.5.1.98,GO:0070403,AT5G09230.7,AtSRT2,SRT2,sirtuin,2,LOC_Os12g07950.1,transcriptional,regulator,Sir2,family,protein,,putative,,expressed
8-6141682	8	6141682	1	Sobic.008G058500	6145464	6147947	Sobic.008G058500.1.p,PF00067,PTHR24298,PTHR24298:SF144,KOG0156,1.14.13.68,GO:0055114,GO:0020037,GO:0016705,GO:0005506,AT3G26300.1,CYP71B34,cytochrome,P450,,family,71,,subfamily,B,,polypeptide,34,LOC_Os03g63310.1,cytochrome,P450,71E1,,putative,,expressed
SNP_GROUP	CHR	SNP_POS	NUM_SNPs	GENE_ID	GENE_Start	GENE_End	GeneINFO: NDF
1-24419224	1	24419224	1	Sobic.001G237900	24426353	24428132	Sobic.001G237900.1.p,PF03330,PF01357,PTHR31867,PTHR31867:SF17,AT1G20190.1,ATEXP11,ATEXPA11,ATHEXP,ALPHA,1.14,EXP11,EXPA11,expansin,11,LOC_Os10g30340.1,expansin,precursor,,putative,,expressed
1-67432697	1	67432697	1	Sobic.001G386600	67421467	67424515	Sobic.001G386600.1.p,PF00046,PTHR24326,PTHR24326:SF280,GO:0003677,AT3G03660.1,WOX11,WUSCHEL,related,homeobox,11,LOC_Os03g20910.2,homeobox,domain,containing,protein,,expressed
1-67432697	1	67432697	1	Sobic.001G386700	67431733	67434257	Sobic.001G386700.1.p,PF00249,PF14379,PTHR31499,PTHR31499:SF4,AT3G04030.3,Homeodomain-like,superfamily,protein,LOC_Os03g20900.1,Myb,transcription,factor,,putative,,expressed
1-67432697	1	67432697	1	Sobic.001G386900	67440548	67444436	Sobic.001G386900.2.p,PF02887,PF00224,PTHR11817,PTHR11817:SF30,2.7.1.40,GO:0030955,GO:0006096,GO:0004743,GO:0000287,AT5G56350.1,Pyruvate,kinase,family,protein,LOC_Os01g16960.1,pyruvate,kinase,,putative,,expressed
1-67433181	1	67433181	1	Sobic.001G386600	67421467	67424515	Sobic.001G386600.1.p,PF00046,PTHR24326,PTHR24326:SF280,GO:0003677,AT3G03660.1,WOX11,WUSCHEL,related,homeobox,11,LOC_Os03g20910.2,homeobox,domain,containing,protein,,expressed
1-67435017	1	67435017	1	Sobic.001G387000	67444796	67446712	Sobic.001G387000.2.p,PF14369,PF13639,PTHR22763,PTHR22763:SF41,6.3.2.19,K11982,GO:0008270,GO:0005515,AT5G56340.1,ATCRT1,RING/U-box,superfamily,protein,LOC_Os03g20870.1,zinc,finger,,C3HC4,type,domain,containing,protein,,expressed
2-8215288	2	8215288	1	Sobic.002G078850	8204439	8206181	Sobic.002G078850.1.p,PF04873,PTHR33305,PTHR33305:SF8,K14514,AT1G73730.1,AtEIL3,ATSLIM,EIL3,SLIM1,ETHYLENE-INSENSITIVE3-like,3,LOC_Os07g12210.1,expressed,protein
2-8215288	2	8215288	1	Sobic.002G078900	8207320	8211058	Sobic.002G078900.9.p,PF05641,PTHR31917,PTHR31917:SF18,AT1G26540.1,Agenet,domain-containing,protein,LOC_Os11g35060.1,agenet,domain,containing,protein,,expressed
2-8215288	2	8215288	1	Sobic.002G079000	8219774	8225940	Sobic.002G079000.1.p,PTHR35471,AT1G55535.1,LOC_Os07g12220.1,expressed,protein
2-8215290	2	8215290	1	Sobic.002G078850	8204439	8206181	Sobic.002G078850.1.p,PF04873,PTHR33305,PTHR33305:SF8,K14514,AT1G73730.1,AtEIL3,ATSLIM,EIL3,SLIM1,ETHYLENE-INSENSITIVE3-like,3,LOC_Os07g12210.1,expressed,protein
2-8215290	2	8215290	1	Sobic.002G078900	8207320	8211058	Sobic.002G078900.3.p,PF05641,PF05266,PTHR31917,PTHR31917:SF18,AT1G26540.1,Agenet,domain-containing,protein,LOC_Os11g35060.1,agenet,domain,containing,protein,,expressed
2-8215290	2	8215290	1	Sobic.002G078900	8207320	8211058	Sobic.002G078900.4.p,PF05641,PTHR31917,PTHR31917:SF18,AT1G26540.1,Agenet,domain-containing,protein,LOC_Os11g35060.1,agenet,domain,containing,protein,,expressed
2-9496268	2	9496268	1	Sobic.002G090900	9495658	9497800	Sobic.002G090900.1.p,PF00067,PTHR24298,PTHR24298:SF175,KOG0156,1.14.13.144,GO:0055114,GO:0020037,GO:0016705,GO:0005506,AT4G31500.1,ATR4,CYP83B1,RED1,RNT1,SUR2,cytochrome,P450,,family,83,,subfamily,B,,polypeptide,1,LOC_Os04g10160.1,cytochrome,P450,,putative,,expressed
4-55640037	4	55640037	1	Sobic.004G204900	55632561	55639949	Sobic.004G204900.1.p,PF00479,PF02781,PTHR23429,PTHR23429:SF6,1.1.1.49,K00036,GO:0055114,GO:0050661,GO:0006006,GO:0004345,AT5G40760.1,G6PD6,glucose-6-phosphate,dehydrogenase,6,LOC_Os02g38840.2,glucose-6-phosphate,1-dehydrogenase,,cytoplasmic,isoform,,putative,,expressed
4-56527960	4	56527960	1	Sobic.004G215100	56513900	56520309	Sobic.004G215100.1.p,PF14383,PF14309,PTHR21726,PTHR21726:SF44,AT2G20240.1,Protein,of,unknown,function,(DUF3741),LOC_Os02g40410.1,expressed,protein
4-56527960	4	56527960	1	Sobic.004G215400	56536262	56537411	Sobic.004G215400.1.p,PF03088,PTHR10426,PTHR10426:SF28,KOG1520,4.3.3.2,GO:0016844,GO:0009058,AT3G57030.1,Calcium-dependent,phosphotriesterase,superfamily,protein,LOC_Os06g41850.1,SMP-30/Gluconolaconase/LRE-like,region,containing,protein,,expressed
4-56604867	4	56604867	1	Sobic.004G216200	56593948	56598351	Sobic.004G216200.2.p,PF00069,PTHR24350,KOG0580,2.7.11.1,K08850,GO:0006468,GO:0005524,GO:0004672,GO:0007049,AT4G32830.1,AtAUR1,AUR1,ataurora1,LOC_Os01g09580.2,CAMK_CAMK_like_Aur_like.1,-,CAMK,includes,calcium/calmodulin,depedent,protein,kinases,,expressed
4-56604958	4	56604958	1	Sobic.004G216400	56605471	56609930	Sobic.004G216400.1.p,PF13943,PTHR24106,PTHR24106:SF156,KOG1909,K14319,AT3G63130.2,ATRANGAP1,RANGAP1,RAN,GTPase,activating,protein,1,LOC_Os05g46560.1,RAN,GTPase-activating,protein,1,,putative,,expressed
4-56620454	4	56620454	1	Sobic.004G216600	56619624	56623617	Sobic.004G216600.1.p,PF00462,PTHR10168:SF104,PTHR10168,KOG1752,1.8.1.9,K03676,GO:0009055,GO:0015035,GO:0045454,AT5G40370.1,Glutaredoxin,family,protein,LOC_Os02g40500.1,OsGrx_C2.1,-,glutaredoxin,subgroup,I,,expressed
4-56620454	4	56620454	1	Sobic.004G216800	56629951	56632601	Sobic.004G216800.1.p,PF04135,PTHR13305,PTHR13305:SF0,KOG3503,K11130,GO:0072588,GO:0042254,GO:0030515,GO:0001522,AT2G20490.1,EDA27,NOP10,nucleolar,RNA-binding,Nop10p,family,protein,LOC_Os02g40514.2,h/ACA,ribonucleoprotein,complex,subunit,3,,putative,,expressed
4-63969940	4	63969940	1	Sobic.004G300800	63955597	63960188	Sobic.004G300800.1.p,PF00171,PTHR11699,PTHR11699:SF195,1.2.1.5,K00128,GO:0055114,GO:0016491,GO:0008152,AT4G36250.1,ALDH3F1,aldehyde,dehydrogenase,3F1,LOC_Os02g43194.1,aldehyde,dehydrogenase,,putative,,expressed
4-63969940	4	63969940	1	Sobic.004G300900	63961289	63963913	Sobic.004G300900.1.p,PF00462,PTHR10168,PTHR10168:SF116,KOG1752,1.8.1.9,K03676,GO:0045454,GO:0015035,GO:0009055,AT1G77370.1,Glutaredoxin,family,protein,LOC_Os02g43180.1,OsGrx_C3,-,glutaredoxin,subgroup,I,,expressed
4-63969940	4	63969940	1	Sobic.004G301000	63965162	63967492	Sobic.004G301000.1.p,PF00643,PTHR31832,PTHR31832:SF12,GO:0008270,GO:0005622,AT1G75540.1,STH2,salt,tolerance,homolog2,LOC_Os02g43170.1,B-box,zinc,finger,family,protein,,putative,,expressed
5-2240342	5	2240342	1	Sobic.005G024800	2237333	2245486	Sobic.005G024800.1.p,PF00083,PTHR23504,PTHR23504:SF33,KOG2615,GO:0055085,GO:0022857,GO:0016021,AT5G13750.1,ZIFL1,zinc,induced,facilitator-like,1,LOC_Os12g03899.1,major,facilitator,superfamily,antiporter,,putative,,expressed
6-60028378	6	60028378	1	Sobic.006G266700	60022668	60028780	Sobic.006G266700.1.p,PF06325,PTHR11006,PTHR11006:SF70,KOG1499,2.1.1.125,K11437,GO:0008168,GO:0006479,AT3G20020.1,ATPRMT6,PRMT6,protein,arginine,methyltransferase,6,LOC_Os04g58060.2,methyltransferase,,putative,,expressed
6-60028378	6	60028378	1	Sobic.006G266800	60029522	60030937	Sobic.006G266800.1.p,PF00026,PTHR13683,PTHR13683:SF265,KOG1339,3.4.23.12,GO:0006508,GO:0004190,AT3G20015.1,Eukaryotic,aspartyl,protease,family,protein,LOC_Os04g58070.1,aspartic,proteinase,nepenthesin,precursor,,putative,,expressed
6-60028378	6	60028378	1	Sobic.006G266900	60037270	60038859	Sobic.006G266900.1.p,PF08263,PF00560,PF13855,PTHR27000,PTHR27000:SF102,KOG0617,2.7.11.1,GO:0005515,AT5G23400.1,Leucine-rich,repeat,(LRR),family,protein,LOC_Os04g58080.1,polygalacturonase,inhibitor,3,precursor,,putative,,expressed
8-5599936	8	5599936	1	Sobic.008G055300	5601179	5604705	Sobic.008G055300.4.p,PF08660,PTHR12154,PTHR12154:SF4,KOG3339,AT4G18230.1,LOC_Os03g30934.1,UDP-N-acetylglucosamine,transferase,subunit,ALG14,,putative,,expressed
8-5638659	8	5638659	1	Sobic.008G055366	5637515	5637988	Sobic.008G055366.1.p,PF00102,PTHR19134,PTHR19134:SF317,3.1.3.48,GO:0006470,GO:0004725,AT1G71860.3,ATPTP1,PTP1,protein,tyrosine,phosphatase,1,LOC_Os12g07590.1,Protein-tyrosine,phosphatase,domain,containing,protein,,expressed
8-5638662	8	5638662	1	Sobic.008G055432	5638261	5641111	Sobic.008G055432.1.p,PF00069,PTHR27002,PTHR27002:SF65,2.7.11.1,GO:0006468,GO:0005524,GO:0004672,AT4G11490.1,CRK33,cysteine-rich,RLK,(RECEPTOR-like,protein,kinase),33,LOC_Os10g12620.1,protein,kinase,domain,containing,protein,,expressed
8-5638678	8	5638678	1	Sobic.008G055500	5641990	5648753	Sobic.008G055500.1.p,PF13350,PTHR19134,PTHR19134:SF317,3.1.3.48,AT1G71860.1,ATPTP1,PTP1,protein,tyrosine,phosphatase,1,LOC_Os12g07590.2,Protein-tyrosine,phosphatase,domain,containing,protein,,expressed
8-5687219	8	5687219	1	Sobic.008G055700	5681341	5683950	Sobic.008G055700.2.p,PF00249,PTHR10641,PTHR10641:SF643,K09422,AT4G38620.1,ATMYB4,MYB4,myb,domain,protein,4,LOC_Os09g36730.1,MYB,family,transcription,factor,,putative,,expressed
8-6050360	8	6050360	1	Sobic.008G058100	6041686	6047009	Sobic.008G058100.6.p,PF02146,PTHR11085,PTHR11085:SF6,KOG2683,3.5.1.98,GO:0070403,AT5G09230.7,AtSRT2,SRT2,sirtuin,2,LOC_Os12g07950.1,transcriptional,regulator,Sir2,family,protein,,putative,,expressed
8-6141682	8	6141682	1	Sobic.008G058500	6145464	6147947	Sobic.008G058500.1.p,PF00067,PTHR24298,PTHR24298:SF144,KOG0156,1.14.13.68,GO:0055114,GO:0020037,GO:0016705,GO:0005506,AT3G26300.1,CYP71B34,cytochrome,P450,,family,71,,subfamily,B,,polypeptide,34,LOC_Os03g63310.1,cytochrome,P450,71E1,,putative,,expressed
8-10794424	8	10794424	1	Sobic.008G074500	10791441	10797006	Sobic.008G074500.1.p,PF07714,PTHR27003,PTHR27003:SF34,KOG1187,2.7.11.1,GO:0006468,GO:0004672,AT1G79620.1,Leucine-rich,repeat,protein,kinase,family,protein,LOC_Os12g10740.1,leucine-rich,repeat,family,protein,,putative,,expressed
8-11355796	8	11355796	1	Sobic.008G076200	11358540	11366827	Sobic.008G076200.1.p,PF04116,PF12076,PTHR11863,PTHR11863:SF54,K15404,GO:0055114,GO:0016491,GO:0006633,GO:0005506,AT1G02205.1,CER1,Fatty,acid,hydroxylase,superfamily,LOC_Os02g56920.1,WAX2,,putative,,expressed
8-12090762	8	12090762	1	Sobic.008G077800	12100035	12105169	Sobic.008G077800.1.p,PF00657,PTHR22835,PTHR22835:SF190,3.1.1.3,GO:0016788,AT3G16370.1,GDSL-like,Lipase/Acylhydrolase,superfamily,protein,LOC_Os12g37910.2,GDSL-like,lipase/acylhydrolase,,putative,,expressed
8-12090762	8	12090762	1	Sobic.008G077800	12100035	12105169	Sobic.008G077800.2.p,PF00657,PTHR22835,PTHR22835:SF190,3.1.1.3,GO:0016788,AT3G16370.1,GDSL-like,Lipase/Acylhydrolase,superfamily,protein,LOC_Os12g37910.2,GDSL-like,lipase/acylhydrolase,,putative,,expressed
8-13453784	8	13453784	1	Sobic.008G079900	13460758	13463451	Sobic.008G079900.1.p,PF00560,PTHR24106,PTHR24106:SF146,GO:0005515,AT2G20210.1,RNI-like,superfamily,protein,LOC_Os12g12740.1,leucine-rich,repeat,family,protein,,putative,,expressed
8-13453784	8	13453784	1	Sobic.008G080000	13463452	13467068	Sobic.008G080000.1.p,PTHR24106,PTHR24106:SF146,AT2G20210.1,RNI-like,superfamily,protein,LOC_Os12g12740.1,leucine-rich,repeat,family,protein,,putative,,expressed
8-14088342	8	14088342	1	Sobic.008G080700	14089853	14093461	Sobic.008G080700.1.p,PF13499,PF07714,PTHR24349,PTHR24349:SF159,KOG0032,2.7.11.1,K13412,GO:0006468,GO:0004672,AT3G57530.1,ATCPK32,CDPK32,CPK32,calcium-dependent,protein,kinase,32,LOC_Os12g12860.1,CAMK_CAMK_like.46,-,CAMK,includes,calcium/calmodulin,depedent,protein,kinases,,expressed
8-16019490	8	16019490	1	Sobic.008G083700	16008828	16010567	Sobic.008G083700.1.p,PF13639,PTHR14155,PTHR14155:SF133,GO:0008270,GO:0005515,AT3G48030.1,hypoxia-responsive,family,protein,/,zinc,finger,(C3HC4-type,RING,finger),family,protein,LOC_Os02g50930.1,RING-H2,finger,protein,,putative,,expressed
8-16256652	8	16256652	1	Sobic.008G084501	16240634	16248329	Sobic.008G084501.1.p,AT4G28706.4,pfkB-like,carbohydrate,kinase,family,protein,LOC_Os08g45180.1,kinase,,pfkB,family,,putative,,expressed
8-18043479	8	18043479	1	Sobic.008G087500	18037998	18040961	Sobic.008G087500.1.p,PTHR33595,PTHR33595:SF3,AT5G50360.1,LOC_Os12g13910.1,expressed,protein
8-20506054	8	20506054	1	Sobic.008G088827	20498037	20499998	Sobic.008G088827.1.p,PF00098,GO:0008270,GO:0003676,AT3G43590.1,zinc,knuckle,(CCHC-type),family,protein,LOC_Os04g45890.1,retrotransposon,protein,,putative,,unclassified,,expressed
8-20876779	8	20876779	1	Sobic.008G088830	20861686	20877386	Sobic.008G088830.1.p,PF12695,PTHR12277,PTHR12277:SF42,KOG1552,AT4G24760.1,alpha/beta-Hydrolases,superfamily,protein,LOC_Os12g18860.1,OsPOP23,-,Putative,Prolyl,Oligopeptidase,homologue,,expressed
8-22113552	8	22113552	1	Sobic.008G088842	22123053	22138308	Sobic.008G088842.1.p,PF02375,PF02373,PTHR10694,PTHR10694:SF50,KOG3576,1.14.11.27,AT3G48430.1,REF6,relative,of,early,flowering,6,LOC_Os12g18150.1,ZOS12-04,-,C2H2,zinc,finger,protein,,expressed
8-22142461	8	22142461	1	Sobic.008G088842	22123053	22138308	Sobic.008G088842.1.p,PF02375,PF02373,PTHR10694,PTHR10694:SF50,KOG3576,1.14.11.27,AT3G48430.1,REF6,relative,of,early,flowering,6,LOC_Os12g18150.1,ZOS12-04,-,C2H2,zinc,finger,protein,,expressed
8-32834548	8	32834548	1	Sobic.008G089700	32810818	32882137	Sobic.008G089700.10.p,PF07039,PTHR21539,KOG3038,K11364,AT3G27460.1,SGF29,tudor-like,domain,LOC_Os12g19350.1,expressed,protein
8-37954681	8	37954681	1	Sobic.008G091400	37962849	37976415	Sobic.008G091400.1.p,PF00334,PTHR11349,PTHR11349:SF66,2.7.4.6,GO:0006241,GO:0006228,GO:0006183,GO:0006165,GO:0004550,AT4G09320.1,NDPK1,Nucleoside,diphosphate,kinase,family,protein,LOC_Os10g41410.1,nucleoside,diphosphate,kinase,,putative,,expressed
8-39597795	8	39597795	1	Sobic.008G092200	39591021	39594189	Sobic.008G092200.1.p,PF03004,PTHR33063,PTHR33063:SF5,LOC_Os06g13250.1,hypothetical,protein
8-39659213	8	39659213	1	Sobic.008G092300	39668501	39691345	Sobic.008G092300.3.p,PF00642,PTHR12506,PTHR12506:SF20,GO:0046872,AT3G48440.1,Zinc,finger,C-x8-C-x5-C-x3-H,type,family,protein,LOC_Os12g18120.2,zinc,finger,C-x8-C-x5-C-x3-H,type,family,protein,,expressed
8-45221686	8	45221686	1	Sobic.008G096000	45231621	45237932	Sobic.008G096000.2.p,PF02309,PF02362,PF06507,PTHR31384,PTHR31384:SF8,GO:0006355,GO:0005634,GO:0003677,GO:0009725,AT5G62000.4,ARF1-BP,ARF2,HSS,ORE14,auxin,response,factor,2,LOC_Os12g29520.3,auxin,response,factor,,putative,,expressed
8-50533766	8	50533766	1	Sobic.008G107300	50524236	50526414	Sobic.008G107300.1.p,PF08263,PF00560,PF13855,PTHR27000,PTHR27000:SF209,KOG0472,2.7.11.1,GO:0005515,AT1G72300.1,Leucine-rich,receptor-like,protein,kinase,family,protein,LOC_Os02g06070.1,phytosulfokine,receptor,precursor,,putative,,expressed
9-56336686	9	56336686	1	Sobic.009G219800	56344174	56345457	Sobic.009G219800.1.p,PTHR34272,AT2G16190.1,LOC_Os05g47620.1,expressed,protein
9-56422688	9	56422688	1	Sobic.009G221000	56414893	56420312	Sobic.009G221000.1.p,PF00931,PTHR23155,PTHR23155:SF414,KOG1947,GO:0043531,AT3G14470.1,NB-ARC,domain-containing,disease,resistance,protein,LOC_Os04g53160.1,NBS-LRR,disease,resistance,protein,,putative,,expressed
9-56449487	9	56449487	1	Sobic.009G221200	56436741	56442020	Sobic.009G221200.1.p,PF00931,PTHR23155,PTHR23155:SF414,GO:0043531,AT3G14460.1,LRR,and,NB-ARC,domains-containing,disease,resistance,protein,LOC_Os04g53160.1,NBS-LRR,disease,resistance,protein,,putative,,expressed
9-56449487	9	56449487	1	Sobic.009G221400	56455661	56457180	Sobic.009G221400.1.p,PF00847,PF02362,PTHR31140,PTHR31140:SF3,K09287,GO:0006355,GO:0003700,GO:0003677,AT1G13260.1,EDF4,RAV1,related,to,ABI3/VP1,1,LOC_Os05g47650.1,B3,DNA,binding,domain,containing,protein,,expressed
9-57501640	9	57501640	1	Sobic.009G236200	57502067	57504402	Sobic.009G236200.2.p,PF00069,PF00139,PTHR27007,PTHR27007:SF14,KOG1187,2.7.11.1,GO:0006468,GO:0005524,GO:0004672,GO:0030246,AT2G37710.1,RLK,receptor,lectin,kinase,LOC_Os07g03890.1,lectin-like,receptor,kinase,7,,putative,,expressed
9-57501640	9	57501640	1	Sobic.009G236300	57507657	57511287	Sobic.009G236300.1.p,PF00069,PF00139,PTHR27007,PTHR27007:SF4,KOG1187,2.7.11.1,GO:0006468,GO:0005524,GO:0004672,GO:0030246,AT3G53810.1,Concanavalin,A-like,lectin,protein,kinase,family,protein,LOC_Os07g03900.1,lectin-like,receptor,kinase,,putative,,expressed
9-57534812	9	57534812	1	Sobic.009G236600	57525244	57525910	Sobic.009G236600.1.p,PTHR33264,PTHR33264:SF6,AT3G01516.1,LOC_Os05g49340.1,expressed,protein
9-57534812	9	57534812	1	Sobic.009G236700	57527773	57529957	Sobic.009G236700.1.p,PTHR33095,PTHR33095:SF8,LOC_Os05g49350.1,DUF1645,domain,containing,protein,,putative,,expressed
9-57534812	9	57534812	1	Sobic.009G236800	57529958	57531904	Sobic.009G236800.1.p,PF07816,PTHR33095,PTHR33095:SF9,AT3G27880.1,Protein,of,unknown,function,(DUF1645),LOC_Os05g49350.1,DUF1645,domain,containing,protein,,putative,,expressed
9-57534812	9	57534812	1	Sobic.009G237100	57540825	57547713	Sobic.009G237100.1.p,PF01758,PTHR18640,PTHR18640:SF9,KOG4821,K14347,GO:0016020,AT3G56160.1,Sodium,Bile,acid,symporter,family,LOC_Os02g32930.1,bile,acid,sodium,symporter,,putative,,expressed
9-57597290	9	57597290	1	Sobic.009G238000	57602900	57611460	Sobic.009G238000.1.p,PF00069,PF00400,PTHR22847,PTHR22847:SF488,KOG1033,K16240,GO:0006468,GO:0005524,GO:0004672,GO:0005515,AT2G46340.1,SPA1,SPA,(suppressor,of,phyA-105),protein,family,LOC_Os05g49590.1,suppressor,of,phythchrome,A,,putative,,expressed
9-57695119	9	57695119	1	Sobic.009G239000	57687169	57688124	Sobic.009G239000.1.p,PF00319,PTHR11945,PTHR11945:SF225,GO:0046983,GO:0003677,AT5G60440.1,AGL62,AGAMOUS-like,62,LOC_Os09g02830.1,OsMADS78,-,MADS-box,family,gene,with,M-alpha,type-box,,expressed
9-58047061	9	58047061	1	Sobic.009G244700	58052518	58060857	Sobic.009G244700.1.p,PTHR23172,PTHR23172:SF19,KOG0431,AT1G75310.1,AUL1,auxin-like,1,protein,LOC_Os05g50370.1,dnaJ,domain,containing,protein,,expressed
9-58569144	9	58569144	1	Sobic.009G250400	58569482	58571936	Sobic.009G250400.1.p,PF04542,PF04545,PF04539,PTHR30603,PTHR30603:SF4,K03093,GO:0016987,GO:0006355,GO:0006352,GO:0003700,GO:0003677,AT5G24120.1,ATSIG5,SIG5,SIGE,sigma,factor,E,LOC_Os05g50930.1,RNA,polymerase,sigma,factor,,putative,,expressed
9-58569144	9	58569144	1	Sobic.009G250500	58573119	58574586	Sobic.009G250500.1.p,PTHR34967,PTHR34967:SF2,AT5G24130.1,LOC_Os05g50940.1,expressed,protein
9-58569144	9	58569144	1	Sobic.009G250600	58575141	58575923	Sobic.009G250600.2.p,PF00646,PTHR32133,PTHR32133:SF157,GO:0005515,AT1G32660.1,F-box,and,associated,interaction,domains-containing,protein,LOC_Os02g03910.1,OsFBX35,-,F-box,domain,containing,protein,,expressed
9-58803795	9	58803795	1	Sobic.009G254100	58801713	58810021	Sobic.009G254100.1.p,PF00271,PF04408,PF07717,PTHR18934,PTHR18934:SF143,3.6.4.13,K12818,GO:0004386,AT1G26370.1,RNA,helicase,family,protein,LOC_Os06g09280.1,ATP-dependent,RNA,helicase,,putative,,expressed
10-10656212	10	10656212	1	Sobic.010G107901	10651330	10655920	Sobic.010G107901.1.p,PTHR13278,K13104,AT3G02860.2,zinc,ion,binding,LOC_Os05g41530.1,ZOS5-11,-,C2H2,zinc,finger,protein,,expressed
SNP_GROUP	Chromosome	SNP_Position	NUM_SNPs	GENE_ID	GENE_Start	GENE_End	GeneINFO: ADF
1-8016164	1	8016164	1	Sobic.001G104600	8022153	8023839	Sobic.001G104600.1.p,PF13911,PTHR28630,PTHR28630:SF4,KOG4498,AT5G65840.1,Thioredoxin,superfamily,protein,LOC_Os03g51960.1,expressed,protein
1-8016164	1	8016164	1	Sobic.001G104700	8024153	8027666	Sobic.001G104700.1.p,PF13911,PTHR28630,PTHR28630:SF4,KOG4498,AT5G65840.1,Thioredoxin,superfamily,protein,LOC_Os03g51950.1,expressed,protein
1-56058205	1	56058205	1	Sobic.001G286100	56060008	56063928	Sobic.001G286100.1.p,PF05770,PTHR14217,PTHR14217:SF5,2.7.1.134,2.7.1.159,K00913,GO:0052726,GO:0052725,GO:0047325,GO:0032957,GO:0005622,GO:0005524,GO:0000287,AT5G16760.1,Inositol,1,3,4-trisphosphate,5/6-kinase,family,protein,LOC_Os10g42550.1,Inositol,1,,3,,4-trisphosphate,5/6-kinase,,putative,,expressed
3-7198897	3	7198897	1	Sobic.003G083900	7206229	7213514	Sobic.003G083900.1.p,PF12706,PTHR23131,PTHR23131:SF2,KOG0813,1.13.11.18,AT1G25375.1,Metallo-hydrolase/oxidoreductase,superfamily,protein,LOC_Os01g04200.1,metallo-beta-lactamase,family,protein,,putative,,expressed
3-7198963	3	7198963	1	Sobic.003G083600	7192003	7193753	Sobic.003G083600.1.p,PF02485,PTHR31042,PTHR31042:SF26,GO:0016020,GO:0008375,AT1G68390.1,Core-2/I-branching,beta-1,6-N-acetylglucosaminyltransferase,family,protein,LOC_Os10g08280.1,DNA,binding,protein,,putative,,expressed
3-7232517	3	7232517	1	Sobic.003G084100	7226876	7227950	Sobic.003G084100.1.p,PF05553,AT5G38700.1,LOC_Os01g04170.1,expressed,protein
3-7232517	3	7232517	1	Sobic.003G084200	7229152	7235363	Sobic.003G084200.1.p,PF14383,PF14309,PTHR21726,PTHR21726:SF35,AT1G67040.1,LOC_Os01g04160.1,expressed,protein
3-7232517	3	7232517	1	Sobic.003G084300	7238221	7241330	Sobic.003G084300.3.p,PF06179,PTHR12434,KOG3304,K15139,GO:0016592,GO:0006357,GO:0001104,AT1G07950.1,MED22B,Surfeit,locus,protein,5,subunit,22,of,Mediator,complex,LOC_Os08g37480.2,mediator,of,RNA,polymerase,II,transcription,subunit,22,,putative,,expressed
3-7246789	3	7246789	1	Sobic.003G084400	7256726	7258701	Sobic.003G084400.2.p,AT1G68360.1,C2H2,and,C2HC,zinc,fingers,superfamily,protein,LOC_Os01g04120.1,ZOS1-03,-,C2H2,zinc,finger,protein,,expressed
3-7389094	3	7389094	1	Sobic.003G085700	7382483	7388314	Sobic.003G085700.4.p,PTHR34539,PTHR34539:SF1,AT1G13360.1,LOC_Os01g04010.1,expressed,protein
3-7419896	3	7419896	1	Sobic.003G085900	7424497	7431325	Sobic.003G085900.1.p,PF16863,PF01055,PTHR22762,PTHR22762:SF56,3.2.1.177,3.2.1.55,3.2.1.37,K15925,GO:0005975,GO:0004553,AT1G68560.1,ATXYL1,TRG1,XYL1,alpha-xylosidase,1,LOC_Os01g03950.1,glycosyl,hydrolase,,family,31,,putative,,expressed
6-878481	6	878481	1	Sobic.006G005600	868221	871154	Sobic.006G005600.1.p,PF02518,PF00183,PTHR11528,PTHR11528:SF53,K04079,GO:0051082,GO:0006950,GO:0006457,GO:0005524,AT5G52640.1,ATHS83,AtHsp90-1,ATHSP90.1,HSP81-1,HSP81.1,HSP83,HSP90.1,heat,shock,protein,90.1,LOC_Os04g01740.1,heat,shock,protein,,putative,,expressed
6-878481	6	878481	1	Sobic.006G005700	875850	877751	Sobic.006G005700.1.p,PF00450,PTHR11802,PTHR11802:SF65,3.4.16.5,K09646,GO:0006508,GO:0004185,AT2G27920.1,SCPL51,serine,carboxypeptidase-like,51,LOC_Os03g27590.1,OsSCP18,-,Putative,Serine,Carboxypeptidase,homologue,,expressed
6-1304604	6	1304604	1	Sobic.006G008800	1302649	1307415	Sobic.006G008800.1.p,PF02319,PF16421,PTHR12081,PTHR12081:SF49,KOG2577,K06620,GO:0006355,GO:0005667,GO:0003700,AT5G22220.2,ATE2FB,E2F1,E2FB,E2F,transcription,factor,1,LOC_Os04g02140.1,transposon,protein,,putative,,CACTA,,En/Spm,sub-class,,expressed
6-1304604	6	1304604	1	Sobic.006G008900	1311375	1320979	Sobic.006G008900.1.p,PF07714,PTHR27003:SF89,PTHR27003,KOG1187,2.7.11.1,GO:0004672,GO:0006468,AT3G46290.1,HERK1,hercules,receptor,kinase,1,LOC_Os05g06990.1,TKL_IRAK_CrRLK1L-1.10,-,The,CrRLK1L-1,subfamily,has,homology,to,the,CrRLK1L,homolog,,expressed
6-43349984	6	43349984	1	Sobic.006G070830	43344453	43349422	Sobic.006G070830.1.p,PF08244,PF00251,PTHR31953,PTHR31953:SF3,3.2.1.26,K01193,AT3G52600.1,AtcwINV2,CWINV2,cell,wall,invertase,2,LOC_Os04g33740.1,glycosyl,hydrolases,,putative,,expressed
6-43349984	6	43349984	1	Sobic.006G071362	43359681	43366424	Sobic.006G071362.1.p,PF00664,PF00005,PTHR24221,PTHR24221:SF112,KOG0057,3.6.3.43,K02021,GO:0055085,GO:0042626,GO:0016021,GO:0006810,GO:0005524,GO:0016887,AT5G03910.1,ATATH12,ATH12,ABC2,homolog,12,LOC_Os04g33700.1,ABC,transmembrane,transporter,domain,containing,protein,,expressed
6-43350723	6	43350723	1	Sobic.006G070830	43344453	43349422	Sobic.006G070830.1.p,PF08244,PF00251,PTHR31953,PTHR31953:SF3,3.2.1.26,K01193,AT3G52600.1,AtcwINV2,CWINV2,cell,wall,invertase,2,LOC_Os04g33740.1,glycosyl,hydrolases,,putative,,expressed
6-43350723	6	43350723	1	Sobic.006G071362	43359681	43366424	Sobic.006G071362.1.p,PF00664,PF00005,PTHR24221,PTHR24221:SF112,KOG0057,3.6.3.43,K02021,GO:0055085,GO:0042626,GO:0016021,GO:0006810,GO:0005524,GO:0016887,AT5G03910.1,ATATH12,ATH12,ABC2,homolog,12,LOC_Os04g33700.1,ABC,transmembrane,transporter,domain,containing,protein,,expressed
6-43351876	6	43351876	1	Sobic.006G071096	43353433	43354267	Sobic.006G071096.1.p,PF11250,PTHR33155,PTHR33155:SF5,LOC_Os04g33710.1,expressed,protein
6-43351876	6	43351876	1	Sobic.006G071362	43359681	43366424	Sobic.006G071362.1.p,PF00664,PF00005,PTHR24221,PTHR24221:SF112,KOG0057,3.6.3.43,K02021,GO:0055085,GO:0042626,GO:0016021,GO:0006810,GO:0005524,GO:0016887,AT5G03910.1,ATATH12,ATH12,ABC2,homolog,12,LOC_Os04g33700.1,ABC,transmembrane,transporter,domain,containing,protein,,expressed
6-43351883	6	43351883	1	Sobic.006G070830	43344453	43349422	Sobic.006G070830.1.p,PF08244,PF00251,PTHR31953,PTHR31953:SF3,3.2.1.26,K01193,AT3G52600.1,AtcwINV2,CWINV2,cell,wall,invertase,2,LOC_Os04g33740.1,glycosyl,hydrolases,,putative,,expressed
6-43352750	6	43352750	1	Sobic.006G071096	43353433	43354267	Sobic.006G071096.1.p,PF11250,PTHR33155,PTHR33155:SF5,LOC_Os04g33710.1,expressed,protein
6-43352750	6	43352750	1	Sobic.006G071362	43359681	43366424	Sobic.006G071362.1.p,PF00664,PF00005,PTHR24221,PTHR24221:SF112,KOG0057,3.6.3.43,K02021,GO:0055085,GO:0042626,GO:0016021,GO:0006810,GO:0005524,GO:0016887,AT5G03910.1,ATATH12,ATH12,ABC2,homolog,12,LOC_Os04g33700.1,ABC,transmembrane,transporter,domain,containing,protein,,expressed
6-43355398	6	43355398	1	Sobic.006G070830	43344453	43349422	Sobic.006G070830.1.p,PF08244,PF00251,PTHR31953,PTHR31953:SF3,3.2.1.26,K01193,AT3G52600.1,AtcwINV2,CWINV2,cell,wall,invertase,2,LOC_Os04g33740.1,glycosyl,hydrolases,,putative,,expressed
6-43355398	6	43355398	1	Sobic.006G071096	43353433	43354267	Sobic.006G071096.1.p,PF11250,PTHR33155,PTHR33155:SF5,LOC_Os04g33710.1,expressed,protein
6-43355398	6	43355398	1	Sobic.006G071362	43359681	43366424	Sobic.006G071362.1.p,PF00664,PF00005,PTHR24221,PTHR24221:SF112,KOG0057,3.6.3.43,K02021,GO:0055085,GO:0042626,GO:0016021,GO:0006810,GO:0005524,GO:0016887,AT5G03910.1,ATATH12,ATH12,ABC2,homolog,12,LOC_Os04g33700.1,ABC,transmembrane,transporter,domain,containing,protein,,expressed
6-43359512	6	43359512	1	Sobic.006G071096	43353433	43354267	Sobic.006G071096.1.p,PF11250,PTHR33155,PTHR33155:SF5,LOC_Os04g33710.1,expressed,protein
6-43359512	6	43359512	1	Sobic.006G071362	43359681	43366424	Sobic.006G071362.1.p,PF00664,PF00005,PTHR24221,PTHR24221:SF112,KOG0057,3.6.3.43,K02021,GO:0055085,GO:0042626,GO:0016021,GO:0006810,GO:0005524,GO:0016887,AT5G03910.1,ATATH12,ATH12,ABC2,homolog,12,LOC_Os04g33700.1,ABC,transmembrane,transporter,domain,containing,protein,,expressed
6-43359512	6	43359512	1	Sobic.006G071628	43367068	43375291	Sobic.006G071628.1.p,PF04810,PF08033,PF04815,PF04811,PTHR13803,PTHR13803:SF10,KOG1985,GO:0030127,GO:0008270,GO:0006888,GO:0006886,AT2G27460.1,sec23/sec24,transport,family,protein,LOC_Os04g33690.1,sec23/Sec24,trunk,domain,containing,protein,,expressed
6-43359512	6	43359512	1	Sobic.006G071628	43367068	43375291	Sobic.006G071628.2.p,PF04810,PF08033,PF04815,PF04811,PTHR13803,PTHR13803:SF10,KOG1985,GO:0030127,GO:0008270,GO:0006888,GO:0006886,AT2G27460.1,sec23/sec24,transport,family,protein,LOC_Os04g33690.1,sec23/Sec24,trunk,domain,containing,protein,,expressed
6-43359512	6	43359512	1	Sobic.006G071628	43367068	43375291	Sobic.006G071628.3.p,PF08033,PF04815,PF04811,PTHR13803,PTHR13803:SF10,GO:0030127,GO:0006888,GO:0006886,AT2G27460.1,sec23/sec24,transport,family,protein,LOC_Os04g33690.1,sec23/Sec24,trunk,domain,containing,protein,,expressed
6-43359732	6	43359732	1	Sobic.006G071096	43353433	43354267	Sobic.006G071096.1.p,PF11250,PTHR33155,PTHR33155:SF5,LOC_Os04g33710.1,expressed,protein
6-43359732	6	43359732	1	Sobic.006G071362	43359681	43366424	Sobic.006G071362.1.p,PF00664,PF00005,PTHR24221,PTHR24221:SF112,KOG0057,3.6.3.43,K02021,GO:0055085,GO:0042626,GO:0016021,GO:0006810,GO:0005524,GO:0016887,AT5G03910.1,ATATH12,ATH12,ABC2,homolog,12,LOC_Os04g33700.1,ABC,transmembrane,transporter,domain,containing,protein,,expressed
6-43359732	6	43359732	1	Sobic.006G071628	43367068	43375291	Sobic.006G071628.1.p,PF04810,PF08033,PF04815,PF04811,PTHR13803,PTHR13803:SF10,KOG1985,GO:0030127,GO:0008270,GO:0006888,GO:0006886,AT2G27460.1,sec23/sec24,transport,family,protein,LOC_Os04g33690.1,sec23/Sec24,trunk,domain,containing,protein,,expressed
6-43359732	6	43359732	1	Sobic.006G071628	43367068	43375291	Sobic.006G071628.2.p,PF04810,PF08033,PF04815,PF04811,PTHR13803,PTHR13803:SF10,KOG1985,GO:0030127,GO:0008270,GO:0006888,GO:0006886,AT2G27460.1,sec23/sec24,transport,family,protein,LOC_Os04g33690.1,sec23/Sec24,trunk,domain,containing,protein,,expressed
6-43359732	6	43359732	1	Sobic.006G071628	43367068	43375291	Sobic.006G071628.3.p,PF08033,PF04815,PF04811,PTHR13803,PTHR13803:SF10,GO:0030127,GO:0006888,GO:0006886,AT2G27460.1,sec23/sec24,transport,family,protein,LOC_Os04g33690.1,sec23/Sec24,trunk,domain,containing,protein,,expressed
6-43360545	6	43360545	1	Sobic.006G071096	43353433	43354267	Sobic.006G071096.1.p,PF11250,PTHR33155,PTHR33155:SF5,LOC_Os04g33710.1,expressed,protein
6-43360545	6	43360545	1	Sobic.006G071362	43359681	43366424	Sobic.006G071362.1.p,PF00664,PF00005,PTHR24221,PTHR24221:SF112,KOG0057,3.6.3.43,K02021,GO:0055085,GO:0042626,GO:0016021,GO:0006810,GO:0005524,GO:0016887,AT5G03910.1,ATATH12,ATH12,ABC2,homolog,12,LOC_Os04g33700.1,ABC,transmembrane,transporter,domain,containing,protein,,expressed
6-43360545	6	43360545	1	Sobic.006G071628	43367068	43375291	Sobic.006G071628.1.p,PF04810,PF08033,PF04815,PF04811,PTHR13803,PTHR13803:SF10,KOG1985,GO:0030127,GO:0008270,GO:0006888,GO:0006886,AT2G27460.1,sec23/sec24,transport,family,protein,LOC_Os04g33690.1,sec23/Sec24,trunk,domain,containing,protein,,expressed
6-43360545	6	43360545	1	Sobic.006G071628	43367068	43375291	Sobic.006G071628.2.p,PF04810,PF08033,PF04815,PF04811,PTHR13803,PTHR13803:SF10,KOG1985,GO:0030127,GO:0008270,GO:0006888,GO:0006886,AT2G27460.1,sec23/sec24,transport,family,protein,LOC_Os04g33690.1,sec23/Sec24,trunk,domain,containing,protein,,expressed
6-43360545	6	43360545	1	Sobic.006G071628	43367068	43375291	Sobic.006G071628.3.p,PF08033,PF04815,PF04811,PTHR13803,PTHR13803:SF10,GO:0030127,GO:0006888,GO:0006886,AT2G27460.1,sec23/sec24,transport,family,protein,LOC_Os04g33690.1,sec23/Sec24,trunk,domain,containing,protein,,expressed
6-43360690	6	43360690	1	Sobic.006G071096	43353433	43354267	Sobic.006G071096.1.p,PF11250,PTHR33155,PTHR33155:SF5,LOC_Os04g33710.1,expressed,protein
6-43360690	6	43360690	1	Sobic.006G071362	43359681	43366424	Sobic.006G071362.1.p,PF00664,PF00005,PTHR24221,PTHR24221:SF112,KOG0057,3.6.3.43,K02021,GO:0055085,GO:0042626,GO:0016021,GO:0006810,GO:0005524,GO:0016887,AT5G03910.1,ATATH12,ATH12,ABC2,homolog,12,LOC_Os04g33700.1,ABC,transmembrane,transporter,domain,containing,protein,,expressed
6-43360690	6	43360690	1	Sobic.006G071628	43367068	43375291	Sobic.006G071628.1.p,PF04810,PF08033,PF04815,PF04811,PTHR13803,PTHR13803:SF10,KOG1985,GO:0030127,GO:0008270,GO:0006888,GO:0006886,AT2G27460.1,sec23/sec24,transport,family,protein,LOC_Os04g33690.1,sec23/Sec24,trunk,domain,containing,protein,,expressed
6-43360690	6	43360690	1	Sobic.006G071628	43367068	43375291	Sobic.006G071628.2.p,PF04810,PF08033,PF04815,PF04811,PTHR13803,PTHR13803:SF10,KOG1985,GO:0030127,GO:0008270,GO:0006888,GO:0006886,AT2G27460.1,sec23/sec24,transport,family,protein,LOC_Os04g33690.1,sec23/Sec24,trunk,domain,containing,protein,,expressed
6-43360690	6	43360690	1	Sobic.006G071628	43367068	43375291	Sobic.006G071628.3.p,PF08033,PF04815,PF04811,PTHR13803,PTHR13803:SF10,GO:0030127,GO:0006888,GO:0006886,AT2G27460.1,sec23/sec24,transport,family,protein,LOC_Os04g33690.1,sec23/Sec24,trunk,domain,containing,protein,,expressed
6-43361528	6	43361528	1	Sobic.006G071096	43353433	43354267	Sobic.006G071096.1.p,PF11250,PTHR33155,PTHR33155:SF5,LOC_Os04g33710.1,expressed,protein
6-43361528	6	43361528	1	Sobic.006G071362	43359681	43366424	Sobic.006G071362.1.p,PF00664,PF00005,PTHR24221,PTHR24221:SF112,KOG0057,3.6.3.43,K02021,GO:0055085,GO:0042626,GO:0016021,GO:0006810,GO:0005524,GO:0016887,AT5G03910.1,ATATH12,ATH12,ABC2,homolog,12,LOC_Os04g33700.1,ABC,transmembrane,transporter,domain,containing,protein,,expressed
6-43361528	6	43361528	1	Sobic.006G071628	43367068	43375291	Sobic.006G071628.1.p,PF04810,PF08033,PF04815,PF04811,PTHR13803,PTHR13803:SF10,KOG1985,GO:0030127,GO:0008270,GO:0006888,GO:0006886,AT2G27460.1,sec23/sec24,transport,family,protein,LOC_Os04g33690.1,sec23/Sec24,trunk,domain,containing,protein,,expressed
6-43361528	6	43361528	1	Sobic.006G071628	43367068	43375291	Sobic.006G071628.2.p,PF04810,PF08033,PF04815,PF04811,PTHR13803,PTHR13803:SF10,KOG1985,GO:0030127,GO:0008270,GO:0006888,GO:0006886,AT2G27460.1,sec23/sec24,transport,family,protein,LOC_Os04g33690.1,sec23/Sec24,trunk,domain,containing,protein,,expressed
6-43361528	6	43361528	1	Sobic.006G071628	43367068	43375291	Sobic.006G071628.3.p,PF08033,PF04815,PF04811,PTHR13803,PTHR13803:SF10,GO:0030127,GO:0006888,GO:0006886,AT2G27460.1,sec23/sec24,transport,family,protein,LOC_Os04g33690.1,sec23/Sec24,trunk,domain,containing,protein,,expressed
8-579562	8	579562	1	Sobic.008G006800	570019	573574	Sobic.008G006800.1.p,PF08263,PF00560,PF13855,PF07714,PTHR27008,PTHR27008:SF27,KOG1187,2.7.11.1,GO:0005515,GO:0006468,GO:0004672,AT3G51740.1,IMK2,inflorescence,meristem,receptor-like,kinase,2,LOC_Os11g01620.1,inactive,receptor,kinase,At2g26730,precursor,,putative,,expressed
8-579562	8	579562	1	Sobic.008G006900	575743	577182	Sobic.008G006900.1.p,PF07731,PTHR11709,PTHR11709:SF85,1.10.3.2,K05909,GO:0055114,GO:0016491,GO:0005507,AT5G05390.1,LAC12,laccase,12,LOC_Os12g01730.1,laccase-23,precursor,,putative,,expressed
8-579562	8	579562	1	Sobic.008G007000	577938	580944	Sobic.008G007000.1.p,PF04438,PTHR13093,KOG3362,K11663,AT5G37055.1,ATSWC6,SEF,HIT-type,Zinc,finger,family,protein,LOC_Os03g25260.1,HIT,zinc,finger,domain,containing,protein,,expressed
8-579562	8	579562	1	Sobic.008G007100	583577	584152	Sobic.008G007100.1.p,PF00139,PTHR27007,PTHR27007:SF58,2.7.11.1,GO:0030246,AT4G29050.1,Concanavalin,A-like,lectin,protein,kinase,family,protein,LOC_Os02g42780.1,lectin,receptor-type,protein,kinase,,putative,,expressed
8-579562	8	579562	1	Sobic.008G007200	584569	586479	Sobic.008G007200.1.p,PF00069,PF00139,PTHR27007,PTHR27007:SF58,KOG1187,2.7.11.1,GO:0006468,GO:0005524,GO:0004672,GO:0030246,AT4G02420.1,Concanavalin,A-like,lectin,protein,kinase,family,protein,LOC_Os04g44900.1,lectin-like,receptor,kinase,,putative,,expressed
8-579562	8	579562	1	Sobic.008G007300	587710	589652	Sobic.008G007300.1.p,PF04438,PTHR13093,KOG3362,K11663,AT5G37055.1,ATSWC6,SEF,HIT-type,Zinc,finger,family,protein,LOC_Os03g25260.1,HIT,zinc,finger,domain,containing,protein,,expressed
8-619887	8	619887	1	Sobic.008G008100	620605	626551	Sobic.008G008100.6.p,PF01344,PF10539,PTHR24412,PTHR24412:SF228,GO:0005515,AT5G01660.1,LOC_Os07g35610.1,kelch,repeat-containing,protein,,putative,,expressed
8-629417	8	629417	1	Sobic.008G008200	630179	632455	Sobic.008G008200.2.p,PTHR10383,PTHR10383:SF23,GO:0016020,AT3G24460.1,Serinc-domain,containing,serine,and,sphingolipid,biosynthesis,protein,LOC_Os01g08460.1,TMS,membrane,protein/tumour,differentially,expressed,protein,,putative,,expressed
8-630891	8	630891	1	Sobic.008G008300	636520	638667	Sobic.008G008300.1.p,PTHR31728,AT3G08780.1,LOC_Os07g35600.2,expressed,protein
8-1825549	8	1825549	1	Sobic.008G020900	1817313	1819121	Sobic.008G020900.1.p,PF13191,PTHR23155,PTHR23155:SF540,K13457,AT3G07040.1,RPM1,RPS3,NB-ARC,domain-containing,disease,resistance,protein,LOC_Os09g09490.1,disease,resistance,protein,RPM1,,putative,,expressed
8-1825549	8	1825549	1	Sobic.008G021000	1824200	1827724	Sobic.008G021000.1.p,PF03016,PTHR11062,PTHR11062:SF51,KOG1021,2.4.2.41,AT3G45400.1,exostosin,family,protein,LOC_Os12g03100.1,exostosin,family,domain,containing,protein,,expressed
8-1825549	8	1825549	1	Sobic.008G021000	1824200	1827724	Sobic.008G021000.2.p,PF03016,PTHR11062,PTHR11062:SF51,KOG1021,2.4.2.41,AT3G45400.1,exostosin,family,protein,LOC_Os12g03100.1,exostosin,family,domain,containing,protein,,expressed
8-1825549	8	1825549	1	Sobic.008G021100	1830838	1831639	Sobic.008G021100.1.p,PF00380,PTHR21569,PTHR21569:SF6,KOG1753,K02960,GO:0006412,GO:0005840,GO:0003735,AT2G09990.1,Ribosomal,protein,S5,domain,2-like,superfamily,protein,LOC_Os12g03090.1,ribosomal,protein,,putative,,expressed
8-1825549	8	1825549	1	Sobic.008G021200	1834003	1837994	Sobic.008G021200.1.p,PF03223,PTHR10137,KOG2909,K02148,GO:0033180,GO:0015991,GO:0015078,AT1G12840.1,ATVHA-C,DET3,vacuolar,ATP,synthase,subunit,C,(VATC),/,V-ATPase,C,subunit,/,vacuolar,proton,pump,C,subunit,(DET3),LOC_Os05g51530.2,vacuolar,ATP,synthase,subunit,C,,putative,,expressed
8-1825552	8	1825552	1	Sobic.008G020800	1815273	1820116	Sobic.008G020800.1.p,PF02704,PTHR23201,PTHR23201:SF17,AT1G74670.1,Gibberellin-regulated,family,protein,LOC_Os09g24840.1,GASR10,-,Gibberellin-regulated,GASA/GAST/Snakin,family,protein,precursor,,expressed
8-1825552	8	1825552	1	Sobic.008G021100	1830838	1831639	Sobic.008G021100.1.p,PF00380,PTHR21569,PTHR21569:SF6,KOG1753,K02960,GO:0006412,GO:0005840,GO:0003735,AT2G09990.1,Ribosomal,protein,S5,domain,2-like,superfamily,protein,LOC_Os12g03090.1,ribosomal,protein,,putative,,expressed
8-1825552	8	1825552	1	Sobic.008G021200	1834003	1837994	Sobic.008G021200.1.p,PF03223,PTHR10137,KOG2909,K02148,GO:0033180,GO:0015991,GO:0015078,AT1G12840.1,ATVHA-C,DET3,vacuolar,ATP,synthase,subunit,C,(VATC),/,V-ATPase,C,subunit,/,vacuolar,proton,pump,C,subunit,(DET3),LOC_Os05g51530.2,vacuolar,ATP,synthase,subunit,C,,putative,,expressed
